# Supplementary material for: Transcriptomic sequencing reveals the response of Dunaliella salina to copper stress via the increased photosynthesis and carbon mechanism
Source: Royal Society of Chemistry journal article supplement (doi:10.1039/d1mo00125f), 2021-06-24
Supplement: d1mo00125f1.pdf [file d1mo00125f1.pdf]

Table S1. The inhibitory rates of copper on *Dunaliella salina*

| Time (h) | Cu ( $\mu\text{mol/L}$ ) |                  |                  |                  |
|----------|--------------------------|------------------|------------------|------------------|
|          | 15                       | 30               | 60               | 120              |
| 24       | $-10.8 \pm 1.71$         | $-5.73 \pm 0.99$ | $21.48 \pm 2.63$ | $31.30 \pm 2.63$ |
| 48       | $9.65 \pm 0.63$          | $28.34 \pm 2.35$ | $36.73 \pm 3.68$ | $47.40 \pm 2.12$ |
| 72       | $20.5 \pm 1.92$          | $44.53 \pm 2.24$ | $54.79 \pm 2.37$ | $62.64 \pm 3.48$ |
| 96       | $28.9 \pm 3.40$          | $50.39 \pm 1.73$ | $63.77 \pm 4.19$ | $78.05 \pm 2.02$ |

Table S5. KEGG pathway enrichment analysis of DEGs

| Level 1    | Level 2                 | Pathway                                             | Pathway ID | No. of DEGs |
|------------|-------------------------|-----------------------------------------------------|------------|-------------|
| Metabolism | Amino acid metabolism   | Valine, leucine and isoleucine degradation          | ko00280    | 11          |
| Metabolism | Amino acid metabolism   | Cysteine and methionine metabolism                  | ko00270    | 11          |
| Metabolism | Amino acid metabolism   | Lysine degradation                                  | ko00310    | 6           |
| Metabolism | Amino acid metabolism   | Tryptophan metabolism                               | ko00380    | 4           |
| Metabolism | Amino acid metabolism   | Glycine, serine and threonine metabolism            | ko00260    | 6           |
| Metabolism | Amino acid metabolism   | Arginine and proline metabolism                     | ko00330    | 5           |
| Metabolism | Amino acid metabolism   | Histidine metabolism                                | ko00340    | 2           |
| Metabolism | Amino acid metabolism   | Tyrosine metabolism                                 | ko00350    | 2           |
| Metabolism | Amino acid metabolism   | Phenylalanine, tyrosine and tryptophan biosynthesis | ko00400    | 2           |
| Metabolism | Amino acid metabolism   | Lysine biosynthesis                                 | ko00300    | 1           |
| Metabolism | Amino acid metabolism   | Alanine, aspartate and glutamate metabolism         | ko00250    | 3           |
| Metabolism | Amino acid metabolism   | Arginine biosynthesis                               | ko00220    | 2           |
| Metabolism | Carbohydrate metabolism | Pentose and glucuronate interconversions            | ko00040    | 10          |
| Metabolism | Carbohydrate metabolism | Ascorbate and aldarate metabolism                   | ko00053    | 8           |
| Metabolism | Carbohydrate metabolism | Propanoate metabolism                               | ko00640    | 7           |
| Metabolism | Carbohydrate metabolism | Galactose metabolism                                | ko00052    | 7           |
| Metabolism | Carbohydrate metabolism | Glycolysis / gluconeogenesis                        | ko00010    | 14          |
| Metabolism | Carbohydrate metabolism | Amino sugar and nucleotide sugar metabolism         | ko00520    | 10          |
| Metabolism | Carbohydrate metabolism | Starch and sucrose metabolism                       | ko00500    | 10          |
| Metabolism | Carbohydrate metabolism | Pyruvate metabolism                                 | ko00620    | 10          |
| Metabolism | Carbohydrate metabolism | Glyoxylate and dicarboxylate metabolism             | ko00630    | 8           |
| Metabolism | Carbohydrate metabolism | Fructose and mannose metabolism                     | ko00051    | 5           |
| Metabolism | Carbohydrate metabolism | Inositol phosphate metabolism                       | ko00562    | 3           |
| Metabolism | Carbohydrate metabolism | Butanoate metabolism                                | ko00650    | 1           |
| Metabolism | Carbohydrate metabolism | Citrate cycle (TCA cycle)                           | ko00020    | 3           |
| Metabolism | Carbohydrate metabolism | Pentose phosphate pathway                           | ko00030    | 2           |
| Metabolism | Energy metabolism       | Photosynthesis                                      | ko00195    | 19          |
| Metabolism | Energy metabolism       | Carbon fixation in photosynthetic organisms         | ko00710    | 8           |
| Metabolism | Energy metabolism       | Photosynthesis - antenna proteins                   | ko00196    | 3           |
| Metabolism | Energy metabolism       | Oxidative phosphorylation                           | ko00190    | 10          |
| Metabolism | Energy metabolism       | Nitrogen metabolism                                 | ko00910    | 2           |
| Metabolism | Lipid metabolism        | Fatty acid degradation                              | ko00071    | 8           |
| Metabolism | Lipid metabolism        | Alpha-linolenic acid metabolism                     | ko00592    | 6           |
| Metabolism | Lipid metabolism        | Biosynthesis of unsaturated fatty acids             | ko01040    | 5           |
| Metabolism | Lipid metabolism        | Glycerolipid metabolism                             | ko00561    | 5           |
| Metabolism | Lipid metabolism        | Synthesis and degradation of ketone bodies          | ko00072    | 1           |
| Metabolism | Lipid metabolism        | Sphingolipid metabolism                             | ko00600    | 3           |
| Metabolism | lipid metabolism        | Glycerophospholipid metabolism                      | ko00564    | 4           |
| Metabolism | lipid metabolism        | Fatty acid elongation                               | ko00062    | 1           |
| Metabolism | Lipid metabolism        | Steroid biosynthesis                                | ko00100    | 1           |
| Metabolism | Lipid metabolism        | Fatty acid biosynthesis                             | ko00061    | 2           |
| Metabolism | Nucleotide metabolism   | Pyrimidine metabolism                               | ko00240    | 18          |

|                                       |                                             |                                                     |                                       |         |    |
|---------------------------------------|---------------------------------------------|-----------------------------------------------------|---------------------------------------|---------|----|
| <b>Metabolism</b>                     | Nucleotide metabolism                       | Purine metabolism                                   | ko00230                               | 17      |    |
| <b>Metabolism</b>                     | Metabolism of other amino acids             | Selenocompound metabolism                           | ko00450                               | 7       |    |
| <b>Metabolism</b>                     | Metabolism of other amino acids             | Cyanoamino acid metabolism                          | ko00460                               | 2       |    |
| <b>Metabolism</b>                     | Metabolism of other amino acids             | Beta-alanine metabolism                             | ko00410                               | 3       |    |
| <b>Metabolism</b>                     | Metabolism of other amino acids             | Taurine and hypotaurine metabolism                  | ko00430                               | 1       |    |
| <b>Metabolism</b>                     | Metabolism of other amino acids             | Glutathione metabolism                              | ko00480                               | 5       |    |
| <b>Metabolism</b>                     | Metabolism of cofactors and vitamins        | Nicotinate and nicotinamide metabolism              | ko00760                               | 4       |    |
| <b>Metabolism</b>                     | Metabolism of cofactors and vitamins        | Porphyrin and chlorophyll metabolism                | ko00860                               | 7       |    |
| <b>Metabolism</b>                     | Metabolism of cofactors and vitamins        | Riboflavin metabolism                               | ko00740                               | 2       |    |
| <b>Metabolism</b>                     | Metabolism of cofactors and vitamins        | Thiamine metabolism                                 | ko00730                               | 1       |    |
| <b>Metabolism</b>                     | Metabolism of cofactors and vitamins        | Folate biosynthesis                                 | ko00790                               | 1       |    |
| <b>Metabolism</b>                     | Metabolism of cofactors and vitamins        | Biotin metabolism                                   | ko00780                               | 1       |    |
| <b>Metabolism</b>                     | Metabolism of cofactors and vitamins        | One carbon pool by folate                           | ko00670                               | 1       |    |
| <b>Metabolism</b>                     | Metabolism of cofactors and vitamins        | Pantothenate and coa biosynthesis                   | ko00770                               | 1       |    |
| <b>Metabolism</b>                     | Metabolism of cofactors and vitamins        | Ubiquinone and other terpenoid-quinone biosynthesis | ko00130                               | 1       |    |
| <b>Metabolism</b>                     | Metabolism of terpenoids and polyketides    | Limonene and pinene degradation                     | ko00903                               | 2       |    |
| <b>Metabolism</b>                     | Metabolism of terpenoids and polyketides    | Terpenoid backbone biosynthesis                     | ko00900                               | 3       |    |
| <b>Metabolism</b>                     | Metabolism of terpenoids and polyketides    | Carotenoid biosynthesis                             | ko00906                               | 2       |    |
| <b>Metabolism</b>                     | Glycan biosynthesis and metabolism          | Other glycan degradation                            | ko00511                               | 9       |    |
| <b>Metabolism</b>                     | Gycan biosynthesis and metabolism           | n-glycan biosynthesis                               | ko00510                               | 1       |    |
| <b>Metabolism</b>                     | Biosynthesis of other secondary metabolites | Carbapenem biosynthesis                             | ko00332                               | 1       |    |
| <b>Metabolism</b>                     | Biosynthesis of other secondary metabolites | Monobactam biosynthesis                             | ko00261                               | 1       |    |
| <b>Metabolism</b>                     | Global and overview maps                    | Metabolic pathways                                  | ko01100                               | 141     |    |
| <b>Metabolism</b>                     | Global and overview maps                    | Degradation of aromatic compounds                   | ko01220                               | 4       |    |
| <b>Metabolism</b>                     | Global and overview maps                    | Biosynthesis of secondary metabolites               | ko01110                               | 63      |    |
| <b>Metabolism</b>                     | Global and overview maps                    | Carbon metabolism                                   | ko01200                               | 20      |    |
| <b>Metabolism</b>                     | Gobal and overview maps                     | Biosynthesis of amino acids                         | ko01230                               | 18      |    |
| <b>Metabolism</b>                     | Global and overview maps                    | Fatty acid metabolism                               | ko01212                               | 7       |    |
| <b>Metabolism</b>                     | Global and overview maps                    | 2-oxocarboxylic acid metabolism                     | ko01210                               | 3       |    |
| <b>Cellular processes</b>             | Transport and catabolism                    | Endocytosis                                         | ko04144                               | 10      |    |
| <b>Cellular processes</b>             | Transport and catabolism                    | Peroxisome                                          | ko04146                               | 7       |    |
| <b>Cellular processes</b>             | Transport and catabolism                    | Regulation of autophagy                             | ko04140                               | 2       |    |
| <b>Cellular processes</b>             | Transport and catabolism                    | Phagosome                                           | ko04145                               | 3       |    |
| <b>Environmental processing</b>       | <b>information</b>                          | Signal transduction                                 | Phosphatidylinositol signaling system | ko04070 | 6  |
| <b>Environmental processing</b>       | <b>information</b>                          | Signal transduction                                 | Plant hormone signal transduction     | ko04075 | 7  |
| <b>Environmental processing</b>       | <b>information</b>                          | Membrane transport                                  | ABC transporters                      | ko02010 | 17 |
| <b>Genetic information processing</b> | Folding, sorting and degradation            | Protein processing in endoplasmic reticulum         | ko04141                               | 20      |    |
| <b>Genetic information processing</b> | Folding, sorting and degradation            | Ubiquitin mediated proteolysis                      | ko04120                               | 8       |    |
| <b>Genetic information processing</b> | Folding, sorting and degradation            | Proteasome                                          | ko03050                               | 1       |    |
| <b>Genetic information processing</b> | Folding, sorting and degradation            | RNA degradation                                     | ko03018                               | 4       |    |
| <b>Genetic information processing</b> | Replication and repair                      | DNA replication                                     | ko03030                               | 7       |    |
| <b>Genetic information processing</b> | Replication and repair                      | Base excision repair                                | ko03410                               | 2       |    |

---

|                                       |                          |                                   |         |    |
|---------------------------------------|--------------------------|-----------------------------------|---------|----|
| <b>Genetic information processing</b> | Replication and repair   | Mismatch repair                   | ko03430 | 2  |
| <b>Genetic information processing</b> | Replication and repair   | Homologous recombination          | ko03440 | 1  |
| <b>Genetic information processing</b> | Replication and repair   | Nucleotide excision repair        | ko03420 | 1  |
| <b>Genetic information processing</b> | Transcription            | RNA polymerase                    | ko03020 | 9  |
| <b>Genetic information processing</b> | Transcription            | Spliceosome                       | ko03040 | 13 |
| <b>Genetic information processing</b> | Translation              | Ribosome                          | ko03010 | 43 |
| <b>Genetic information processing</b> | Translation              | Aminoacyl-trna biosynthesis       | ko00970 | 7  |
| <b>Genetic information processing</b> | Translation              | mRNA surveillance pathway         | ko03015 | 3  |
| <b>Genetic information processing</b> | Translation              | Ribosome biogenesis in eukaryotes | ko03008 | 4  |
| <b>Genetic information processing</b> | Translation              | RNA transport                     | ko03013 | 3  |
| <b>Organismal systems</b>             | Environmental adaptation | Plant-pathogen interaction        | ko04626 | 17 |

---

Table S6. DEGs related to photosynthesis, carbohydrate metabolism, copper transport and HSPs

| Pathway               | Gene name                      | Gene description                                      | Number of DEGs                                                     | Up/Down | Log2(FC) |       |
|-----------------------|--------------------------------|-------------------------------------------------------|--------------------------------------------------------------------|---------|----------|-------|
| <b>Photosynthesis</b> | PsbA                           | Photosystem II P680 protein D1                        | 1                                                                  | up      | 2.52     |       |
|                       | PsbB                           | Photosystem II cp47 chlorophyll apoprotein            | 1                                                                  | up      | 3.37     |       |
|                       | PsbC                           | Photosystem II cp43 chlorophyll apoprotein            | 1                                                                  | up      | 3.84     |       |
|                       | PsbD                           | Photosystem II P680 protein D2                        | 1                                                                  | up      | 1.09     |       |
|                       | PsbE                           | Photosystem II cytochrome b559 subunit alpha          | 1                                                                  | up      | 2.93     |       |
|                       | PsbM                           | Photosystem II PsbM protein                           | 1                                                                  | up      | 4.44     |       |
|                       | PsbH                           | Photosystem II protein H                              | 1                                                                  | up      | 3.65     |       |
|                       | PsbO                           | PSII oxygen-evolving enhancer protein 1               | 1                                                                  | up      | 2.38     |       |
|                       | PsbP                           | PSII oxygen-evolving enhancer protein 2               | 2                                                                  | up      | 1.81     |       |
|                       | PsbQ                           | PSII oxygen-evolving enhancer protein 3               | 1                                                                  | up      | 1.37     |       |
|                       | PsbZ                           | Photosystem II PsbZ protein                           | 2                                                                  | up      | 5.47     |       |
|                       | PsaA                           | Photosystem I P700 chlorophyll a apoprotein a1        | 1                                                                  | up      | 1.14     |       |
|                       | PsaC                           | Photosystem I subunit vii                             | 1                                                                  | up      | 3.04     |       |
|                       | PsaE                           | Photosystem I subunit iv                              | 1                                                                  | up      | 1.14     |       |
|                       | lhca1                          | Light-harvesting complex I chlorophyll a/b protein 1  | 1                                                                  | down    | -1.37    |       |
|                       | lhca3                          | Light-harvesting complex I chlorophyll a/b protein 3  | 1                                                                  | up      | 1.05     |       |
|                       | lhcb2                          | Light-harvesting complex II chlorophyll a/b protein 2 | 1                                                                  | down    | -1.05    |       |
|                       | lhcb4                          | Light-harvesting complex II chlorophyll a/b protein 4 | 1                                                                  | up      | 1.08     |       |
|                       | PetA                           | Apocytochrome f                                       | 1                                                                  | up      | 1.43     |       |
|                       | PetB                           | Pytochrome b6                                         | 1                                                                  | up      | 2.05     |       |
|                       | PetC                           | Pytochrome b6-f complex iron-sulfur subunit           | 2                                                                  | up      | 2.03     |       |
|                       | PetH                           | Ferredoxin-NADP+ reductase                            | 1                                                                  | down    | -5.53    |       |
|                       | ATPF1A                         | F-type H+-transporting ATPase alpha subunit           | 1                                                                  | up      | 4.55     |       |
|                       | ATPF1B                         | F-type H+-transporting ATPase beta subunit            | 1                                                                  | up      | 3.00     |       |
|                       | ATPF0C                         | F-type H+-transporting ATPase c subunit               | 1                                                                  | up      | 3.25     |       |
|                       | <b>Carbohydrate metabolism</b> | RbcL                                                  | Ribulose biphosphate carboxylase large chain                       | 1       | up       | 2.71  |
|                       |                                | Tkta                                                  | Transketolase                                                      | 1       | up       | 5.10  |
|                       |                                | Pgm                                                   | Phosphoglucomutase                                                 | 1       | up       | 2.49  |
|                       |                                | Mdh1                                                  | Malate dehydrogenase                                               | 3       | up       | 2.56  |
|                       |                                | Idh                                                   | Isocitrate dehydrogenase                                           | 1       | up       | 2.12  |
|                       |                                | Cs                                                    | Citrate synthase                                                   | 1       | down     | -4.47 |
|                       |                                | Sdhc/Frdc                                             | Succinate dehydrogenase / Fumarate reductase, Cytochrome b subunit | 1       | down     | -4.29 |
| <b>Glycolysis</b>     | Aldo                           | Fructose-bisphosphate aldolase                        | 2                                                                  | up      | 5.17     |       |
|                       | Gapdh                          | Glyceraldehyde-3-phosphate dehydrogenase              | 1                                                                  | up      | 2.93     |       |
|                       | Adh                            | Alcohol dehydrogenase (NADP+)                         | 2                                                                  | up      | 1.88     |       |
|                       | Pgk                            | Phosphoglycerate kinase                               | 1                                                                  | up      | 1.70     |       |
|                       | Tpi                            | Triose phosphate isomerase                            | 1                                                                  | up      | 5.11     |       |
|                       | Pdc                            | Pyruvate decarboxylase                                | 1                                                                  | up      | 1.77     |       |

|                           |         |                                                        |   |      |       |
|---------------------------|---------|--------------------------------------------------------|---|------|-------|
|                           | Pyk     | Pyruvate kinase                                        | 1 | down | -5.57 |
|                           | Gpi     | Glucose-6-phosphate isomerase                          | 1 | down | -1.35 |
| <b>Ion transport</b>      | CopA    | Heavy metal transporting ATPase                        | 3 | up   | 4.78  |
|                           | CopB    | heavy metal transporting ATPase                        | 3 | up   | 1.78  |
|                           | CutC    | Copper homeostasis protein                             | 1 | down | -1.29 |
|                           | Vps4    | Vacuolar protein-sorting-associated protein 4          | 1 | up   | 1.17  |
|                           | Vps36   | Vacuolar protein-sorting-associated protein 36         | 1 | up   | 1.26  |
|                           | Mrs2    | Magnesium transporter                                  | 1 | down | -1.80 |
|                           | Zip     | Zinc transporter                                       | 3 | up   | 6.03  |
|                           | ABCB1   | ATP-binding cassette, subfamily b, member 1            | 1 | up   | 1.69  |
|                           | ABCC1   | ATP-binding cassette, subfamily c, member 1            | 1 | up   | 1.34  |
|                           | ABCC10  | ATP-binding cassette, subfamily c, member 2            | 1 | up   | 1.22  |
|                           | ABCA1   | ATP-binding cassette, subfamily a, member 1            | 1 | down | -1.25 |
|                           | ABCB8   | ATP-binding cassette, subfamily b, member 8            | 1 | down | -1.19 |
| <b>Response to stress</b> | Hsp20   | Heat shock protein HSP20                               | 3 | up   | 3.00  |
|                           | DnaK    | Molecular chaperone DnaK                               | 3 | up   | 2.85  |
|                           | DnaJC13 | Molecular chaperone DnaJ homolog subfamily c member 13 | 1 | up   | 2.75  |
|                           | Hsp33   | Heat shock protein 33                                  | 1 | up   | 1.34  |
|                           | GroEL   | Heat shock protein 60 kDa                              | 4 | down | -6.25 |
|                           | Hsp70   | Heat shock protein 70                                  | 1 | down | -1.04 |
|                           | DnaJC11 | DnaJ heat shock protein family (hsp40) member c11      | 1 | down | -4.38 |
|                           | DnaJC7  | DnaJ homolog subfamily C member 7                      | 1 | down | -2.08 |
|                           | Sod1    | Cu/Zn superoxide dismutase                             | 3 | up   | 1.33  |
|                           | Cat     | Catalase                                               | 2 | up   | 1.75  |
