# Supplementary material for: Transcriptomic sequencing reveals the response of Dunaliella salina to copper stress via the increased photosynthesis and carbon mechanism
Source: Royal Society of Chemistry journal article supplement (doi:10.1039/d1mo00125f), 2021-06-24
Supplement: d1mo00125f2.xlsx [file d1mo00125f2.xlsx]

## Sheet: DEGs informaiton
The DEGs information between the control and the copper-treated group
Gene_id	NR description	FC(Cu/Control)	Log2FC(Cu/Control)	Pvalue	Padjust	Significant	Regulate
TRINITY_DN8999_c0_g2	hypothetical protein CEUSTIGMA_g12375.t1 [Chlamydomonas eustigma]	2.24254	1.16513	0.014193	0.0513237	yes	up
TRINITY_DN11755_c0_g1	UBP1-associated s 1C [Chlorella sorokiniana]	8.03418	3.00615	8.18703e-05	0.00070407	yes	up
TRINITY_DN24311_c0_g1	hypothetical protein CHLNCDRAFT_136065 [Chlorella variabilis]	2.57438	1.36423	5.65634e-06	6.94256e-05	yes	up
TRINITY_DN969_c0_g2	hypothetical protein GPECTOR_33g557 [Gonium pectorale]	2.05803	1.04126	0.00809919	0.0328065	yes	up
TRINITY_DN1924_c2_g1	predicted protein [Ostreococcus lucimarinus CCE9901]	2.24811	1.16871	0.000179063	0.0013723	yes	up
TRINITY_DN969_c1_g2	hypothetical protein CEUSTIGMA_g360.t1 [Chlamydomonas eustigma]	2.53738	1.34334	4.01604e-07	6.74748e-06	yes	up
TRINITY_DN19949_c0_g1	thioesterase [Chlorella sorokiniana]	9.52666	3.25197	0.000931787	0.00554213	yes	up
TRINITY_DN16667_c0_g3	Malonyl- -acyl carrier mitochondrial [Chlorella sorokiniana]	2.41982	1.2749	4.49665e-07	7.45512e-06	yes	up
TRINITY_DN8359_c0_g3	golgin subfamily B member, partial [Micractinium conductrix]	4.60621	2.20358	0.00163368	0.00887531	yes	up
TRINITY_DN1087_c0_g1	hypothetical protein COCSUDRAFT_56469 [Coccomyxa subellipsoidea C-169]	3.41382	1.77139	2.47482e-13	1.30038e-11	yes	up
TRINITY_DN8324_c0_g1	hypothetical protein CHLNCDRAFT_144235 [Chlorella variabilis]	2.4001	1.2631	7.06566e-05	0.000620755	yes	up
TRINITY_DN7453_c0_g1	reverse transcriptase [Chlorella vulgaris]	5.49105	2.45708	0.00143955	0.00797332	yes	up
TRINITY_DN7401_c0_g1	reverse transcriptase [Chlorella vulgaris]	2.56557	1.35928	1.38429e-05	0.000152556	yes	up
TRINITY_DN3979_c0_g1	reverse transcriptase [Chlorella vulgaris]	5.00751	2.32409	8.57362e-05	0.000733337	yes	up
TRINITY_DN6773_c1_g1	reverse transcriptase [Chlorella vulgaris]	4.66962	2.22331	0.000314078	0.00221978	yes	up
TRINITY_DN8934_c0_g1	reverse transcriptase [Chlorella vulgaris]	3.16292	1.66126	0.000422937	0.00285902	yes	up
TRINITY_DN12449_c0_g3	reverse transcriptase [Chlorella vulgaris]	4.77808	2.25643	0.00470371	0.0210242	yes	up
TRINITY_DN3420_c1_g1	hypothetical protein COCSUDRAFT_83557 [Coccomyxa subellipsoidea C-169]	3.56279	1.83301	0.0269477	0.0845218	yes	up
TRINITY_DN10350_c0_g1	hypothetical protein GPECTOR_14g268 [Gonium pectorale]	3.30581	1.72501	1.29001e-12	6.12611e-11	yes	up
TRINITY_DN10975_c0_g1	oligouridylate-binding 1-like [Chlorella sorokiniana]	2.06581	1.04671	5.1612e-08	1.06873e-06	yes	up
TRINITY_DN8513_c0_g1	Nucleolar protein 12 [Auxenochlorella protothecoides]	2.60076	1.37893	0.000397887	0.00271646	yes	up
TRINITY_DN8590_c3_g1	Alpha-protein kinase vwkA [Tetrabaena socialis]	2.96151	1.56634	0.02809	0.0872069	yes	up
TRINITY_DN10080_c0_g2	hypothetical protein CHLNCDRAFT_141214 [Chlorella variabilis]	2.29723	1.1999	5.74438e-18	5.63361e-16	yes	up
TRINITY_DN24742_c0_g1	kinase and PP2C-like domain-containing [Chlorella sorokiniana]	2.92676	1.5493	4.20432e-11	1.56663e-09	yes	up
TRINITY_DN5059_c0_g10	hypothetical protein CHLRE_04g211600v5 [Chlamydomonas reinhardtii]	2.12141	1.08502	0.013608	0.0495895	yes	up
TRINITY_DN20728_c0_g1	hypothetical protein GPECTOR_17g853 [Gonium pectorale]	4.0293	2.01053	9.65697e-21	1.34607e-18	yes	up
TRINITY_DN18805_c0_g1	hypothetical protein GPECTOR_17g853 [Gonium pectorale]	7.51464	2.9097	1.6793e-17	1.57019e-15	yes	up
TRINITY_DN13806_c0_g1	Carbohydrate/purine kinase [Monoraphidium neglectum]	3.05699	1.61211	1.53936e-08	3.5928e-07	yes	up
TRINITY_DN6758_c0_g3	hypothetical protein CHLRE_16g677250v5 [Chlamydomonas reinhardtii]	5.72223	2.51658	1.70988e-27	4.85671e-25	yes	up
TRINITY_DN13283_c0_g1	hypothetical protein CHLNCDRAFT_22513 [Chlorella variabilis]	10.0191	3.32468	0.00252874	0.0126639	yes	up
TRINITY_DN3780_c0_g1	peptidyl-prolyl cis-trans isomerase, FKBP-type [Chlamydomonas reinhardtii]	2.12868	1.08996	6.43546e-06	7.78774e-05	yes	up
TRINITY_DN9956_c0_g1	12-oxophytodienoic acid reductase [Chlorella sorokiniana]	3.53064	1.81993	8.07303e-14	4.56885e-12	yes	up
TRINITY_DN13159_c0_g1	hypothetical protein CHLRE_03g182550v5 [Chlamydomonas reinhardtii]	2.31375	1.21023	0.0089622	0.0355325	yes	up
TRINITY_DN4884_c0_g1	predicted protein [Ostreococcus lucimarinus CCE9901]	2.62516	1.39241	1.78281e-07	3.27898e-06	yes	up
TRINITY_DN13230_c0_g1	dynamin-related 3A-like [Micractinium conductrix]	4.21383	2.07513	4.8671e-08	1.01061e-06	yes	up
TRINITY_DN2782_c0_g4	hypothetical protein CHLRE_16g647550v5 [Chlamydomonas reinhardtii]	2.36077	1.23926	0.0120631	0.0451455	yes	up
TRINITY_DN4082_c0_g4	hypothetical protein GPECTOR_1g880 [Gonium pectorale]	28.7378	4.84488	0.00749203	0.0307232	yes	up
TRINITY_DN3733_c0_g1	hypothetical protein CEUSTIGMA_g8074.t1 [Chlamydomonas eustigma]	2.7626	1.46602	3.02831e-11	1.16e-09	yes	up
TRINITY_DN9354_c0_g2	Desiccation-related protein PCC13-62, partial [Tetrabaena socialis]	2.37412	1.24739	1.30829e-15	9.63083e-14	yes	up
TRINITY_DN10369_c0_g2	hypothetical protein CEUSTIGMA_g6605.t1 [Chlamydomonas eustigma]	2.90611	1.53909	0.00541906	0.0235897	yes	up
TRINITY_DN9120_c0_g1	hypothetical protein Rsub_10769 [Raphidocelis subcapitata]	2.04001	1.02857	5.18074e-10	1.59817e-08	yes	up
TRINITY_DN9749_c1_g2	hypothetical protein GPECTOR_12g554 [Gonium pectorale]	3.11935	1.64124	0.0104915	0.0403731	yes	up
TRINITY_DN8829_c0_g4	hypothetical protein CEUSTIGMA_g12369.t1 [Chlamydomonas eustigma]	2.26602	1.18016	0.00984067	0.0383339	yes	up
TRINITY_DN4708_c0_g1	SWIM zinc finger domain containing [Micractinium conductrix]	2.26524	1.17966	2.47349e-08	5.52051e-07	yes	up
TRINITY_DN466_c1_g1	hypothetical protein CEUSTIGMA_g6840.t1 [Chlamydomonas eustigma]	2.2622	1.17772	0.0143867	0.0518871	yes	up
TRINITY_DN8598_c0_g2	E3 ubiquitin-ligase SHPRH [Micractinium conductrix]	2.34773	1.23126	0.00482234	0.0214716	yes	up
TRINITY_DN2217_c0_g1	Nucleosome-remodeling factor subunit BPTF [Micractinium conductrix]	2.2575	1.17473	0.00164713	0.00893546	yes	up
TRINITY_DN4138_c0_g1	hypothetical protein CHLNCDRAFT_50346 [Chlorella variabilis]	3.19116	1.67408	1.52256e-08	3.56187e-07	yes	up
TRINITY_DN16470_c0_g4	hypothetical protein Rsub_06840 [Raphidocelis subcapitata]	7.43911	2.89513	0.0123701	0.0460255	yes	up
TRINITY_DN16872_c0_g1	serine threonine- kinase Nek1 isoform X5 [Chlorella sorokiniana]	2.13365	1.09332	0.000777009	0.00476169	yes	up
TRINITY_DN2190_c0_g1	SNF2 domain containing [Chlorella sorokiniana]	2.17602	1.12169	2.04588e-10	6.68084e-09	yes	up
TRINITY_DN3896_c0_g1	Zinc finger MYND domain-containing 10 [Chlorella sorokiniana]	3.46655	1.7935	8.31232e-13	4.05619e-11	yes	up
TRINITY_DN12791_c0_g1	TIC chloroplastic [Chlorella sorokiniana]	2.45036	1.29299	4.12484e-06	5.28471e-05	yes	up
TRINITY_DN9187_c0_g1	Swr1 complex bromodomain subunit Brf1 isoform A [Chlorella sorokiniana]	2.46121	1.29937	3.66731e-06	4.75109e-05	yes	up
TRINITY_DN16158_c0_g6	Swr1 complex bromodomain subunit Brf1 isoform A [Chlorella sorokiniana]	2.83254	1.5021	0.00425217	0.019339	yes	up
TRINITY_DN7239_c0_g1	nuclear distribution protein [Ostreococcus tauri]	2.6878	1.42642	0.034273	0.101644	yes	up
TRINITY_DN7113_c0_g1	low-CO2 inducible [Micractinium conductrix]	3.36274	1.74964	6.773e-23	1.1329e-20	yes	up
TRINITY_DN18002_c0_g1	hypothetical zinc finger protein [Chlamydomonas reinhardtii]	4.30736	2.1068	1.19082e-15	8.85263e-14	yes	up
TRINITY_DN26472_c0_g1	hypothetical protein VOLCADRAFT_82034 [Volvox carteri f. nagariensis]	2.03999	1.02856	1.01117e-06	1.53604e-05	yes	up
TRINITY_DN22488_c0_g1	hypothetical protein VOLCADRAFT_117810 [Volvox carteri f. nagariensis]	2.6102	1.38416	1.02028e-09	2.9853e-08	yes	up
TRINITY_DN3956_c1_g3	hypothetical protein VOLCADRAFT_103272 [Volvox carteri f. nagariensis]	2.38912	1.25648	0.00721342	0.0298491	yes	up
TRINITY_DN5652_c0_g1	hypothetical protein CBR_g55082 [Chara braunii]	2.57202	1.3629	0.00624131	0.0265265	yes	up
TRINITY_DN371_c0_g3	hypothetical protein VOLCADRAFT_120460 [Volvox carteri f. nagariensis]	3.48891	1.80277	1.6293e-06	2.35501e-05	yes	up
TRINITY_DN3412_c0_g1	hypothetical protein COCSUDRAFT_63603 [Coccomyxa subellipsoidea C-169]	2.34775	1.23128	9.27438e-10	2.72955e-08	yes	up
TRINITY_DN24106_c0_g1	hypothetical protein GPECTOR_563g588 [Gonium pectorale]	17.5316	4.13189	2.42049e-85	8.09734e-82	yes	up
TRINITY_DN25715_c0_g1	hypothetical protein VOLCADRAFT_82232 [Volvox carteri f. nagariensis]	32.1371	5.00617	0.00382854	0.0177776	yes	up
TRINITY_DN6404_c0_g1	hypothetical protein CEUSTIGMA_g6791.t1 [Chlamydomonas eustigma]	2.00501	1.00361	0.0257154	0.0816105	yes	up
TRINITY_DN884_c0_g1	putative phosphatase 2C 33 [Micractinium conductrix]	2.05573	1.03965	2.8422e-16	2.28805e-14	yes	up
TRINITY_DN24216_c0_g1	hypothetical protein VOLCADRAFT_110114 [Volvox carteri f. nagariensis]	2.0677	1.04803	4.0676e-08	8.63054e-07	yes	up
TRINITY_DN1289_c0_g1	hypothetical protein KFL_004170140 [Klebsormidium nitens]	3.10955	1.63671	1.70425e-11	6.84152e-10	yes	up
TRINITY_DN26291_c0_g1	hypothetical protein CEUSTIGMA_g11625.t1 [Chlamydomonas eustigma]	2.13459	1.09396	0.0123807	0.0460536	yes	up
TRINITY_DN26211_c0_g1	DNA topoisomerase 2-binding 1-A isoform X1 [Micractinium conductrix]	2.8945	1.53332	0.000957533	0.00566638	yes	up
TRINITY_DN4018_c0_g1	ferredoxin--nitrite reductase [Chlorella sorokiniana]	5.50562	2.46091	0.000364238	0.00251582	yes	up
TRINITY_DN7850_c0_g1	hypothetical protein VOLCADRAFT_104207 [Volvox carteri f. nagariensis]	2.03902	1.02788	8.90119e-05	0.00075684	yes	up
TRINITY_DN3289_c0_g2	DEAD-box RNA helicase family protein [Klebsormidium nitens]	5.52878	2.46696	0.000904151	0.00540552	yes	up
TRINITY_DN1765_c0_g3	P-loop containing nucleoside triphosphate hydrolase [Raphidocelis subcapitata]	76.0851	6.24954	1.96633e-06	2.76776e-05	yes	up
TRINITY_DN990_c0_g1	hypothetical protein CEUSTIGMA_g12543.t1 [Chlamydomonas eustigma]	2.31048	1.20819	2.37277e-07	4.23469e-06	yes	up
TRINITY_DN23887_c0_g1	DEAD box RNA helicase CiRH22, partial [Chlamydomonas sp. ICE-L]	2.14799	1.10299	4.96606e-10	1.53667e-08	yes	up
TRINITY_DN12452_c0_g1	hypothetical protein CHLRE_16g679800v5 [Chlamydomonas reinhardtii]	2.43348	1.28302	2.3613e-11	9.221e-10	yes	up
TRINITY_DN22276_c0_g1	hypothetical protein CEUSTIGMA_g10130.t1 [Chlamydomonas eustigma]	3.66443	1.87359	2.16404e-15	1.52946e-13	yes	up
TRINITY_DN9533_c0_g7	hypothetical protein CEUSTIGMA_g332.t1 [Chlamydomonas eustigma]	2.24141	1.16441	4.11059e-06	5.27093e-05	yes	up
TRINITY_DN23189_c0_g1	hypothetical protein, partial [Dunaliella viridis]	2.78242	1.47634	2.8381e-08	6.26005e-07	yes	up
TRINITY_DN25779_c0_g1	adaptin-interacting protein [Chlamydomonas reinhardtii]	2.53731	1.3433	0.000185881	0.00141684	yes	up
TRINITY_DN10210_c0_g1	hypothetical protein CEUSTIGMA_g6748.t1 [Chlamydomonas eustigma]	4.63912	2.21385	0.000626807	0.00397638	yes	up
TRINITY_DN18307_c0_g1	granule-bound starch [Micractinium conductrix]	6.0192	2.58957	5.19408e-05	0.00047621	yes	up
TRINITY_DN16481_c0_g1	granule-bound starch [Micractinium conductrix]	2.85208	1.51201	0.0249498	0.0796847	yes	up
TRINITY_DN15223_c0_g3	acetamidase [Chlorella sorokiniana]	18.9677	4.24547	0.0364869	0.106707	yes	up
TRINITY_DN6356_c0_g4	hypothetical protein H632_c4322p1 [Helicosporidium sp. ATCC 50920]	2.37726	1.2493	0.0272099	0.0850977	yes	up
TRINITY_DN20928_c0_g1	expressed protein [Chlorella variabilis]	2.95878	1.565	0.00225184	0.0114916	yes	up
TRINITY_DN4675_c0_g1	hypothetical protein KFL_000130010 [Klebsormidium nitens]	35.6867	5.15732	3.81058e-86	1.43411e-82	yes	up
TRINITY_DN5208_c0_g1	hypothetical protein COCSUDRAFT_65304 [Coccomyxa subellipsoidea C-169]	2.28452	1.19189	3.32425e-05	0.00032401	yes	up
TRINITY_DN419_c0_g2	hypothetical protein APUTEX25_004918 [Auxenochlorella protothecoides]	2.09566	1.0674	3.70387e-11	1.39395e-09	yes	up
TRINITY_DN12503_c0_g1	hypothetical protein APUTEX25_003590 [Auxenochlorella protothecoides]	2.60299	1.38017	3.73303e-05	0.000358742	yes	up
TRINITY_DN9730_c0_g2	DUF2358 family [Chlorella sorokiniana]	2.10092	1.07102	2.83055e-05	0.000282059	yes	up
TRINITY_DN16708_c0_g1	cytidylate kinase [Raphidocelis subcapitata]	44.2409	5.46731	0.000799099	0.00486931	yes	up
TRINITY_DN4449_c0_g1	ubiquitin-like-specific protease 2A [Micractinium conductrix]	2.97908	1.57487	1.07328e-13	6.00638e-12	yes	up
TRINITY_DN21100_c0_g1	predicted protein [Chlamydomonas reinhardtii]	2.00761	1.00548	6.15466e-09	1.54421e-07	yes	up
TRINITY_DN17415_c0_g1	hypothetical protein C2E21_4925 [Chlorella sorokiniana]	3.25198	1.70132	2.1975e-18	2.29731e-16	yes	up
TRINITY_DN15352_c0_g1	hypothetical protein C2E21_6131 [Chlorella sorokiniana]	2.06807	1.04828	3.57451e-06	4.6549e-05	yes	up
TRINITY_DN14303_c0_g1	hypothetical protein CHLNCDRAFT_56997 [Chlorella variabilis]	2.74957	1.45921	3.53532e-07	6.01704e-06	yes	up
TRINITY_DN9059_c0_g1	predicted protein [Chlamydomonas reinhardtii]	2.17411	1.12042	1.32108e-10	4.48423e-09	yes	up
TRINITY_DN7930_c0_g1	hypothetical protein CEUSTIGMA_g3702.t1 [Chlamydomonas eustigma]	2.12696	1.08879	0.00729397	0.0300872	yes	up
TRINITY_DN7286_c0_g3	hypothetical protein Rsub_08999 [Raphidocelis subcapitata]	2.27719	1.18726	0.0069153	0.0288374	yes	up
TRINITY_DN1566_c0_g1	cysteine desulfurase [Chlorella sorokiniana]	2.53699	1.34312	1.21334e-27	3.47915e-25	yes	up
TRINITY_DN17538_c1_g1	cysteine desulfurase [Chlorella sorokiniana]	2.43998	1.28687	8.64751e-09	2.11846e-07	yes	up
TRINITY_DN5728_c0_g1	hypothetical protein CEUSTIGMA_g1575.t1 [Chlamydomonas eustigma]	2.03483	1.02491	0.0271812	0.0850345	yes	up
TRINITY_DN8013_c0_g2	expressed protein [Chlorella variabilis]	2.48934	1.31576	2.88281e-15	1.95213e-13	yes	up
TRINITY_DN518_c0_g2	hypothetical protein TSOC_004925 [Tetrabaena socialis]	2.5718	1.36278	0.0126134	0.0467114	yes	up
TRINITY_DN10092_c0_g5	hypothetical protein CHLNCDRAFT_137663 [Chlorella variabilis]	6.46477	2.6926	6.31258e-16	4.88584e-14	yes	up
TRINITY_DN14543_c0_g2	hypothetical protein CEUSTIGMA_g8858.t1 [Chlamydomonas eustigma]	18.7644	4.22992	0.0412165	1	yes	up
TRINITY_DN5659_c0_g2	Epidermal growth factor receptor substrate 15 [Chlorella sorokiniana]	2.08111	1.05735	1.38424e-11	5.60169e-10	yes	up
TRINITY_DN16490_c0_g1	hypothetical protein CEUSTIGMA_g5165.t1 [Chlamydomonas eustigma]	2.06651	1.0472	3.66033e-05	0.000352657	yes	up
TRINITY_DN24407_c0_g1	SET domain-containing [Micractinium conductrix]	2.28412	1.19164	0.0296754	0.0909195	yes	up
TRINITY_DN13179_c0_g2	hypothetical protein CHLRE_07g339100v5 [Chlamydomonas reinhardtii]	2.5023	1.32326	0.00616864	0.026303	yes	up
TRINITY_DN24342_c0_g1	hypothetical protein CHLNCDRAFT_138805 [Chlorella variabilis]	23.5934	4.56031	0.0210469	0.0697731	yes	up
TRINITY_DN3551_c0_g1	hypothetical protein CHLNCDRAFT_133091 [Chlorella variabilis]	3.12401	1.6434	5.91843e-08	1.20645e-06	yes	up
TRINITY_DN19795_c0_g1	calcium calmodulin-dependent kinase kinase 1-like isoform X4 [Micractinium conductrix]	2.07796	1.05517	0.00408412	0.0187161	yes	up
TRINITY_DN12219_c0_g2	PHOTOPERIOD-INDEPENDENT EARLY FLOWERING 1 isoform X1 isoform B [Chlorella sorokiniana]	2.65187	1.40701	4.1264e-16	3.26941e-14	yes	up
TRINITY_DN10436_c0_g1	hypothetical protein CHLNCDRAFT_50360 [Chlorella variabilis]	5.38138	2.42798	4.24513e-12	1.86587e-10	yes	up
TRINITY_DN19642_c0_g1	hypothetical protein CHLNCDRAFT_21117, partial [Chlorella variabilis]	2.42686	1.27909	4.61282e-05	0.000430778	yes	up
TRINITY_DN9597_c0_g1	ATP-dependent chaperone [Chlorella sorokiniana]	2.09489	1.06687	0.0392096	0.113088	yes	up
TRINITY_DN3306_c0_g1	ATPase family AAA domain-containing protein [Micractinium conductrix]	3.75398	1.90842	0.00881067	0.0350484	yes	up
TRINITY_DN4060_c0_g1	hypothetical protein CHLRE_17g735800v5 [Chlamydomonas reinhardtii]	2.07979	1.05644	0.000495255	0.00327358	yes	up
TRINITY_DN8359_c0_g2	hypothetical protein C2E20_4806 [Micractinium conductrix]	4.00532	2.00192	0.0265529	0.0835987	yes	up
TRINITY_DN14992_c0_g1	hypothetical protein Rsub_06573 [Raphidocelis subcapitata]	2.29103	1.19599	5.41825e-07	8.8473e-06	yes	up
TRINITY_DN4487_c1_g4	hypothetical protein CEUSTIGMA_g12374.t1 [Chlamydomonas eustigma]	2.444	1.28924	0.00389327	0.0179923	yes	up
TRINITY_DN1295_c1_g1	hypothetical protein CEUSTIGMA_g7690.t1 [Chlamydomonas eustigma]	2.53124	1.33984	2.19918e-07	3.96246e-06	yes	up
TRINITY_DN3150_c0_g2	hypothetical protein CEUSTIGMA_g7690.t1 [Chlamydomonas eustigma]	2.20965	1.14382	0.0020271	0.010605	yes	up
TRINITY_DN20831_c0_g1	hypothetical protein VOLCADRAFT_79148 [Volvox carteri f. nagariensis]	2.07705	1.05453	2.1244e-09	5.82901e-08	yes	up
TRINITY_DN6910_c0_g1	hypothetical protein CEUSTIGMA_g8421.t1 [Chlamydomonas eustigma]	2.21039	1.1443	1.1671e-09	3.36904e-08	yes	up
TRINITY_DN8220_c0_g3	translational initiation factor 1 (plastid) [Chlorella heliozoae]	17.6037	4.1378	0.01774	0.0611047	yes	up
TRINITY_DN14955_c0_g2	hypothetical protein CEUSTIGMA_g2155.t1 [Chlamydomonas eustigma]	2.08728	1.06162	0.00144403	0.00798618	yes	up
TRINITY_DN9955_c0_g1	transcription elongation factor 1-like protein [Chlorella sorokiniana]	2.14566	1.10142	0.00139401	0.00776522	yes	up
TRINITY_DN26128_c0_g1	predicted protein [Micromonas commoda]	2.45796	1.29746	0.0398814	0.114455	yes	up
TRINITY_DN3159_c0_g1	hypothetical protein CEUSTIGMA_g531.t1 [Chlamydomonas eustigma]	2.25714	1.1745	8.47304e-06	9.90727e-05	yes	up
TRINITY_DN410_c0_g2	hypothetical protein CEUSTIGMA_g12099.t1 [Chlamydomonas eustigma]	3.8654	1.95062	2.68973e-07	4.74413e-06	yes	up
TRINITY_DN410_c0_g6	hypothetical protein CEUSTIGMA_g12099.t1 [Chlamydomonas eustigma]	2.47342	1.3065	0.0251817	0.0802462	yes	up
TRINITY_DN10556_c0_g4	AP2-like ethylene-responsive transcription factor AIL5 [Tetrabaena socialis]	4.67419	2.22472	0.0302646	0.0923023	yes	up
TRINITY_DN9471_c0_g1	hypothetical protein CHLRE_12g548250v5 [Chlamydomonas reinhardtii]	3.56445	1.83368	3.43744e-12	1.53325e-10	yes	up
TRINITY_DN10686_c0_g1	hypothetical protein CEUSTIGMA_g11682.t1 [Chlamydomonas eustigma]	2.10264	1.0722	0.0031137	0.0150429	yes	up
TRINITY_DN12748_c0_g2	RNA-binding Nova-1 [Micractinium conductrix]	2.802	1.48646	4.22146e-16	3.33595e-14	yes	up
TRINITY_DN24850_c0_g1	E3 ubiquitin- ligase ORTHRUS 2-like [Chlorella sorokiniana]	7.73102	2.95066	1.57546e-24	3.16226e-22	yes	up
TRINITY_DN5530_c0_g1	hypothetical protein H632_c4673p0, partial [Helicosporidium sp. ATCC 50920]	7.67001	2.93923	4.52561e-08	9.47546e-07	yes	up
TRINITY_DN7105_c0_g1	Swr1 complex bromodomain subunit Brf1 isoform A [Chlorella sorokiniana]	2.38968	1.25682	3.38215e-11	1.28898e-09	yes	up
TRINITY_DN808_c0_g1	ult-like transcription factor [Micractinium conductrix]	2.3235	1.2163	5.61668e-14	3.29643e-12	yes	up
TRINITY_DN6898_c0_g1	PHD-finger family homeodomain [Micractinium conductrix]	2.02333	1.01673	2.06596e-05	0.000215306	yes	up
TRINITY_DN13593_c0_g1	methyl- -binding domain-containing 9 [Chlorella sorokiniana]	2.29074	1.19581	1.7972e-05	0.000191269	yes	up
TRINITY_DN2953_c0_g1	methyl- -binding domain-containing 9 [Chlorella sorokiniana]	2.50108	1.32255	0.000236665	0.00173985	yes	up
TRINITY_DN344_c0_g1	hypothetical protein CHLNCDRAFT_54503 [Chlorella variabilis]	2.50022	1.32206	2.90393e-13	1.50484e-11	yes	up
TRINITY_DN13593_c0_g2	hypothetical protein APUTEX25_002904, partial [Auxenochlorella protothecoides]	2.22808	1.1558	0.000477111	0.00317053	yes	up
TRINITY_DN3821_c0_g1	hypothetical protein CHLRE_01g048850v5 [Chlamydomonas reinhardtii]	3.24979	1.70035	5.5734e-05	0.000505434	yes	up
TRINITY_DN4424_c1_g1	hypothetical protein CEUSTIGMA_g2378.t1 [Chlamydomonas eustigma]	2.80605	1.48854	2.88985e-08	6.3602e-07	yes	up
TRINITY_DN10017_c0_g2	histone-lysine N-methyltransferase ATX2-like [Chlorella sorokiniana]	2.18585	1.12819	8.88417e-05	0.00075582	yes	up
TRINITY_DN26202_c0_g1	CHROMATIN REMODELING 5 isoform A [Chlorella sorokiniana]	2.01848	1.01327	1.83767e-10	6.06671e-09	yes	up
TRINITY_DN7464_c0_g1	Myb L [Micractinium conductrix]	3.09373	1.62935	0.000258093	0.00187652	yes	up
TRINITY_DN2586_c0_g1	SNF2 family DNA-dependent ATPase [Chlorella sorokiniana]	3.18708	1.67223	7.09825e-18	6.89401e-16	yes	up
TRINITY_DN5122_c0_g1	transcription factor Myb13 [Chlorella sorokiniana]	3.84899	1.94448	9.63316e-22	1.47226e-19	yes	up
TRINITY_DN9691_c0_g1	LOV domain-containing isoform A [Chlorella sorokiniana]	2.81507	1.49317	6.4433e-13	3.18547e-11	yes	up
TRINITY_DN8913_c0_g2	Histone H2A [Micractinium conductrix]	2.71597	1.44147	8.29828e-05	0.000712823	yes	up
TRINITY_DN3401_c0_g2	hypothetical protein CEUSTIGMA_g12147.t1 [Chlamydomonas eustigma]	2.17938	1.12392	0.000146996	0.00116253	yes	up
TRINITY_DN2171_c0_g1	Myb A [Micractinium conductrix]	4.08864	2.03162	5.18314e-24	9.75336e-22	yes	up
TRINITY_DN454_c0_g1	acyltransferase family [Micractinium conductrix]	2.00779	1.00561	4.26262e-09	1.10447e-07	yes	up
TRINITY_DN24458_c0_g1	hypothetical protein CHLRE_06g278208v5 [Chlamydomonas reinhardtii]	2.23679	1.16143	1.32988e-08	3.14532e-07	yes	up
TRINITY_DN17744_c0_g1	hypothetical protein CHLNCDRAFT_57600 [Chlorella variabilis]	4.9593	2.31014	2.69599e-05	0.000270541	yes	up
TRINITY_DN48_c0_g1	lysine-specific demethylase JMJ706 [Chlorella sorokiniana]	2.6797	1.42207	1.11008e-17	1.06441e-15	yes	up
TRINITY_DN3312_c1_g1	hydroxyproline-rich glycoprotein [Chlamydomonas reinhardtii]	2.05579	1.03969	0.0104273	0.040167	yes	up
TRINITY_DN13203_c0_g2	hypothetical protein CHLNCDRAFT_142883 [Chlorella variabilis]	2.21418	1.14677	0.000105259	0.000873042	yes	up
TRINITY_DN19069_c0_g1	hypothetical protein CHLNCDRAFT_25365, partial [Chlorella variabilis]	2.27945	1.18869	6.38598e-08	1.29213e-06	yes	up
TRINITY_DN12127_c1_g1	hypothetical protein APUTEX25_002205, partial [Auxenochlorella protothecoides]	2.74857	1.45868	0.000134612	0.00108033	yes	up
TRINITY_DN18131_c0_g1	Transcription factor MYB1R1 [Chlorella sorokiniana]	3.01667	1.59296	3.39182e-10	1.07383e-08	yes	up
TRINITY_DN7610_c4_g1	Squamosa promoter-binding-like protein 3, partial [Tetrabaena socialis]	3.3754	1.75506	0.000163848	0.00127471	yes	up
TRINITY_DN9203_c0_g4	phosphorus starvation response 1 transcriptional regulator [Chlorella sorokiniana]	2.10935	1.0768	4.00776e-13	2.01782e-11	yes	up
TRINITY_DN11749_c0_g3	hypothetical protein CHLNCDRAFT_58236 [Chlorella variabilis]	2.73983	1.45409	0.000170478	0.00131711	yes	up
TRINITY_DN5359_c0_g2	hypothetical protein CHLNCDRAFT_142107 [Chlorella variabilis]	4.13783	2.04887	0.00105558	0.00614016	yes	up
TRINITY_DN5359_c0_g1	Histone-lysine N-H3 lysine-9 specific SUVH4 [Micractinium conductrix]	4.66195	2.22093	6.86941e-20	8.72676e-18	yes	up
TRINITY_DN11724_c0_g1	WD-40 repeat-containing protein MSI1 [Auxenochlorella protothecoides]	2.07191	1.05096	2.30765e-06	3.174e-05	yes	up
TRINITY_DN9011_c0_g1	cyclin-like protein [Coccomyxa subellipsoidea C-169]	4.15289	2.05412	2.61692e-18	2.71691e-16	yes	up
TRINITY_DN3829_c0_g2	hypothetical protein CHLNCDRAFT_56362 [Chlorella variabilis]	59.4902	5.89458	8.44736e-05	0.000724849	yes	up
TRINITY_DN2782_c0_g5	predicted protein, partial [Chlamydomonas reinhardtii]	2.04558	1.03251	0.00256855	0.0128249	yes	up
TRINITY_DN10438_c0_g1	hypothetical protein CEUSTIGMA_g5791.t1 [Chlamydomonas eustigma]	3.44141	1.783	3.97374e-15	2.6528e-13	yes	up
TRINITY_DN6291_c0_g6	mitochondrial Mn superoxide dismutase [Haematococcus lacustris]	2.11414	1.08007	1.95787e-11	7.80764e-10	yes	up
TRINITY_DN20600_c0_g1	predicted protein [Chlamydomonas reinhardtii]	2.06916	1.04904	0.000194981	0.00147722	yes	up
TRINITY_DN4507_c0_g2	hypothetical protein BW920_0084 (mitochondrion) [Auxenochlorella protothecoides]	3.59139	1.84454	0.000973988	0.00574997	yes	up
TRINITY_DN4484_c0_g2	hypothetical protein (mitochondrion) [Picochlorum sp. 'soloecismus']	10.2064	3.3514	1.61072e-05	0.000174456	yes	up
TRINITY_DN3125_c0_g3	hypothetical protein (mitochondrion) [Botryococcus braunii]	139.455	7.12365	1.42583e-19	1.73802e-17	yes	up
TRINITY_DN10971_c0_g1	Cu/Zn superoxide dismutase [Dunaliella salina]	2.51307	1.32945	6.75801e-16	5.20384e-14	yes	up
TRINITY_DN16177_c0_g4	cytochrome c oxidase subunit II (mitochondrion) [Chlorella sorokiniana]	3.13199	1.64708	0.00201483	0.0105482	yes	up
TRINITY_DN16177_c0_g3	cytochrome c oxidase subunit II (mitochondrion) [Chlorella sorokiniana]	3.86525	1.95056	1.04467e-22	1.71874e-20	yes	up
TRINITY_DN914_c0_g1	hypothetical protein CEUSTIGMA_g11413.t1 [Chlamydomonas eustigma]	2.0784	1.05547	6.03048e-10	1.83215e-08	yes	up
TRINITY_DN3772_c0_g2	hypothetical protein CHLNCDRAFT_137274 [Chlorella variabilis]	2.03388	1.02423	1.876e-11	7.50103e-10	yes	up
TRINITY_DN4517_c0_g1	hypothetical protein CHLRE_13g579500v5 [Chlamydomonas reinhardtii]	2.20531	1.14098	3.33076e-07	5.72389e-06	yes	up
TRINITY_DN3219_c2_g3	predicted protein [Chlamydomonas reinhardtii]	2.79003	1.48028	0.0023353	0.0118618	yes	up
TRINITY_DN3748_c0_g3	hypothetical protein CEUSTIGMA_g1633.t1 [Chlamydomonas eustigma]	2.10675	1.07502	0.000299462	0.00212797	yes	up
TRINITY_DN26396_c0_g1	predicted protein [Micromonas commoda]	2.25358	1.17222	3.71992e-07	6.30173e-06	yes	up
TRINITY_DN5998_c0_g2	Serine threonine- kinase fray2 [Chlorella sorokiniana]	2.05132	1.03656	6.98818e-14	3.98485e-12	yes	up
TRINITY_DN5437_c0_g3	hypothetical protein CEUSTIGMA_g1660.t1 [Chlamydomonas eustigma]	2.2551	1.17319	0.000153456	0.00120611	yes	up
TRINITY_DN4827_c1_g1	oxidoreductase [Micractinium conductrix]	2.32653	1.21818	0.00341359	0.016221	yes	up
TRINITY_DN5651_c0_g1	Mitochondrial Carrier (MC) Family [Micractinium conductrix]	2.12228	1.08562	6.77627e-11	2.43751e-09	yes	up
TRINITY_DN101_c0_g1	Mitochondrial Carrier (MC) Family [Micractinium conductrix]	2.43662	1.28488	1.11702e-06	1.68073e-05	yes	up
TRINITY_DN5730_c0_g1	hypothetical protein APUTEX25_001123 [Auxenochlorella protothecoides]	2.15636	1.1086	1.80724e-08	4.15998e-07	yes	up
TRINITY_DN8964_c0_g1	hypothetical protein VOLCADRAFT_105650 [Volvox carteri f. nagariensis]	7.68706	2.94243	1.88459e-32	7.09265e-30	yes	up
TRINITY_DN18700_c0_g1	hypothetical protein APUTEX25_001994 [Auxenochlorella protothecoides]	7.92318	2.98608	9.55318e-15	6.14588e-13	yes	up
TRINITY_DN2359_c0_g1	hypothetical protein APUTEX25_000241, partial [Auxenochlorella protothecoides]	5.02582	2.32936	2.62104e-54	3.43105e-51	yes	up
TRINITY_DN26081_c0_g1	hypothetical protein APUTEX25_000241, partial [Auxenochlorella protothecoides]	9.03301	3.17521	3.45116e-20	4.47878e-18	yes	up
TRINITY_DN4003_c0_g1	hypothetical protein APUTEX25_000241, partial [Auxenochlorella protothecoides]	3.44812	1.78581	1.46915e-19	1.78359e-17	yes	up
TRINITY_DN2254_c0_g1	hypothetical protein APUTEX25_000241, partial [Auxenochlorella protothecoides]	4.80923	2.26581	4.64591e-15	3.08784e-13	yes	up
TRINITY_DN4346_c0_g2	Glycosyltransferase LARGE2 [Chlorella sorokiniana]	2.35358	1.23486	6.55289e-17	5.7353e-15	yes	up
TRINITY_DN5556_c0_g2	Ubiquitin-conjugating enzyme E2 E1 [Chlorella sorokiniana]	2.93176	1.55176	7.44259e-12	3.13839e-10	yes	up
TRINITY_DN9793_c0_g1	predicted protein [Ostreococcus lucimarinus CCE9901]	2.32592	1.2178	1.03436e-09	3.0206e-08	yes	up
TRINITY_DN26248_c0_g1	hypothetical protein VOLCADRAFT_105650 [Volvox carteri f. nagariensis]	4.2061	2.07248	2.35674e-24	4.57785e-22	yes	up
TRINITY_DN4077_c0_g3	hypothetical protein COCSUDRAFT_56571 [Coccomyxa subellipsoidea C-169]	5.91603	2.56463	2.6633e-16	2.16137e-14	yes	up
TRINITY_DN20602_c0_g1	hypothetical protein GPECTOR_24g229 [Gonium pectorale]	3.01496	1.59214	1.03625e-17	9.98861e-16	yes	up
TRINITY_DN2611_c0_g8	hypothetical protein CEUSTIGMA_g1561.t1 [Chlamydomonas eustigma]	2.43789	1.28563	0.000177811	0.00136465	yes	up
TRINITY_DN6112_c0_g1	hypothetical protein CHLNCDRAFT_135020 [Chlorella variabilis]	2.51648	1.33141	4.24701e-08	8.96696e-07	yes	up
TRINITY_DN4701_c0_g1	hypothetical protein CEUSTIGMA_g10214.t1 [Chlamydomonas eustigma]	4.39963	2.13738	1.68974e-06	2.42295e-05	yes	up
TRINITY_DN8685_c0_g1	diacylglycerol acyltransferase [Raphidocelis subcapitata]	2.41074	1.26947	3.65897e-11	1.38224e-09	yes	up
TRINITY_DN1705_c0_g1	cytochrome b [Chlorella sorokiniana]	2.33461	1.22318	1.80321e-12	8.40418e-11	yes	up
TRINITY_DN6756_c0_g6	hypothetical protein CEUSTIGMA_g8181.t1 [Chlamydomonas eustigma]	2.0582	1.04138	1.07926e-07	2.06707e-06	yes	up
TRINITY_DN13788_c0_g1	hypothetical protein CEUSTIGMA_g1152.t1 [Chlamydomonas eustigma]	2.1611	1.11176	0.00223631	0.0114393	yes	up
TRINITY_DN16806_c0_g1	ADIPOR-like receptor [Tetrabaena socialis]	3.13411	1.64806	0.0350498	0.103364	yes	up
TRINITY_DN3621_c0_g1	hypothetical protein Rsub_06813 [Raphidocelis subcapitata]	2.34042	1.22677	9.45583e-09	2.29965e-07	yes	up
TRINITY_DN6607_c0_g1	hypothetical protein Rsub_06813 [Raphidocelis subcapitata]	3.61311	1.85324	6.6387e-11	2.39662e-09	yes	up
TRINITY_DN8845_c0_g2	hypothetical protein COCSUDRAFT_56571 [Coccomyxa subellipsoidea C-169]	2.44422	1.28938	7.7626e-09	1.91571e-07	yes	up
TRINITY_DN20213_c0_g1	glycosyltransferase family 92 [Micractinium conductrix]	2.64149	1.40135	3.97856e-07	6.69572e-06	yes	up
TRINITY_DN25696_c0_g1	hypothetical protein VOLCADRAFT_121638 [Volvox carteri f. nagariensis]	2.64373	1.40258	4.18007e-07	6.98799e-06	yes	up
TRINITY_DN22823_c0_g1	rhomboid-related 4 isoform X1 [Micractinium conductrix]	2.40721	1.26736	5.37474e-05	0.000491116	yes	up
TRINITY_DN7065_c0_g1	hypothetical protein APUTEX25_005769, partial [Auxenochlorella protothecoides]	2.23327	1.15916	4.89162e-14	2.90487e-12	yes	up
TRINITY_DN5678_c0_g1	peptidase S8 [Raphidocelis subcapitata]	13.2043	3.72293	0.0349105	0.103015	yes	up
TRINITY_DN8294_c0_g3	chymotrypsin-1-like isoform X1 [Chlorella sorokiniana]	2.2176	1.149	1.05743e-14	6.7167e-13	yes	up
TRINITY_DN6172_c0_g6	hypothetical protein CHLRE_07g314300v5 [Chlamydomonas reinhardtii]	2.16429	1.1139	0.000833714	0.00504349	yes	up
TRINITY_DN11098_c0_g1	hypothetical protein CHLNCDRAFT_35559 [Chlorella variabilis]	38.5503	5.26867	0.00177606	0.00950707	yes	up
TRINITY_DN10800_c0_g1	N-methyltryptophan oxidase isoform A [Chlorella sorokiniana]	43.6507	5.44793	1.74632e-08	4.03207e-07	yes	up
TRINITY_DN12871_c0_g1	hypothetical protein CEUSTIGMA_g7268.t1 [Chlamydomonas eustigma]	2.17682	1.12222	0.00831607	0.0334778	yes	up
TRINITY_DN11884_c0_g1	Transposon TX1 uncharacterized protein, partial [Tetrabaena socialis]	4.74759	2.2472	4.76519e-06	5.99041e-05	yes	up
TRINITY_DN4512_c0_g1	Transposon TX1 uncharacterized protein [Tetrabaena socialis]	3.36356	1.74999	0.00578149	0.0249204	yes	up
TRINITY_DN8338_c0_g1	Magnesium transporter MRS2-4 [Micractinium conductrix]	2.01525	1.01096	0.00744299	0.0305638	yes	up
TRINITY_DN1269_c0_g1	hypothetical protein CHLNCDRAFT_142539 [Chlorella variabilis]	2.02734	1.01959	2.13633e-13	1.1344e-11	yes	up
TRINITY_DN3312_c1_g3	hypothetical protein CHLNCDRAFT_144357, partial [Chlorella variabilis]	2.22504	1.15383	0.0162012	0.0570376	yes	up
TRINITY_DN9676_c0_g1	hypothetical protein Rsub_02384 [Raphidocelis subcapitata]	3.53767	1.8228	7.60478e-11	2.70644e-09	yes	up
TRINITY_DN6258_c0_g1	hypothetical protein CEUSTIGMA_g7413.t1 [Chlamydomonas eustigma]	2.16304	1.11306	0.033114	0.0991149	yes	up
TRINITY_DN3853_c1_g1	Phosphatidylinositol 4-phosphate 5-kinase 2 [Micractinium conductrix]	2.74775	1.45825	4.81964e-19	5.45525e-17	yes	up
TRINITY_DN2032_c0_g1	nucleotide-diphospho-sugar transferase domain [Micractinium conductrix]	2.05006	1.03567	1.6994e-08	3.92976e-07	yes	up
TRINITY_DN22874_c0_g1	dual specificity phosphatase domain [Micractinium conductrix]	2.08088	1.05719	0.000135302	0.00108429	yes	up
TRINITY_DN16978_c2_g1	hypothetical protein CEUSTIGMA_g2882.t1 [Chlamydomonas eustigma]	2.2395	1.16318	2.21082e-07	3.98106e-06	yes	up
TRINITY_DN12173_c0_g1	hypothetical protein CEUSTIGMA_g8349.t1 [Chlamydomonas eustigma]	2.02799	1.02005	0.0148652	0.0531987	yes	up
TRINITY_DN4791_c0_g1	hypothetical protein CEUSTIGMA_g577.t1 [Chlamydomonas eustigma]	2.13209	1.09227	0.000256376	0.00186704	yes	up
TRINITY_DN13841_c0_g2	Peptide-N(4)-(N-acetyl-beta-glucosaminyl)asp aragine amidase [Chlorella sorokiniana]	2.30696	1.20599	2.17654e-05	0.000225117	yes	up
TRINITY_DN10800_c0_g3	Monomeric sarcosine oxidase [Auxenochlorella protothecoides]	17.3815	4.11948	6.49398e-16	5.01336e-14	yes	up
TRINITY_DN7876_c0_g1	HCR2 [Alvikia littoralis]	2.69874	1.43228	7.22838e-06	8.5682e-05	yes	up
TRINITY_DN10182_c0_g1	glyoxal reductase [Chlorella sorokiniana]	2.35462	1.23549	4.98639e-16	3.89949e-14	yes	up
TRINITY_DN7303_c0_g1	CMF receptor CMFR1 [Micractinium conductrix]	2.67719	1.42072	2.21098e-13	1.17198e-11	yes	up
TRINITY_DN867_c0_g2	aldehyde dehydrogenase 22A1-like isoform X1 [Micractinium conductrix]	3.8899	1.95973	2.15957e-26	5.28622e-24	yes	up
TRINITY_DN6714_c0_g1	equilibrative nucleoside transporter [Raphidocelis subcapitata]	2.00344	1.00248	1.97867e-05	0.000207719	yes	up
TRINITY_DN5006_c0_g1	hypothetical protein APUTEX25_000024 [Auxenochlorella protothecoides]	2.18719	1.12908	0.000283662	0.00203394	yes	up
TRINITY_DN2488_c0_g1	Neurotransmitter:Sodium symporter family [Micromonas commoda]	3.95232	1.9827	1.53439e-19	1.85532e-17	yes	up
TRINITY_DN3026_c0_g1	internal alternative NAD(P)H-ubiquinone oxidoreductase mitochondrial-like [Micractinium conductrix]	2.70943	1.43799	2.05839e-07	3.7244e-06	yes	up
TRINITY_DN2896_c0_g1	hypothetical protein CHLRE_07g356250v5 [Chlamydomonas reinhardtii]	2.59777	1.37727	2.68491e-11	1.03505e-09	yes	up
TRINITY_DN13542_c0_g2	hypothetical protein VOLCADRAFT_117774 [Volvox carteri f. nagariensis]	2.17137	1.1186	0.00773325	0.03157	yes	up
TRINITY_DN13898_c0_g3	hypothetical protein CHLNCDRAFT_138543 [Chlorella variabilis]	13.4047	3.74466	2.89385e-05	0.000287836	yes	up
TRINITY_DN9399_c0_g1	hypothetical protein CBR_g38213 [Chara braunii]	4.50282	2.17083	2.35563e-23	4.05276e-21	yes	up
TRINITY_DN2805_c0_g1	U-box domain-containing 4 [Chlorella sorokiniana]	2.01718	1.01234	8.99238e-06	0.000104574	yes	up
TRINITY_DN11923_c0_g1	hypothetical protein GPECTOR_40g551 [Gonium pectorale]	9.82212	3.29603	1.80937e-55	2.47621e-52	yes	up
TRINITY_DN8036_c0_g1	predicted protein [Bathycoccus prasinos]	18.4267	4.20373	0.0119693	0.044861	yes	up
TRINITY_DN4158_c0_g2	Zinc transporter 5 [Micractinium conductrix]	3.7006	1.88776	4.00917e-14	2.39976e-12	yes	up
TRINITY_DN8224_c0_g2	Zinc transporter 5 [Micractinium conductrix]	65.2313	6.02749	8.01015e-05	0.000691427	yes	up
TRINITY_DN9433_c0_g1	transmembrane E3 ubiquitin- ligase 1-like [Chlorella sorokiniana]	14.1897	3.82678	0.0136948	0.0497795	yes	up
TRINITY_DN4581_c0_g3	magnesium transporter MRS2-7 isoform A [Micractinium conductrix]	2.02356	1.01689	9.14815e-10	2.69503e-08	yes	up
TRINITY_DN5232_c0_g2	hypothetical protein CHLNCDRAFT_134736 [Chlorella variabilis]	2.28132	1.18987	0.003293	0.0157448	yes	up
TRINITY_DN20788_c0_g1	PHD finger protein isoform C [Chlorella sorokiniana]	2.39276	1.25868	0.000244783	0.00179579	yes	up
TRINITY_DN8864_c0_g1	hypothetical protein CHLNCDRAFT_28462 [Chlorella variabilis]	2.20238	1.13906	2.63667e-13	1.38061e-11	yes	up
TRINITY_DN674_c0_g10	hypothetical protein VOLCADRAFT_107736 [Volvox carteri f. nagariensis]	2.91771	1.54484	2.01158e-11	7.97953e-10	yes	up
TRINITY_DN19166_c0_g1	Meiotic nuclear division 1 [Chlorella sorokiniana]	2.01456	1.01046	8.70197e-05	0.000741997	yes	up
TRINITY_DN11512_c0_g1	hypothetical protein F751_5548 [Auxenochlorella protothecoides]	3.10872	1.63632	4.04663e-19	4.70409e-17	yes	up
TRINITY_DN4755_c0_g1	E3 ubiquitin-ligase synoviolin [Micractinium conductrix]	2.22658	1.15483	1.37598e-12	6.51384e-11	yes	up
TRINITY_DN10580_c0_g1	cytochrome b5 [Chlorella sorokiniana]	2.6431	1.40223	3.18263e-05	0.00031172	yes	up
TRINITY_DN4075_c0_g1	PHD finger protein isoform C [Chlorella sorokiniana]	2.82031	1.49585	0.00543915	0.0236582	yes	up
TRINITY_DN3659_c0_g1	hypothetical protein C2E21_8299 [Chlorella sorokiniana]	2.10746	1.07551	0.000144233	0.00114428	yes	up
TRINITY_DN4179_c0_g2	hypothetical protein COCSUDRAFT_67435 [Coccomyxa subellipsoidea C-169]	2.30594	1.20535	0.00604842	0.0258563	yes	up
TRINITY_DN5362_c0_g5	hypothetical protein CEUSTIGMA_g9558.t1 [Chlamydomonas eustigma]	2.56159	1.35704	0.00332126	0.0158624	yes	up
TRINITY_DN18889_c0_g1	hypothetical protein CHLNCDRAFT_22876 [Chlorella variabilis]	161.665	7.33686	2.18659e-08	4.93877e-07	yes	up
TRINITY_DN3148_c0_g1	hypothetical protein CEUSTIGMA_g12282.t1 [Chlamydomonas eustigma]	3.28979	1.71799	6.49285e-17	5.69932e-15	yes	up
TRINITY_DN14324_c0_g1	SET domain-containing [Micractinium conductrix]	2.45477	1.29559	1.12369e-05	0.000127716	yes	up
TRINITY_DN4603_c1_g3	hypothetical protein CHLRE_06g255050v5 [Chlamydomonas reinhardtii]	2.65133	1.40672	4.12714e-08	8.73839e-07	yes	up
TRINITY_DN996_c0_g1	ankyrin repeat domain-containing 27 [Chlorella sorokiniana]	2.32579	1.21772	2.03741e-20	2.75077e-18	yes	up
TRINITY_DN1339_c1_g1	kinase domain [Chlorella sorokiniana]	2.09798	1.069	0.000598609	0.00382815	yes	up
TRINITY_DN1172_c0_g1	hypothetical protein VOLCADRAFT_104017 [Volvox carteri f. nagariensis]	2.33866	1.22568	0.00201129	0.0105333	yes	up
TRINITY_DN7476_c0_g1	hypothetical protein CHLNCDRAFT_142876 [Chlorella variabilis]	2.62503	1.39233	0.0236175	0.0763507	yes	up
TRINITY_DN11254_c0_g9	aarF domain-containing kinase [Raphidocelis subcapitata]	4.44423	2.15193	6.39388e-12	2.72673e-10	yes	up
TRINITY_DN3661_c0_g1	3-deoxy-manno-octulosonate mitochondrial isoform B [Chlorella sorokiniana]	2.14098	1.09827	7.46664e-06	8.82628e-05	yes	up
TRINITY_DN449_c0_g1	hypothetical protein CHLNCDRAFT_138045 [Chlorella variabilis]	2.35976	1.23864	1.12185e-11	4.58924e-10	yes	up
TRINITY_DN26203_c0_g1	hypothetical protein CEUSTIGMA_g8929.t1 [Chlamydomonas eustigma]	2.08463	1.05979	5.46847e-06	6.7505e-05	yes	up
TRINITY_DN14818_c0_g1	hypothetical protein Rsub_01881 [Raphidocelis subcapitata]	2.25063	1.17033	6.29366e-05	0.000561783	yes	up
TRINITY_DN25674_c0_g1	hypothetical protein CHLNCDRAFT_142297 [Chlorella variabilis]	2.04797	1.03419	0.00121342	0.00691661	yes	up
TRINITY_DN11712_c0_g1	hypothetical protein CHLNCDRAFT_133686 [Chlorella variabilis]	4.75626	2.24983	1.72932e-12	8.12267e-11	yes	up
TRINITY_DN7139_c0_g2	hypothetical protein CHLNCDRAFT_137064 [Chlorella variabilis]	2.30388	1.20407	3.31153e-07	5.69734e-06	yes	up
TRINITY_DN4441_c0_g2	Bet v1 [Chlorella sorokiniana]	13.1448	3.71642	1.37484e-12	6.51384e-11	yes	up
TRINITY_DN4317_c0_g1	Serine threonine- kinase CTR1 [Chlorella sorokiniana]	2.89601	1.53407	1.03402e-21	1.56443e-19	yes	up
TRINITY_DN21264_c0_g1	hypothetical protein CEUSTIGMA_g2822.t1 [Chlamydomonas eustigma]	2.32422	1.21675	0.0162109	0.0570586	yes	up
TRINITY_DN17090_c0_g1	DNA repair and recombination RAD54 [Micractinium conductrix]	3.16871	1.66389	8.28632e-08	1.63382e-06	yes	up
TRINITY_DN13030_c0_g1	CHROMATIN REMODELING 25 [Chlorella sorokiniana]	2.64408	1.40277	9.49372e-06	0.000109684	yes	up
TRINITY_DN3098_c0_g1	hypothetical protein CHLNCDRAFT_57026 [Chlorella variabilis]	2.19686	1.13544	0.0294204	0.0903498	yes	up
TRINITY_DN15144_c0_g1	hypothetical protein CHLNCDRAFT_138182 [Chlorella variabilis]	3.14668	1.65383	0.000742424	0.00458239	yes	up
TRINITY_DN6902_c0_g1	hypothetical protein CHLNCDRAFT_138182 [Chlorella variabilis]	2.11279	1.07915	1.52435e-06	2.21501e-05	yes	up
TRINITY_DN1792_c0_g7	hypothetical protein VOLCADRAFT_80369 [Volvox carteri f. nagariensis]	2.01987	1.01426	9.60673e-05	0.00080568	yes	up
TRINITY_DN7059_c0_g2	RNA helicase [Chlorella sorokiniana]	16.9573	4.08383	1.22954e-07	2.32386e-06	yes	up
TRINITY_DN3388_c0_g8	hypothetical protein C2E20_7622 [Micractinium conductrix]	2.79423	1.48245	1.52079e-05	0.000165959	yes	up
TRINITY_DN18263_c0_g1	Far upstream element-binding 2 isoform A [Chlorella sorokiniana]	3.69393	1.88516	6.10109e-06	7.43089e-05	yes	up
TRINITY_DN2826_c0_g1	hypothetical protein H632_c11p2 [Helicosporidium sp. ATCC 50920]	2.83102	1.50132	1.30286e-17	1.22967e-15	yes	up
TRINITY_DN17331_c0_g7	Peptidyl-prolyl cis-trans isomerase FKBP17-2, chloroplastic [Tetrabaena socialis]	2.64623	1.40394	6.42152e-12	2.73464e-10	yes	up
TRINITY_DN10952_c0_g1	hypothetical protein C2E21_4363 [Chlorella sorokiniana]	2.7641	1.46681	2.67144e-13	1.39155e-11	yes	up
TRINITY_DN20917_c0_g1	metacaspase type II [Chlamydomonas reinhardtii]	2.4014	1.26388	3.42865e-09	9.03939e-08	yes	up
TRINITY_DN4410_c0_g2	solute carrier family 31 [Parachlorella kessleri]	25.0409	4.64621	0.00296361	0.0144429	yes	up
TRINITY_DN9353_c0_g2	hypothetical protein CBR_g8910 [Chara braunii]	18.8575	4.23706	0.0358326	1	yes	up
TRINITY_DN659_c0_g2	hypothetical protein VOLCADRAFT_88415 [Volvox carteri f. nagariensis]	2.46884	1.30384	3.90369e-11	1.46184e-09	yes	up
TRINITY_DN10378_c1_g3	Protein yeeZ [Tetrabaena socialis]	2.01714	1.01231	0.00841567	0.0338019	yes	up
TRINITY_DN1928_c0_g2	hypothetical protein CHLNCDRAFT_58231 [Chlorella variabilis]	3.44447	1.78428	9.55488e-17	8.10361e-15	yes	up
TRINITY_DN4853_c0_g1	hypothetical protein CEUSTIGMA_g3435.t1 [Chlamydomonas eustigma]	2.22407	1.1532	0.00538038	0.0234568	yes	up
TRINITY_DN18_c0_g1	E3 ubiquitin-ligase ARI4 [Micractinium conductrix]	2.19519	1.13434	3.67791e-11	1.38591e-09	yes	up
TRINITY_DN1260_c1_g1	hypothetical protein CHLNCDRAFT_142309 [Chlorella variabilis]	2.9936	1.58188	1.08031e-09	3.13959e-08	yes	up
TRINITY_DN1260_c2_g3	hypothetical protein APUTEX25_003369, partial [Auxenochlorella protothecoides]	5.84532	2.54728	5.99271e-23	1.00798e-20	yes	up
TRINITY_DN1260_c1_g2	expressed protein [Chlorella variabilis]	2.15353	1.1067	0.000230171	0.00170145	yes	up
TRINITY_DN4733_c0_g2	hypothetical protein C2E20_8271 [Micractinium conductrix]	2.45788	1.29742	3.4828e-09	9.17238e-08	yes	up
TRINITY_DN2257_c0_g4	hypothetical protein COCSUDRAFT_19282 [Coccomyxa subellipsoidea C-169]	3.71838	1.89468	6.91919e-26	1.64737e-23	yes	up
TRINITY_DN8994_c0_g3	predicted protein [Chlamydomonas reinhardtii]	2.56071	1.35655	3.05752e-05	0.000300836	yes	up
TRINITY_DN419_c0_g1	beta-aspartyl peptidase [Chlorella sorokiniana]	3.73413	1.90077	1.2322e-21	1.83659e-19	yes	up
TRINITY_DN3632_c0_g3	P-loop containing nucleoside triphosphate hydrolase isoform B [Micractinium conductrix]	4.11869	2.04218	0.00398171	0.0183361	yes	up
TRINITY_DN4353_c0_g4	hypothetical protein CHLRE_07g313250v5 [Chlamydomonas reinhardtii]	59.125	5.8857	3.49574e-110	2.63125e-106	yes	up
TRINITY_DN5245_c0_g1	hypothetical protein CEUSTIGMA_g12053.t1 [Chlamydomonas eustigma]	2.05949	1.04229	0.00541981	0.0235897	yes	up
TRINITY_DN24201_c0_g1	Pleiotropic drug resistance 1 [Chlorella sorokiniana]	2.01186	1.00853	0.00237268	0.0120156	yes	up
TRINITY_DN16571_c0_g2	hypothetical protein GPECTOR_3g381 [Gonium pectorale]	4.41036	2.1409	6.56495e-10	1.98651e-08	yes	up
TRINITY_DN933_c0_g1	ATP-binding cassette sub-family G member 2 [Auxenochlorella protothecoides]	4.28944	2.10079	4.07899e-40	2.4562e-37	yes	up
TRINITY_DN9144_c0_g2	hypothetical protein CEUSTIGMA_g2333.t1 [Chlamydomonas eustigma]	2.32157	1.2151	0.016786	0.0585217	yes	up
TRINITY_DN11210_c0_g1	ATP-binding cassette transporter [Coccomyxa subellipsoidea C-169]	3.34518	1.74208	7.09101e-15	4.62113e-13	yes	up
TRINITY_DN6247_c0_g1	tetraspanin family [Micractinium conductrix]	3.55555	1.83007	6.26094e-09	1.56695e-07	yes	up
TRINITY_DN4279_c0_g1	Serine threonine- kinase CTR1 isoform A [Chlorella sorokiniana]	2.33016	1.22043	2.13354e-15	1.51145e-13	yes	up
TRINITY_DN2908_c0_g1	protein kinase [Klebsormidium nitens]	2.10418	1.07326	1.74001e-05	0.000186304	yes	up
TRINITY_DN5513_c0_g1	hypothetical protein KFL_004020030 [Klebsormidium nitens]	2.31494	1.21097	4.99748e-12	2.16807e-10	yes	up
TRINITY_DN2049_c0_g1	hypothetical protein KFL_000050400 [Klebsormidium nitens]	3.86346	1.94989	2.18074e-08	4.92925e-07	yes	up
TRINITY_DN3302_c1_g3	hypothetical protein COCSUDRAFT_66437 [Coccomyxa subellipsoidea C-169]	2.82511	1.49831	7.55817e-16	5.79036e-14	yes	up
TRINITY_DN5048_c0_g11	hypothetical protein CEUSTIGMA_g8443.t1 [Chlamydomonas eustigma]	2.34953	1.23237	9.998e-09	2.41783e-07	yes	up
TRINITY_DN7376_c0_g1	hypothetical protein CEUSTIGMA_g5898.t1, partial [Chlamydomonas eustigma]	3.2838	1.71537	1.51877e-25	3.41247e-23	yes	up
TRINITY_DN843_c0_g2	dual specificity catalytic domain containing [Micractinium conductrix]	4.99558	2.32065	2.06417e-34	9.00697e-32	yes	up
TRINITY_DN7171_c0_g1	Amino acid permease 2 [Chlorella sorokiniana]	2.27186	1.18387	0.049062	0.134483	yes	up
TRINITY_DN4413_c0_g1	DNA-dependent metalloprotease WSS1 [Micractinium conductrix]	2.30511	1.20484	0.00123862	0.00703761	yes	up
TRINITY_DN4882_c0_g1	hypothetical protein CHLNCDRAFT_52534 [Chlorella variabilis]	2.69694	1.43132	2.27059e-13	1.20146e-11	yes	up
TRINITY_DN13165_c0_g6	ABC transporter ATP-binding protein/permease [Ostreococcus tauri]	96.583	6.5937	4.23924e-06	5.41055e-05	yes	up
TRINITY_DN4245_c0_g1	MATE efflux family [Micractinium conductrix]	2.40396	1.26541	5.25335e-08	1.08483e-06	yes	up
TRINITY_DN12409_c0_g1	hypothetical protein CHLNCDRAFT_143078 [Chlorella variabilis]	2.99749	1.58375	8.11077e-08	1.60657e-06	yes	up
TRINITY_DN24450_c0_g1	phosphatase 2C 3 [Chlorella sorokiniana]	4.41936	2.14384	1.37704e-10	4.65842e-09	yes	up
TRINITY_DN17111_c0_g1	CMGC RCK MAK kinase [Chlorella sorokiniana]	10.8291	3.43684	1.25877e-05	0.000140731	yes	up
TRINITY_DN21195_c0_g1	CMGC RCK MAK kinase [Chlorella sorokiniana]	37.1729	5.21618	0.00216796	0.0111635	yes	up
TRINITY_DN11653_c0_g2	Pheophorbide a oxygenase [Klebsormidium nitens]	2.3645	1.24154	0.0246008	0.0788547	yes	up
TRINITY_DN21393_c0_g1	NADH dehydrogenase subunit 6 (mitochondrion) [Micractinium conductrix]	11.6225	3.53885	1.47376e-06	2.14877e-05	yes	up
TRINITY_DN2391_c0_g1	hypothetical protein CEUSTIGMA_g4590.t1 [Chlamydomonas eustigma]	2.32284	1.21589	2.86054e-12	1.29317e-10	yes	up
TRINITY_DN526_c0_g2	Sorting and assembly machinery component 50 [Chlorella sorokiniana]	2.00097	1.0007	0.000530059	0.00346634	yes	up
TRINITY_DN7933_c0_g2	hypothetical protein APUTEX25_004847 [Auxenochlorella protothecoides]	5.29016	2.40331	2.36104e-05	0.000241462	yes	up
TRINITY_DN12975_c0_g1	hypothetical protein APUTEX25_004366 [Auxenochlorella protothecoides]	40.5288	5.34088	0.00137398	0.00767632	yes	up
TRINITY_DN4375_c0_g1	hypothetical protein C2E21_3029 [Chlorella sorokiniana]	2.08227	1.05816	5.33279e-10	1.63836e-08	yes	up
TRINITY_DN5024_c2_g5	hypothetical protein CEUSTIGMA_g11058.t1 [Chlamydomonas eustigma]	8.28425	3.05037	0.000774577	0.00474872	yes	up
TRINITY_DN3332_c0_g1	Calcium sensing chloroplastic [Micractinium conductrix]	2.05975	1.04247	1.13688e-09	3.28496e-08	yes	up
TRINITY_DN7077_c0_g1	Vacuolar amino acid transporter 5 [Auxenochlorella protothecoides]	3.48446	1.80093	0.00200486	0.0105088	yes	up
TRINITY_DN6419_c0_g7	SecY-independent transporter protein (mitochondrion) [Chlorella heliozoae]	3.10241	1.63339	0.00474117	0.0211728	yes	up
TRINITY_DN5173_c1_g1	predicted protein [Chlamydomonas reinhardtii]	2.09513	1.06704	1.5575e-07	2.88396e-06	yes	up
TRINITY_DN4648_c0_g1	hypothetical protein APUTEX25_000127, partial [Auxenochlorella protothecoides]	2.0737	1.05221	3.21625e-05	0.000314705	yes	up
TRINITY_DN25781_c0_g1	beta-1,6-N-acetylglucosaminyltransferase enzyme [Chlorella sorokiniana]	2.77516	1.47257	2.21817e-06	3.07209e-05	yes	up
TRINITY_DN5041_c0_g1	Transcription initiation factor TFIID subunit 13 [Micractinium conductrix]	2.90502	1.53855	5.60482e-31	1.93965e-28	yes	up
TRINITY_DN8716_c0_g2	fanciful K+ uptake-b family transporter [Chlorella sorokiniana]	2.25814	1.17513	2.91683e-10	9.30295e-09	yes	up
TRINITY_DN20900_c0_g1	DNA repair and recombination RAD54B isoform B [Micractinium conductrix]	2.58344	1.36929	5.68097e-14	3.32768e-12	yes	up
TRINITY_DN11554_c0_g2	beta-Ig-H3 fasciclin [Micractinium conductrix]	45.7006	5.51414	4.32736e-08	9.12381e-07	yes	up
TRINITY_DN10923_c0_g1	hypothetical protein CEUSTIGMA_g10183.t1 [Chlamydomonas eustigma]	2.97565	1.5732	8.18209e-20	1.03074e-17	yes	up
TRINITY_DN13590_c0_g1	hypothetical protein CEUSTIGMA_g8010.t1 [Chlamydomonas eustigma]	2.38166	1.25197	3.47654e-07	5.93521e-06	yes	up
TRINITY_DN11828_c0_g1	hypothetical protein Rsub_09022 [Raphidocelis subcapitata]	24.0466	4.58776	0.0294715	0.0904604	yes	up
TRINITY_DN5585_c0_g1	hypothetical protein C2E20_7333 [Micractinium conductrix]	2.39627	1.26079	9.52902e-13	4.62363e-11	yes	up
TRINITY_DN4363_c0_g7	hypothetical protein CEUSTIGMA_g9426.t1 [Chlamydomonas eustigma]	2.11152	1.07828	0.042656	0.120787	yes	up
TRINITY_DN935_c0_g4	tetratricopeptide repeat-containing [Chlorella sorokiniana]	2.27612	1.18658	0.0440098	0.123883	yes	up
TRINITY_DN7382_c0_g4	ribonuclease P [Chlorella sorokiniana]	2.25327	1.17202	2.49046e-15	1.73571e-13	yes	up
TRINITY_DN3540_c0_g1	putative sugar phosphate phosphate translocator [Micractinium conductrix]	2.35312	1.23458	4.9859e-07	8.20303e-06	yes	up
TRINITY_DN122_c0_g1	putative serine incorporator [Micractinium conductrix]	3.02038	1.59473	9.1734e-21	1.29062e-18	yes	up
TRINITY_DN18951_c0_g1	putative membrane protein [Ostreococcus tauri]	6.00349	2.5858	0.00483108	0.0215074	yes	up
TRINITY_DN23894_c0_g1	putative Mannose-P-dolichol utilization defect 1 protein [Monoraphidium neglectum]	2.11096	1.0779	4.64689e-11	1.71247e-09	yes	up
TRINITY_DN22226_c0_g1	predicted protein [Chlamydomonas reinhardtii]	2.53217	1.34037	4.09031e-06	5.24718e-05	yes	up
TRINITY_DN21111_c0_g1	predicted protein [Chlamydomonas reinhardtii]	3.07527	1.62071	7.2407e-10	2.17134e-08	yes	up
TRINITY_DN13868_c0_g1	predicted protein [Chlamydomonas reinhardtii]	2.15179	1.10554	7.57906e-05	0.000660656	yes	up
TRINITY_DN6896_c1_g2	predicted protein [Chlamydomonas reinhardtii]	2.66517	1.41423	0.000231892	0.00171085	yes	up
TRINITY_DN22568_c0_g1	polyadenylate-binding -interacting 7-like [Micractinium conductrix]	2.11715	1.08212	3.88357e-05	0.000371786	yes	up
TRINITY_DN3191_c0_g2	peroxisomal membrane PMP22 [Chlorella sorokiniana]	2.19158	1.13197	0.00162181	0.00882515	yes	up
TRINITY_DN2313_c0_g3	oxysterol-binding -related 1C-like isoform X1 [Chlorella sorokiniana]	2.47868	1.30957	4.11236e-19	4.76211e-17	yes	up
TRINITY_DN7397_c0_g3	monovalent Cation:Proton antiporter-1 family [Micractinium conductrix]	3.0304	1.59951	3.3845e-07	5.80629e-06	yes	up
TRINITY_DN12083_c0_g2	MFS transporter [Raphidocelis subcapitata]	5.60512	2.48674	1.67672e-06	2.40853e-05	yes	up
TRINITY_DN12083_c0_g1	MFS transporter [Raphidocelis subcapitata]	2.07679	1.05436	0.000574262	0.00369916	yes	up
TRINITY_DN8097_c0_g1	Meiotic nuclear division 1 [Chlorella sorokiniana]	2.09833	1.06924	0.000272203	0.00196535	yes	up
TRINITY_DN4352_c0_g1	Lysophosphatidic acid phosphatase type 6 [Chlorella sorokiniana]	2.01494	1.01074	0.00141545	0.00786282	yes	up
TRINITY_DN4049_c0_g1	low CO2-induced [Micractinium conductrix]	2.3153	1.2112	0.00423446	0.0192672	yes	up
TRINITY_DN1885_c0_g1	lipid phosphate phosphatase [Chlorella sorokiniana]	2.48518	1.31335	8.83616e-14	4.97269e-12	yes	up
TRINITY_DN10452_c0_g1	kinetoplast DNA-associated [Micractinium conductrix]	2.69163	1.42848	7.19516e-12	3.04258e-10	yes	up
TRINITY_DN24613_c0_g1	hypothetical protein VOLCADRAFT_91510 [Volvox carteri f. nagariensis]	3.88207	1.95682	8.09398e-11	2.86025e-09	yes	up
TRINITY_DN201_c1_g1	hypothetical protein VOLCADRAFT_84863 [Volvox carteri f. nagariensis]	3.45042	1.78677	1.27139e-18	1.3731e-16	yes	up
TRINITY_DN25839_c0_g1	hypothetical protein VOLCADRAFT_121683 [Volvox carteri f. nagariensis]	2.09293	1.06552	3.11274e-05	0.00030557	yes	up
TRINITY_DN10678_c0_g4	hypothetical protein Rsub_07135 [Raphidocelis subcapitata]	11.593	3.53518	0.000592161	0.00379535	yes	up
TRINITY_DN23978_c0_g1	hypothetical protein MNEG_13591 [Monoraphidium neglectum]	3.76838	1.91394	1.47103e-17	1.37975e-15	yes	up
TRINITY_DN22774_c0_g1	hypothetical protein GPECTOR_70g468 [Gonium pectorale]	2.03373	1.02413	0.0322705	0.0971795	yes	up
TRINITY_DN8388_c0_g1	hypothetical protein GPECTOR_62g920 [Gonium pectorale]	2.64143	1.40132	1.85351e-09	5.146e-08	yes	up
TRINITY_DN9358_c0_g1	hypothetical protein GPECTOR_452g352 [Gonium pectorale]	2.47534	1.30763	0.000568518	0.00366687	yes	up
TRINITY_DN761_c1_g1	hypothetical protein GPECTOR_40g603 [Gonium pectorale]	2.17106	1.1184	1.43297e-05	0.000157173	yes	up
TRINITY_DN5640_c0_g2	hypothetical protein GPECTOR_2g1173 [Gonium pectorale]	2.50043	1.32218	0.000520965	0.00341577	yes	up
TRINITY_DN9197_c2_g1	hypothetical protein GPECTOR_140g681 [Gonium pectorale]	2.23178	1.15819	0.00168704	0.00910273	yes	up
TRINITY_DN9175_c0_g1	hypothetical protein GPECTOR_11g336 [Gonium pectorale]	2.07345	1.05203	0.0477197	0.131751	yes	up
TRINITY_DN18956_c0_g1	hypothetical protein GPECTOR_10g1128 [Gonium pectorale]	2.24047	1.1638	0.00129331	0.00729467	yes	up
TRINITY_DN3289_c0_g1	hypothetical protein F751_3169 [Auxenochlorella protothecoides]	2.01952	1.01401	4.21309e-09	1.09351e-07	yes	up
TRINITY_DN201_c0_g1	hypothetical protein COCSUDRAFT_83498 [Coccomyxa subellipsoidea C-169]	2.35321	1.23463	0.00164757	0.00893621	yes	up
TRINITY_DN115_c0_g1	hypothetical protein COCSUDRAFT_65999 [Coccomyxa subellipsoidea C-169]	2.36603	1.24247	2.32699e-11	9.12254e-10	yes	up
TRINITY_DN2563_c0_g1	hypothetical protein COCSUDRAFT_61299 [Coccomyxa subellipsoidea C-169]	2.0333	1.02382	6.05021e-06	7.37489e-05	yes	up
TRINITY_DN7629_c0_g1	hypothetical protein COCSUDRAFT_60820 [Coccomyxa subellipsoidea C-169]	3.36265	1.7496	1.02642e-11	4.21601e-10	yes	up
TRINITY_DN4860_c0_g2	hypothetical protein COCSUDRAFT_53614 [Coccomyxa subellipsoidea C-169]	2.37928	1.25053	0.000174723	0.00134493	yes	up
TRINITY_DN12938_c0_g1	hypothetical protein COCSUDRAFT_39032 [Coccomyxa subellipsoidea C-169]	5.63288	2.49387	7.0268e-26	1.64737e-23	yes	up
TRINITY_DN17539_c0_g1	hypothetical protein COCSUDRAFT_38953 [Coccomyxa subellipsoidea C-169]	2.33657	1.22439	0.0037878	0.0176237	yes	up
TRINITY_DN9245_c1_g5	hypothetical protein CHLRE_16g664050v5 [Chlamydomonas reinhardtii]	3.88737	1.95879	2.84188e-18	2.92025e-16	yes	up
TRINITY_DN1962_c0_g2	hypothetical protein CHLRE_13g584450v5 [Chlamydomonas reinhardtii]	2.74878	1.45879	2.79092e-24	5.35216e-22	yes	up
TRINITY_DN4090_c1_g1	hypothetical protein CHLRE_12g551000v5 [Chlamydomonas reinhardtii]	2.39075	1.25746	0.000146484	0.00115909	yes	up
TRINITY_DN726_c0_g2	hypothetical protein CHLRE_06g261750v5 [Chlamydomonas reinhardtii]	2.34231	1.22793	1.91102e-17	1.78133e-15	yes	up
TRINITY_DN4603_c1_g1	hypothetical protein CHLRE_06g255050v5 [Chlamydomonas reinhardtii]	2.24554	1.16707	1.62213e-09	4.55589e-08	yes	up
TRINITY_DN14279_c1_g1	hypothetical protein CHLRE_04g214900v5 [Chlamydomonas reinhardtii]	2.6473	1.40452	0.00297244	0.0144813	yes	up
TRINITY_DN11107_c0_g1	hypothetical protein CHLNCDRAFT_56629 [Chlorella variabilis]	2.09265	1.06533	0.000779088	0.00476958	yes	up
TRINITY_DN10186_c0_g1	hypothetical protein CHLNCDRAFT_51806 [Chlorella variabilis]	2.9718	1.57134	0.00016106	0.00125627	yes	up
TRINITY_DN4407_c0_g1	hypothetical protein CHLNCDRAFT_49649 [Chlorella variabilis]	4.8726	2.28469	2.62517e-30	8.78206e-28	yes	up
TRINITY_DN11776_c0_g1	hypothetical protein CHLNCDRAFT_145144 [Chlorella variabilis]	5.87838	2.55542	1.82764e-18	1.9513e-16	yes	up
TRINITY_DN1465_c0_g5	hypothetical protein CHLNCDRAFT_140870 [Chlorella variabilis]	2.17147	1.11867	0.0458555	0.127859	yes	up
TRINITY_DN16744_c0_g1	hypothetical protein CHLNCDRAFT_137777 [Chlorella variabilis]	46.5166	5.53967	7.59654e-17	6.54572e-15	yes	up
TRINITY_DN4418_c0_g1	hypothetical protein CHLNCDRAFT_137777 [Chlorella variabilis]	2.45021	1.2929	1.88315e-08	4.3149e-07	yes	up
TRINITY_DN8339_c0_g1	hypothetical protein CHLNCDRAFT_137154 [Chlorella variabilis]	3.05573	1.61152	0.00347367	0.0164468	yes	up
TRINITY_DN15786_c0_g1	hypothetical protein CHLNCDRAFT_135347 [Chlorella variabilis]	2.25831	1.17525	0.000121262	0.000987812	yes	up
TRINITY_DN2733_c0_g1	hypothetical protein CHLNCDRAFT_134838 [Chlorella variabilis]	2.07166	1.05079	3.88158e-11	1.45537e-09	yes	up
TRINITY_DN1910_c0_g3	hypothetical protein CEUSTIGMA_g9649.t1 [Chlamydomonas eustigma]	3.78574	1.92058	3.46488e-07	5.92058e-06	yes	up
TRINITY_DN4476_c1_g1	hypothetical protein CEUSTIGMA_g7629.t1 [Chlamydomonas eustigma]	2.00576	1.00415	0.000211581	0.00158583	yes	up
TRINITY_DN20629_c0_g1	hypothetical protein CEUSTIGMA_g7500.t1 [Chlamydomonas eustigma]	2.02992	1.02143	0.000950822	0.00563198	yes	up
TRINITY_DN5545_c0_g1	hypothetical protein CEUSTIGMA_g7480.t1 [Chlamydomonas eustigma]	2.26209	1.17766	0.00265552	0.0131681	yes	up
TRINITY_DN13214_c0_g5	hypothetical protein CEUSTIGMA_g7457.t1 [Chlamydomonas eustigma]	2.57405	1.36404	5.88269e-07	9.54289e-06	yes	up
TRINITY_DN25530_c0_g1	hypothetical protein CEUSTIGMA_g6853.t1 [Chlamydomonas eustigma]	2.06862	1.04867	2.52357e-07	4.47993e-06	yes	up
TRINITY_DN4175_c0_g2	hypothetical protein CEUSTIGMA_g4800.t1 [Chlamydomonas eustigma]	2.51516	1.33065	3.28814e-18	3.33331e-16	yes	up
TRINITY_DN25232_c0_g1	hypothetical protein CEUSTIGMA_g4540.t1 [Chlamydomonas eustigma]	2.54709	1.34885	0.000931241	0.00553997	yes	up
TRINITY_DN7585_c0_g3	hypothetical protein CEUSTIGMA_g4225.t1 [Chlamydomonas eustigma]	2.99563	1.58286	5.14248e-06	6.38737e-05	yes	up
TRINITY_DN6096_c0_g4	hypothetical protein CEUSTIGMA_g417.t1 [Chlamydomonas eustigma]	2.31665	1.21204	7.25795e-05	0.000635609	yes	up
TRINITY_DN15926_c0_g1	hypothetical protein CEUSTIGMA_g2990.t1 [Chlamydomonas eustigma]	2.24944	1.16956	0.00255553	0.0127725	yes	up
TRINITY_DN24066_c0_g1	hypothetical protein CEUSTIGMA_g1227.t1 [Chlamydomonas eustigma]	2.03082	1.02206	1.70767e-08	3.94586e-07	yes	up
TRINITY_DN10771_c1_g1	hypothetical protein CEUSTIGMA_g11722.t1 [Chlamydomonas eustigma]	2.55946	1.35584	3.57042e-05	0.000345084	yes	up
TRINITY_DN2715_c0_g3	hypothetical protein CEUSTIGMA_g10605.t1 [Chlamydomonas eustigma]	4.0459	2.01646	0.0152151	0.0541932	yes	up
TRINITY_DN19965_c0_g1	hypothetical protein C2E21_7580 [Chlorella sorokiniana]	3.60538	1.85015	2.03911e-13	1.09047e-11	yes	up
TRINITY_DN4113_c0_g3	hypothetical protein C2E21_7358 [Chlorella sorokiniana]	2.89438	1.53325	5.48936e-06	6.76796e-05	yes	up
TRINITY_DN26607_c0_g1	hypothetical protein C2E21_0018 [Chlorella sorokiniana]	3.80193	1.92673	3.91901e-30	1.28254e-27	yes	up
TRINITY_DN25300_c0_g1	hypothetical protein C2E20_9078 [Micractinium conductrix]	7.03177	2.81389	0.041091	0.117167	yes	up
TRINITY_DN7090_c2_g1	hypothetical protein C2E20_7752 [Micractinium conductrix]	2.1198	1.08393	3.76157e-10	1.18218e-08	yes	up
TRINITY_DN6500_c0_g1	hypothetical protein C2E20_7735 [Micractinium conductrix]	3.9545	1.98349	2.96774e-11	1.1397e-09	yes	up
TRINITY_DN3064_c0_g1	hypothetical protein C2E20_7243 [Micractinium conductrix]	2.36248	1.2403	1.16936e-17	1.11415e-15	yes	up
TRINITY_DN10116_c0_g1	hypothetical protein C2E20_5704 [Micractinium conductrix]	2.17185	1.11892	0.000425835	0.00287467	yes	up
TRINITY_DN2818_c0_g5	hypothetical protein C2E20_1756 [Micractinium conductrix]	2.89038	1.53126	0.000762619	0.00468689	yes	up
TRINITY_DN990_c1_g1	hypothetical protein [Dunaliella viridis]	2.00732	1.00527	7.54676e-13	3.71271e-11	yes	up
TRINITY_DN1713_c3_g2	hypothetical protein [Dunaliella viridis]	5.68143	2.50625	5.83776e-05	0.000526237	yes	up
TRINITY_DN5899_c0_g2	hypothetical protein [Dunaliella viridis]	4.82166	2.26953	9.64371e-05	0.000808332	yes	up
TRINITY_DN9663_c0_g1	hypothetical protein [Dunaliella viridis]	5.78824	2.53313	0.000416837	0.00282469	yes	up
TRINITY_DN12537_c0_g5	hypothetical protein [Dunaliella viridis]	6.26843	2.6481	0.0381122	0.110558	yes	up
TRINITY_DN5064_c0_g4	hypothetical protein [Dunaliella viridis]	4.63021	2.21108	0.0471831	0.130629	yes	up
TRINITY_DN8921_c0_g1	GRIP and coiled-coil domain-containing [Micractinium conductrix]	4.77208	2.25462	5.82296e-16	4.53018e-14	yes	up
TRINITY_DN22658_c0_g1	Embryo defective 2410 isoform 2 [Micractinium conductrix]	2.29382	1.19775	8.57267e-08	1.68476e-06	yes	up
TRINITY_DN19602_c0_g1	Embryo defective 2410 isoform 2 [Chlorella sorokiniana]	2.03198	1.02289	0.000405296	0.00275921	yes	up
TRINITY_DN9354_c0_g4	DUF3685 family [Chlorella sorokiniana]	3.34626	1.74255	0.000918161	0.00547514	yes	up
TRINITY_DN17270_c0_g1	DUF1772-domain-containing protein [Coccomyxa subellipsoidea C-169]	2.56728	1.36024	0.00117706	0.00675282	yes	up
TRINITY_DN800_c0_g1	CW80Cd404 protein [Chlamydomonas sp. W80]	2.00172	1.00124	1.34842e-07	2.52006e-06	yes	up
TRINITY_DN26335_c0_g1	Coiled-coil domain-containing protein 111-like protein [Auxenochlorella protothecoides]	4.74359	2.24598	2.24667e-07	4.03597e-06	yes	up
TRINITY_DN16148_c0_g2	beta-Ig-H3/Fasciclin [Ostreococcus tauri]	13.7665	3.78309	0.0331449	0.0991603	yes	up
TRINITY_DN7918_c0_g1	Amino acid permease 2 [Micractinium conductrix]	8.52022	3.09089	1.25942e-42	9.47964e-40	yes	up
TRINITY_DN3911_c1_g1	acid phosphatase [Chlorella sorokiniana]	3.21413	1.68443	1.79473e-06	2.55274e-05	yes	up
TRINITY_DN399_c0_g2	hypothetical protein CEUSTIGMA_g8836.t1, partial [Chlamydomonas eustigma]	2.12795	1.08946	0.017639	0.0608124	yes	up
TRINITY_DN22880_c0_g1	PR-1 [Micractinium conductrix]	3.60085	1.84834	2.02397e-15	1.44183e-13	yes	up
TRINITY_DN4702_c0_g1	DNA-directed RNA polymerases IV and V subunit 11 [Micractinium conductrix]	2.1734	1.11995	7.80407e-09	1.92436e-07	yes	up
TRINITY_DN8656_c0_g1	hypothetical protein CHLNCDRAFT_59722 [Chlorella variabilis]	2.05016	1.03573	9.97955e-06	0.000114812	yes	up
TRINITY_DN9737_c0_g2	hypothetical protein CEUSTIGMA_g10788.t1 [Chlamydomonas eustigma]	2.67399	1.419	7.99045e-15	5.17369e-13	yes	up
TRINITY_DN2295_c0_g1	alcohol dehydrogenase [Chlorella sorokiniana]	2.74054	1.45446	5.46772e-24	1.01619e-21	yes	up
TRINITY_DN20611_c0_g1	hypothetical protein GPECTOR_26g609 [Gonium pectorale]	2.00478	1.00345	6.50118e-06	7.8452e-05	yes	up
TRINITY_DN21631_c0_g1	hypothetical protein CEUSTIGMA_g4653.t1 [Chlamydomonas eustigma]	2.02268	1.01627	4.85644e-06	6.08987e-05	yes	up
TRINITY_DN7170_c3_g1	hypothetical protein C2E20_3905 [Micractinium conductrix]	13.098	3.71127	0.0361946	0.106079	yes	up
TRINITY_DN7120_c0_g1	hypothetical protein CEUSTIGMA_g424.t1 [Chlamydomonas eustigma]	3.30803	1.72597	1.33288e-09	3.79303e-08	yes	up
TRINITY_DN18846_c0_g1	hypothetical protein CHLRE_14g611484v5 [Chlamydomonas reinhardtii]	2.21029	1.14423	7.57342e-06	8.93497e-05	yes	up
TRINITY_DN2449_c1_g1	elongation factor Tu (chloroplast) [Chlorella sorokiniana]	6.264	2.64708	7.02658e-06	8.36825e-05	yes	up
TRINITY_DN4461_c0_g1	predicted protein [Chlamydomonas reinhardtii]	2.17669	1.12213	2.31572e-07	4.1427e-06	yes	up
TRINITY_DN3346_c0_g1	hypothetical protein CH29B_p069 (chloroplast) [Chlorella sp. ArM0029B]	83.4066	6.38209	1.0033e-66	1.88797e-63	yes	up
TRINITY_DN10335_c0_g1	hypothetical protein CH29B_p069 (chloroplast) [Chlorella sp. ArM0029B]	4.14909	2.0528	3.1528e-05	0.000309302	yes	up
TRINITY_DN51_c0_g1	hypothetical protein CH29B_p069 (chloroplast) [Chlorella sp. ArM0029B]	3.22619	1.68983	0.000878244	0.00527157	yes	up
TRINITY_DN2439_c0_g1	hypothetical protein BW920_0005 (chloroplast) [Auxenochlorella protothecoides]	2.97776	1.57423	4.1855e-06	5.35559e-05	yes	up
TRINITY_DN6226_c2_g1	Desiccation stress protein DSP-22, chloroplastic [Tetrabaena socialis]	2.05372	1.03824	7.66516e-06	9.02955e-05	yes	up
TRINITY_DN7755_c0_g3	hypothetical protein VOLCADRAFT_120854 [Volvox carteri f. nagariensis]	2.11691	1.08196	0.0321643	0.0969581	yes	up
TRINITY_DN20724_c0_g1	Carotene biosynthesis-related protein CBR, chloroplastic [Tetrabaena socialis]	2.17956	1.12404	1.87191e-05	0.00019834	yes	up
TRINITY_DN10617_c0_g2	2,5-didehydrogluconate reductase [Chlorella sorokiniana]	2.02367	1.01698	0.000257738	0.00187439	yes	up
TRINITY_DN537_c0_g1	hypothetical protein CEUSTIGMA_g6857.t1 [Chlamydomonas eustigma]	2.46731	1.30294	0.000340462	0.00237779	yes	up
TRINITY_DN16913_c0_g2	hypothetical chloroplast RF1 [Parachlorella kessleri]	5.93438	2.5691	0.0162233	0.0570754	yes	up
TRINITY_DN8725_c0_g3	hypothetical protein VOLCADRAFT_80651 [Volvox carteri f. nagariensis]	2.28268	1.19073	3.59619e-06	4.67505e-05	yes	up
TRINITY_DN3254_c0_g1	hypothetical protein CHLNCDRAFT_138476 [Chlorella variabilis]	2.38093	1.25152	7.58946e-15	4.92464e-13	yes	up
TRINITY_DN18142_c0_g1	mitochondrial substrate carrier protein [Chlamydomonas reinhardtii]	2.05024	1.03579	5.57019e-08	1.14164e-06	yes	up
TRINITY_DN26341_c0_g1	hypothetical protein CEUSTIGMA_g7150.t1 [Chlamydomonas eustigma]	4.05363	2.01921	2.48374e-24	4.79363e-22	yes	up
TRINITY_DN5573_c0_g3	hypothetical protein CHLRE_10g461900v5 [Chlamydomonas reinhardtii]	2.24199	1.16478	1.918e-08	4.38808e-07	yes	up
TRINITY_DN7339_c0_g1	hypothetical protein CEUSTIGMA_g330.t1 [Chlamydomonas eustigma]	2.17506	1.12105	0.0233587	0.0757604	yes	up
TRINITY_DN5255_c0_g5	hypothetical protein CEUSTIGMA_g12549.t1 [Chlamydomonas eustigma]	2.11224	1.07878	0.00079755	0.00486354	yes	up
TRINITY_DN24232_c0_g1	hypothetical protein COCSUDRAFT_62896 [Coccomyxa subellipsoidea C-169]	2.1223	1.08563	0.000294752	0.00209748	yes	up
TRINITY_DN17205_c0_g1	probable transport protein [Parachlorella kessleri]	9.17028	3.19697	0.00218757	0.0112395	yes	up
TRINITY_DN1927_c0_g1	hypothetical protein CEUSTIGMA_g10442.t1 [Chlamydomonas eustigma]	3.04187	1.60496	1.64126e-06	2.36595e-05	yes	up
TRINITY_DN2100_c2_g2	Zinc transporter ZupT, partial [Tetrabaena socialis]	2.77485	1.47241	0.0171967	0.059581	yes	up
TRINITY_DN8873_c0_g1	zinc transporter [Micractinium conductrix]	2.16654	1.1154	4.21806e-05	0.000399111	yes	up
TRINITY_DN18172_c0_g1	hypothetical protein COCSUDRAFT_31546 [Coccomyxa subellipsoidea C-169]	2.03612	1.02582	9.1506e-07	1.4078e-05	yes	up
TRINITY_DN4076_c0_g2	chloroplast lycopene epsilon-cyclase precursor [Haematococcus lacustris]	3.7587	1.91024	4.44088e-12	1.94058e-10	yes	up
TRINITY_DN18898_c0_g1	chloroplast lycopene epsilon-cyclase precursor [Auxenochlorella protothecoides]	2.23575	1.16076	3.38706e-05	0.000329598	yes	up
TRINITY_DN22445_c0_g1	hypothetical protein CHLRE_17g722700v5 [Chlamydomonas reinhardtii]	2.62994	1.39503	8.30485e-08	1.6364e-06	yes	up
TRINITY_DN2560_c0_g5	hypothetical protein CEUSTIGMA_g8046.t1 [Chlamydomonas eustigma]	2.35296	1.23448	0.00168417	0.00909545	yes	up
TRINITY_DN7886_c1_g1	hypothetical protein VOLCADRAFT_108157 [Volvox carteri f. nagariensis]	2.2356	1.16066	1.95265e-11	7.79712e-10	yes	up
TRINITY_DN16618_c0_g2	FACT complex subunit SPT16-like [Chlorella sorokiniana]	2.22874	1.15623	3.27571e-12	1.46546e-10	yes	up
TRINITY_DN15732_c0_g4	hypothetical protein CEUSTIGMA_g9361.t1 [Chlamydomonas eustigma]	2.74881	1.45881	0.000321224	0.0022639	yes	up
TRINITY_DN1048_c0_g4	hypothetical protein CEUSTIGMA_g2296.t1 [Chlamydomonas eustigma]	2.32652	1.21817	0.0444301	0.124774	yes	up
TRINITY_DN539_c1_g5	SEC1 family transport SLY1-like [Micractinium conductrix]	2.68919	1.42717	5.94929e-24	1.07904e-21	yes	up
TRINITY_DN3228_c0_g2	hypothetical protein CHLNCDRAFT_137743 [Chlorella variabilis]	2.20548	1.14109	8.26453e-07	1.2929e-05	yes	up
TRINITY_DN26204_c0_g1	dihydroxyacetone reductase [Dunaliella salina]	3.67221	1.87665	2.27826e-24	4.51111e-22	yes	up
TRINITY_DN1112_c0_g1	dihydroxyacetone reductase [Dunaliella salina]	2.78606	1.47822	1.26972e-20	1.72981e-18	yes	up
TRINITY_DN7160_c0_g2	hypothetical protein CEUSTIGMA_g7111.t1 [Chlamydomonas eustigma]	2.13987	1.09752	3.58037e-07	6.09026e-06	yes	up
TRINITY_DN23073_c0_g1	hypothetical protein TSOC_000024 [Tetrabaena socialis]	2.23932	1.16306	0.0344384	0.102053	yes	up
TRINITY_DN20456_c0_g1	hypothetical protein CHLRE_01g004350v5 [Chlamydomonas reinhardtii]	2.11617	1.08145	0.000257713	0.00187439	yes	up
TRINITY_DN21297_c0_g1	Charged multivesicular body protein 1 [Tetrabaena socialis]	2.0515	1.03668	2.47119e-10	7.9831e-09	yes	up
TRINITY_DN3940_c0_g1	hypothetical protein GPECTOR_16g711 [Gonium pectorale]	2.00915	1.00658	1.93105e-08	4.40789e-07	yes	up
TRINITY_DN232_c0_g1	Snf7-domain-containing protein [Coccomyxa subellipsoidea C-169]	2.14314	1.09973	4.3826e-14	2.60774e-12	yes	up
TRINITY_DN10356_c0_g1	charged multivesicular body 5-like isoform A [Micractinium conductrix]	2.18191	1.12559	4.70704e-09	1.2051e-07	yes	up
TRINITY_DN22694_c0_g1	Uroporphyrinogen-III synthase, chloroplastic, partial [Tetrabaena socialis]	2.05415	1.03854	0.00330802	0.0158092	yes	up
TRINITY_DN3708_c0_g1	hypothetical protein CEUSTIGMA_g8710.t1 [Chlamydomonas eustigma]	2.11686	1.08192	0.00059995	0.00383428	yes	up
TRINITY_DN1096_c0_g1	UDP-glucose pyrophosphorylase [Micractinium conductrix]	2.92756	1.5497	4.68646e-35	2.17077e-32	yes	up
TRINITY_DN1083_c2_g2	hypothetical protein GPECTOR_54g174 [Gonium pectorale]	2.0013	1.00094	1.38503e-05	0.000152582	yes	up
TRINITY_DN5871_c0_g1	4-hydroxyphenylpyruvate dioxygenase [Chlamydomonas reinhardtii]	20.0299	4.32408	0.0328885	0.0985879	yes	up
TRINITY_DN21070_c0_g1	hypothetical protein CEUSTIGMA_g8931.t1 [Chlamydomonas eustigma]	2.0694	1.04921	0.00165658	0.00897377	yes	up
TRINITY_DN25550_c0_g1	hypothetical protein CEUSTIGMA_g11305.t1 [Chlamydomonas eustigma]	2.10723	1.07534	3.36039e-06	4.41618e-05	yes	up
TRINITY_DN6699_c0_g1	hypothetical protein CHLNCDRAFT_142212 [Chlorella variabilis]	2.03375	1.02414	2.59836e-06	3.5176e-05	yes	up
TRINITY_DN2305_c0_g6	hypothetical protein COCSUDRAFT_40465 [Coccomyxa subellipsoidea C-169]	2.1786	1.1234	0.00322054	0.0154647	yes	up
TRINITY_DN655_c0_g1	hypothetical protein CHLNCDRAFT_52384 [Chlorella variabilis]	4.90524	2.29432	7.7129e-26	1.78631e-23	yes	up
TRINITY_DN6116_c0_g1	hypothetical protein CEUSTIGMA_g5098.t1 [Chlamydomonas eustigma]	2.19916	1.13696	1.97969e-06	2.78266e-05	yes	up
TRINITY_DN4608_c0_g1	selenocysteine lyase [Chlorella sorokiniana]	2.13509	1.0943	0.000106632	0.000882727	yes	up
TRINITY_DN13819_c0_g2	hypothetical protein CHLNCDRAFT_143159 [Chlorella variabilis]	2.47819	1.30929	0.00272396	0.0134514	yes	up
TRINITY_DN3261_c0_g2	3-dehydroquinate synthase [Micractinium conductrix]	2.01947	1.01397	3.8179e-12	1.69542e-10	yes	up
TRINITY_DN8165_c0_g5	hypothetical protein CEUSTIGMA_g12129.t1 [Chlamydomonas eustigma]	2.14111	1.09836	0.00238289	0.0120599	yes	up
TRINITY_DN6671_c0_g3	Expansin 1 [Chlorella sorokiniana]	5.02104	2.32799	1.49734e-10	5.03146e-09	yes	up
TRINITY_DN1723_c0_g1	Ribonuclease P subunit p29 [Chlorella sorokiniana]	2.02815	1.02017	4.20091e-09	1.09129e-07	yes	up
TRINITY_DN3297_c0_g1	Peptidyl-prolyl cis-trans isomerase FKBP20- chloroplastic [Chlorella sorokiniana]	2.05219	1.03717	0.00116002	0.00667035	yes	up
TRINITY_DN14535_c0_g2	tRNA-Ile lysidine synthase [Parachlorella kessleri]	7.46563	2.90026	0.000283454	0.00203293	yes	up
TRINITY_DN6194_c1_g5	hypothetical protein CHLNCDRAFT_137887 [Chlorella variabilis]	3.38136	1.7576	6.831e-20	8.71474e-18	yes	up
TRINITY_DN5555_c0_g1	hypothetical protein CEUSTIGMA_g3046.t1 [Chlamydomonas eustigma]	2.35916	1.23827	2.86927e-06	3.84289e-05	yes	up
TRINITY_DN8119_c0_g1	hypothetical protein CEUSTIGMA_g4976.t1 [Chlamydomonas eustigma]	3.24284	1.69726	2.17294e-11	8.56321e-10	yes	up
TRINITY_DN8123_c0_g8	hypothetical protein GPECTOR_59g670 [Gonium pectorale]	2.99083	1.58055	3.35417e-05	0.000326714	yes	up
TRINITY_DN8123_c0_g4	hypothetical protein GPECTOR_59g670 [Gonium pectorale]	5.27864	2.40017	0.00686146	0.0286446	yes	up
TRINITY_DN18702_c0_g1	hypothetical protein GPECTOR_2g941 [Gonium pectorale]	2.09718	1.06845	6.1396e-13	3.04532e-11	yes	up
TRINITY_DN12821_c0_g1	2-oxoglutarate dehydrogenase, mitochondrial [Auxenochlorella protothecoides]	46.3802	5.53544	0.000880783	0.00528364	yes	up
TRINITY_DN2358_c0_g1	protein kinase [Helicosporidium sp. ATCC 50920]	3.33357	1.73707	2.69707e-14	1.63716e-12	yes	up
TRINITY_DN3624_c0_g2	hypothetical protein CEUSTIGMA_g5591.t1 [Chlamydomonas eustigma]	2.11245	1.07892	4.6871e-05	0.000436497	yes	up
TRINITY_DN3452_c0_g1	organic cation carnitine transporter 7-like isoform B [Chlorella sorokiniana]	2.2488	1.16915	9.06144e-08	1.76927e-06	yes	up
TRINITY_DN10775_c0_g1	hypothetical protein GPECTOR_23g122 [Gonium pectorale]	2.48257	1.31183	6.26145e-12	2.67404e-10	yes	up
TRINITY_DN4214_c0_g2	MFS general substrate transporter [Chlorella sorokiniana]	6.4965	2.69966	1.08823e-70	2.52034e-67	yes	up
TRINITY_DN14656_c0_g1	hypothetical protein VOLCADRAFT_59957 [Volvox carteri f. nagariensis]	2.08727	1.06162	9.95043e-07	1.51536e-05	yes	up
TRINITY_DN3377_c0_g1	coiled-coil domain-containing 94-like protein isoform B [Micractinium conductrix]	3.46454	1.79266	9.08052e-25	1.87258e-22	yes	up
TRINITY_DN998_c0_g1	hypothetical protein CHLRE_17g717050v5 [Chlamydomonas reinhardtii]	2.15102	1.10502	9.43333e-10	2.77091e-08	yes	up
TRINITY_DN18948_c0_g1	hypothetical protein CEUSTIGMA_g3961.t1 [Chlamydomonas eustigma]	5.67211	2.50389	1.48756e-40	9.52926e-38	yes	up
TRINITY_DN16571_c0_g3	hypothetical protein APUTEX25_004366 [Auxenochlorella protothecoides]	7.88176	2.97852	0.0267651	0.0841086	yes	up
TRINITY_DN10849_c0_g1	ABC transporter [Volvox carteri f. nagariensis]	2.52436	1.33592	4.83162e-05	0.000447464	yes	up
TRINITY_DN378_c0_g1	major facilitator transporter [Chlorella sorokiniana]	8.4226	3.07427	2.70574e-56	3.87926e-53	yes	up
TRINITY_DN26858_c0_g1	major facilitator superfamily isoform B [Micractinium conductrix]	2.46725	1.30291	3.8864e-05	0.000371938	yes	up
TRINITY_DN9994_c0_g2	major facilitator superfamily isoform B [Micractinium conductrix]	2.01726	1.0124	0.0229586	0.074688	yes	up
TRINITY_DN2590_c1_g1	hypothetical protein CHLNCDRAFT_59527 [Chlorella variabilis]	2.05355	1.03812	5.07053e-15	3.35524e-13	yes	up
TRINITY_DN23414_c0_g1	CWF19 2 [Chlorella sorokiniana]	2.72867	1.4482	5.38958e-09	1.36476e-07	yes	up
TRINITY_DN26183_c0_g1	Amidohydrolase 2 [Ostreococcus tauri]	48.2482	5.5924	6.07965e-05	0.000545105	yes	up
TRINITY_DN2262_c0_g1	hypothetical protein CHLNCDRAFT_137099 [Chlorella variabilis]	9.55467	3.25621	1.59737e-14	9.9162e-13	yes	up
TRINITY_DN6585_c0_g1	Mechanosensitive ion channel protein 10 [Auxenochlorella protothecoides]	2.417	1.27321	3.79179e-06	4.8976e-05	yes	up
TRINITY_DN6568_c0_g1	Mechanosensitive ion channel 10 [Chlorella sorokiniana]	2.33922	1.22603	2.23521e-11	8.78561e-10	yes	up
TRINITY_DN1715_c0_g1	ABC transporter E family member 2 [Micractinium conductrix]	2.17362	1.1201	1.15931e-08	2.76142e-07	yes	up
TRINITY_DN2429_c0_g2	expressed protein [Chlorella variabilis]	2.485	1.31325	2.34466e-11	9.17986e-10	yes	up
TRINITY_DN1301_c1_g2	30S ribosomal protein S4 (mitochondrion) [Micractinium sp. LBA 32]	2.68992	1.42756	0.0174472	0.0602753	yes	up
TRINITY_DN17299_c0_g1	ribosomal protein S2 [Chlorokybus atmophyticus]	24.6659	4.62445	0.00308096	0.0149182	yes	up
TRINITY_DN17343_c0_g2	ribosomal protein S3 (chloroplast) [Cymbomonas tetramitiformis]	92.863	6.53703	3.52635e-06	4.60214e-05	yes	up
TRINITY_DN9272_c0_g1	37S ribosomal mitochondrial [Micractinium conductrix]	3.51929	1.81528	0.000563139	0.00363763	yes	up
TRINITY_DN19979_c0_g1	predicted protein [Micromonas pusilla CCMP1545]	26.7664	4.74235	0.0117218	0.0441703	yes	up
TRINITY_DN767_c2_g2	RNA-binding 45 isoform X1 [Chlorella sorokiniana]	2.25246	1.1715	8.18173e-08	1.61607e-06	yes	up
TRINITY_DN19387_c0_g1	hypothetical protein H632_c2229p0 [Helicosporidium sp. ATCC 50920]	19.4077	4.27855	0.0363355	1	yes	up
TRINITY_DN10704_c1_g1	50S ribosomal protein L27 [Bathycoccus prasinos]	12.8079	3.67896	0.00396031	0.0182515	yes	up
TRINITY_DN3035_c0_g2	expressed protein, partial [Chlorella variabilis]	4.94309	2.30541	2.19177e-22	3.5101e-20	yes	up
TRINITY_DN16892_c0_g2	hypothetical protein CBR_g50385 [Chara braunii]	9.12918	3.19048	0.00292681	0.0142936	yes	up
TRINITY_DN13471_c0_g1	ribosomal protein L36 (chloroplast) [Phacotus lenticularis]	20.896	4.38516	0.0310613	0.0942449	yes	up
TRINITY_DN8409_c0_g3	ribosomal protein L12 (chloroplast) [Nephroselmis olivacea]	10.3939	3.37767	0.00204147	0.0106635	yes	up
TRINITY_DN5354_c0_g3	30S ribosomal protein S19 (mitochondrion) [Chlorella sorokiniana]	6.78189	2.76169	0.015035	0.0536853	yes	up
TRINITY_DN5132_c0_g2	30S ribosomal protein S7 (mitochondrion) [Chlorella sp. ArM0029B]	3.39419	1.76307	9.70318e-06	0.000111975	yes	up
TRINITY_DN5132_c1_g3	30S ribosomal protein S3 (mitochondrion) [Chlorella variabilis]	2.63979	1.40042	0.000633022	0.00400918	yes	up
TRINITY_DN16892_c0_g1	ribosomal protein S8 [Chlorokybus atmophyticus]	60.9278	5.92903	0.000110707	0.000912945	yes	up
TRINITY_DN9705_c0_g1	ribosomal protein S9 [Parachlorella kessleri]	3.83281	1.9384	1.91338e-05	0.000201991	yes	up
TRINITY_DN8538_c0_g4	ribosomal protein L3 [Coccomyxa subellipsoidea C-169]	54.1573	5.75908	0.00021883	0.00163285	yes	up
TRINITY_DN5435_c0_g4	ribosomal protein S12 (chloroplast) [Protosiphon botryoides]	126.035	6.97768	4.2325e-07	7.06778e-06	yes	up
TRINITY_DN17959_c0_g1	ribosomal protein S2 (chloroplast) [Dicloster acuatus]	7.53028	2.9127	0.00119324	0.00682747	yes	up
TRINITY_DN2521_c0_g1	rps7 gene product (chloroplast) [Dunaliella salina]	2.51837	1.33249	0.00589525	0.0253238	yes	up
TRINITY_DN4854_c0_g4	rps4 gene product (chloroplast) [Dunaliella salina]	4.766	2.25278	2.18876e-15	1.54331e-13	yes	up
TRINITY_DN10469_c0_g1	ribosomal protein S4 [Parachlorella kessleri]	4.35246	2.12183	0.00603694	0.0258182	yes	up
TRINITY_DN1232_c0_g2	ribosomal protein S14 [Parachlorella kessleri]	22.2122	4.47328	0.00567195	0.0245079	yes	up
TRINITY_DN8220_c0_g1	ribosomal protein S11 [Parachlorella kessleri]	20.2744	4.34159	0.00101698	0.00595359	yes	up
TRINITY_DN16591_c0_g2	ribosomal protein L5 (plastid) [Scherffelia dubia]	8.89196	3.1525	0.00780917	0.031833	yes	up
TRINITY_DN15450_c0_g2	ribosomal protein L16 (chloroplast) [Tetraselmis sp. CCMP 881]	47.7733	5.57813	0.000551839	0.00357769	yes	up
TRINITY_DN8220_c0_g2	ribosomal protein S8 (chloroplast) [Dicloster acuatus]	12.8065	3.6788	0.0104094	0.0401133	yes	up
TRINITY_DN6459_c0_g2	ribosomal protein L32 [Parachlorella kessleri]	3.04443	1.60617	0.0102699	0.0396926	yes	up
TRINITY_DN13780_c0_g4	rpl2 gene product (chloroplast) [Dunaliella salina]	3.51129	1.812	0.00111309	0.00643985	yes	up
TRINITY_DN8538_c0_g5	ribosomal protein L2 (chloroplast) [Pseudoneochloris marina]	26.99	4.75435	0.0110725	0.0421563	yes	up
TRINITY_DN3467_c2_g1	hypothetical protein CEUSTIGMA_g5109.t1 [Chlamydomonas eustigma]	2.32255	1.21571	8.47835e-16	6.44611e-14	yes	up
TRINITY_DN2449_c0_g3	30S ribosomal protein S12 (mitochondrion) [Micractinium sp. LBA 32]	2.418	1.27381	0.0093443	0.036753	yes	up
TRINITY_DN19273_c0_g1	hypothetical protein APUTEX25_003683 [Auxenochlorella protothecoides]	2.38465	1.25378	1.29711e-05	0.000144482	yes	up
TRINITY_DN11326_c0_g1	ribosomal protein L17 [Coccomyxa subellipsoidea C-169]	86.5385	6.43527	2.054e-05	0.000214356	yes	up
TRINITY_DN3216_c0_g7	ribosomal protein L2 [Parachlorella kessleri]	3.35443	1.74607	0.0297143	0.0909834	yes	up
TRINITY_DN9303_c0_g4	subtilisin-like protease isoform A [Chlorella sorokiniana]	2.16749	1.11603	7.30527e-12	3.08481e-10	yes	up
TRINITY_DN268_c0_g1	hypothetical protein APUTEX25_003121 [Auxenochlorella protothecoides]	2.01519	1.01091	1.34828e-10	4.5714e-09	yes	up
TRINITY_DN4885_c0_g1	hypothetical protein CHLNCDRAFT_56892 [Chlorella variabilis]	2.15424	1.10718	6.86882e-15	4.50559e-13	yes	up
TRINITY_DN22942_c0_g1	signal peptide peptidase [Chlorella sorokiniana]	2.49274	1.31773	3.91737e-09	1.02028e-07	yes	up
TRINITY_DN349_c0_g1	hypothetical protein GPECTOR_161g124 [Gonium pectorale]	4.09674	2.03448	0.00499871	0.0220968	yes	up
TRINITY_DN8538_c0_g6	predicted protein [Micromonas commoda]	43.0463	5.42782	0.000264586	0.00191863	yes	up
TRINITY_DN8538_c0_g1	hypothetical protein CHLNCDRAFT_31437 [Chlorella variabilis]	70.8305	6.1463	4.04244e-05	0.000384792	yes	up
TRINITY_DN11545_c0_g1	DNA-directed RNA polymerase III subunit RPC5 isoform A [Chlorella sorokiniana]	2.069	1.04893	0.000323797	0.00227991	yes	up
TRINITY_DN4854_c0_g3	ribosomal protein L20 (plastid) [Dunaliella tertiolecta]	2.30167	1.20268	0.0140176	0.0508118	yes	up
TRINITY_DN10790_c0_g1	mitochondrial ribosomal protein L11 [Chlamydomonas reinhardtii]	2.03061	1.02192	2.19463e-06	3.04358e-05	yes	up
TRINITY_DN17116_c0_g1	photosystem I assembly protein Ycf4 [Parachlorella kessleri]	5.66916	2.50314	4.10078e-05	0.000389606	yes	up
TRINITY_DN139_c0_g1	cytosolic phosphoglucose isomerase isoform A [Chlorella sorokiniana]	2.54043	1.34507	7.19533e-20	9.10239e-18	yes	up
TRINITY_DN3502_c0_g6	beta subunit of RNA polymerase [Parachlorella kessleri]	6.63222	2.72949	2.53448e-05	0.00025624	yes	up
TRINITY_DN9442_c0_g2	RNA polymerase beta'' subunit [Mesostigma viride]	31.4708	4.97594	0.00682446	0.0285218	yes	up
TRINITY_DN9807_c0_g2	rpoBb gene product (chloroplast) [Dunaliella salina]	2.46509	1.30164	8.80712e-05	0.000749688	yes	up
TRINITY_DN12528_c1_g2	beta subunit of RNA polymerase (chloroplast) [Nephroselmis astigmatica]	16.463	4.04115	0.000372796	0.0025659	yes	up
TRINITY_DN9807_c0_g1	beta subunit of RNA polymerase (chloroplast) [Dunaliella salina]	2.22412	1.15324	2.58741e-06	3.50435e-05	yes	up
TRINITY_DN8374_c0_g1	alpha subunit of RNA polymerase [Parachlorella kessleri]	19.1171	4.25679	0.00150081	0.00825325	yes	up
TRINITY_DN23143_c0_g1	alpha subunit of RNA polymerase [Chlorokybus atmophyticus]	43.1786	5.43224	0.000965915	0.00570873	yes	up
TRINITY_DN16166_c0_g1	beta subunit of RNA polymerase [Chlorokybus atmophyticus]	58.203	5.86302	0.000126132	0.00102113	yes	up
TRINITY_DN12528_c1_g5	beta subunit of RNA polymerase [Chlorokybus atmophyticus]	44.6043	5.47911	0.00015878	0.00124137	yes	up
TRINITY_DN16981_c0_g1	beta' subunit of RNA polymerase (chloroplast) [Pyramimonas parkeae]	19.6086	4.29342	0.0364681	1	yes	up
TRINITY_DN11949_c0_g3	rpoC1 gene product (chloroplast) [Dunaliella salina]	2.94787	1.55967	0.00822103	0.0331839	yes	up
TRINITY_DN9526_c0_g4	beta'' subunit of RNA polymerase [Parachlorella kessleri]	5.13249	2.35966	8.18538e-11	2.8824e-09	yes	up
TRINITY_DN9526_c0_g5	beta'' subunit of RNA polymerase [Parachlorella kessleri]	4.71248	2.23649	0.00284175	0.0139438	yes	up
TRINITY_DN5623_c0_g4	beta' subunit of RNA polymerase (chloroplast) [Dunaliella salina]	3.43643	1.78091	0.000359901	0.00248929	yes	up
TRINITY_DN9137_c0_g1	set domain [Micractinium conductrix]	2.48416	1.31276	1.23234e-07	2.32769e-06	yes	up
TRINITY_DN18170_c0_g1	hypothetical protein CEUSTIGMA_g11420.t1 [Chlamydomonas eustigma]	2.62152	1.3904	4.12589e-08	8.73839e-07	yes	up
TRINITY_DN23273_c0_g1	oxygen-evolving enhancer protein 2 [Volvox carteri f. nagariensis]	3.49972	1.80724	6.13603e-27	1.6349e-24	yes	up
TRINITY_DN22475_c0_g1	hypothetical protein GPECTOR_1g90 [Gonium pectorale]	2.66672	1.41507	4.88772e-10	1.51399e-08	yes	up
TRINITY_DN1924_c3_g1	hypothetical protein VOLCADRAFT_120148 [Volvox carteri f. nagariensis]	2.32005	1.21416	3.23889e-12	1.45114e-10	yes	up
TRINITY_DN25956_c0_g1	hypothetical protein Rsub_07170 [Raphidocelis subcapitata]	2.07176	1.05086	2.60312e-06	3.52088e-05	yes	up
TRINITY_DN4233_c0_g2	Alternative oxidase, mitochondrial [Tetrabaena socialis]	2.22087	1.15112	1.10663e-08	2.65275e-07	yes	up
TRINITY_DN7248_c0_g1	hydroxyethylthiazole kinase [Chlamydomonas reinhardtii]	2.68395	1.42436	3.78451e-06	4.89031e-05	yes	up
TRINITY_DN3612_c0_g3	hypothetical protein TSOC_006612, partial [Tetrabaena socialis]	2.35058	1.23302	7.71339e-05	0.000670944	yes	up
TRINITY_DN4966_c0_g1	serine hydroxymethyltransferase [Chlorella sorokiniana]	2.3844	1.25363	5.87217e-08	1.19945e-06	yes	up
TRINITY_DN3810_c0_g4	molecular chaperone [Volvox carteri f. nagariensis]	6.70828	2.74594	0.0296931	0.0909552	yes	up
TRINITY_DN4758_c0_g1	transcription factor S [Chlorella sorokiniana]	2.31847	1.21318	1.10903e-19	1.37978e-17	yes	up
TRINITY_DN2077_c0_g3	hypothetical protein CEUSTIGMA_g8703.t1 [Chlamydomonas eustigma]	2.05243	1.03733	0.000631396	0.00400212	yes	up
TRINITY_DN17841_c1_g1	serine threonine-kinase ATM isoform X1 [Micractinium conductrix]	4.5485	2.18539	0.00499751	0.0220947	yes	up
TRINITY_DN8099_c0_g12	serine threonine- kinase ATM isoform X2 [Chlorella sorokiniana]	2.67299	1.41845	1.61703e-08	3.7566e-07	yes	up
TRINITY_DN8099_c0_g4	serine threonine- kinase ATM isoform X2 [Chlorella sorokiniana]	2.26995	1.18266	0.000253689	0.00185075	yes	up
TRINITY_DN14823_c0_g1	serine threonine- kinase ATM isoform X2 [Chlorella sorokiniana]	2.78861	1.47955	0.00162612	0.00883902	yes	up
TRINITY_DN21684_c0_g1	serine threonine- kinase ATM isoform X2 [Chlorella sorokiniana]	2.78186	1.47605	0.0241533	0.0777513	yes	up
TRINITY_DN840_c0_g1	hypothetical protein APUTEX25_004930 [Auxenochlorella protothecoides]	4.80912	2.26577	1.4138e-45	1.37312e-42	yes	up
TRINITY_DN5992_c0_g1	serine threonine-kinase ATM isoform X1 [Micractinium conductrix]	4.42568	2.1459	5.23763e-05	0.000479616	yes	up
TRINITY_DN17841_c1_g2	serine threonine- kinase ATM isoform X2 [Chlorella sorokiniana]	3.12421	1.64349	6.69616e-05	0.000592964	yes	up
TRINITY_DN4453_c0_g1	hypothetical protein CEUSTIGMA_g1584.t1 [Chlamydomonas eustigma]	3.85549	1.94691	2.38149e-19	2.83407e-17	yes	up
TRINITY_DN4152_c0_g1	hypothetical protein MNEG_4690 [Monoraphidium neglectum]	2.05392	1.03838	4.01291e-07	6.74599e-06	yes	up
TRINITY_DN7075_c0_g6	hypothetical protein GPECTOR_45g177 [Gonium pectorale]	2.09897	1.06968	0.0024982	0.0125339	yes	up
TRINITY_DN26059_c0_g1	putative 3-beta-hydroxysteroid-Delta(8),Delta(7)-isomerase [Chlorella sorokiniana]	2.48168	1.31132	4.69862e-06	5.91909e-05	yes	up
TRINITY_DN2930_c1_g1	hypothetical protein CHLNCDRAFT_56217 [Chlorella variabilis]	2.24553	1.16706	9.11341e-09	2.22536e-07	yes	up
TRINITY_DN17158_c0_g1	hypothetical protein CHLNCDRAFT_50614 [Chlorella variabilis]	3.00754	1.58859	0.0016696	0.00902971	yes	up
TRINITY_DN11171_c0_g1	24-methylenesterol C-methyltransferase 2 [Chlorella sorokiniana]	2.03439	1.0246	4.41369e-08	9.26691e-07	yes	up
TRINITY_DN3695_c0_g1	sterol desaturase [Chlorella sorokiniana]	2.84519	1.50853	1.84466e-16	1.51746e-14	yes	up
TRINITY_DN4340_c2_g1	hypothetical protein GPECTOR_10g803 [Gonium pectorale]	2.7749	1.47243	0.00384466	0.0178331	yes	up
TRINITY_DN846_c0_g1	hypothetical protein CEUSTIGMA_g8569.t1 [Chlamydomonas eustigma]	2.05965	1.0424	3.10485e-07	5.38915e-06	yes	up
TRINITY_DN5887_c0_g1	hypothetical protein CHLNCDRAFT_136293 [Chlorella variabilis]	2.44331	1.28884	0.0308716	0.0938207	yes	up
TRINITY_DN5612_c0_g1	sterol-4alpha-carboxylate 3-dehydrogenase (decarboxylating) [Klebsormidium nitens]	2.41432	1.27161	5.79347e-06	7.09641e-05	yes	up
TRINITY_DN2314_c0_g2	PLANT CADMIUM RESISTANCE 2-like [Chlorella sorokiniana]	2.03382	1.02419	0.00240585	0.0121512	yes	up
TRINITY_DN517_c0_g1	4-alpha-glucanotransferase chloroplastic amyloplastic [Micractinium conductrix]	5.24366	2.39057	1.26802e-48	1.41398e-45	yes	up
TRINITY_DN21460_c0_g1	granule-bound starch synthase [Raphidocelis subcapitata]	2.18092	1.12494	0.00720968	0.0298418	yes	up
TRINITY_DN4249_c0_g2	granule-bound starch synthase [Parachlorella kessleri]	2.23546	1.16057	5.70459e-17	5.05159e-15	yes	up
TRINITY_DN12799_c0_g1	granule-bound starch [Micractinium conductrix]	2.42583	1.27848	7.75505e-06	9.1171e-05	yes	up
TRINITY_DN6912_c1_g3	hypothetical protein Rsub_09584 [Raphidocelis subcapitata]	2.05731	1.04076	0.0184679	0.0629921	yes	up
TRINITY_DN14937_c0_g1	DNA mismatch repair protein, MSH6 [Raphidocelis subcapitata]	2.24728	1.16818	0.0398165	0.114345	yes	up
TRINITY_DN8658_c0_g4	trafficking particle complex II-specific subunit 130-like protein [Micractinium conductrix]	2.0566	1.04026	0.00930734	0.0366499	yes	up
TRINITY_DN16008_c0_g3	hypothetical protein CHLRE_13g578900v5 [Chlamydomonas reinhardtii]	4.1442	2.05109	2.54131e-09	6.82548e-08	yes	up
TRINITY_DN4265_c0_g6	hypothetical protein CEUSTIGMA_g6696.t1 [Chlamydomonas eustigma]	2.36867	1.24408	0.0117479	0.0442161	yes	up
TRINITY_DN24474_c0_g1	flagellar associated protein [Raphidocelis subcapitata]	2.05838	1.04151	6.84206e-05	0.000604285	yes	up
TRINITY_DN9575_c2_g2	hypothetical protein CHLNCDRAFT_143875 [Chlorella variabilis]	2.88224	1.52719	3.84737e-12	1.70599e-10	yes	up
TRINITY_DN3379_c0_g2	hypothetical protein CHLNCDRAFT_138247 [Chlorella variabilis]	3.31699	1.72987	4.6453e-29	1.44186e-26	yes	up
TRINITY_DN17415_c1_g1	hypothetical protein GPECTOR_202g372 [Gonium pectorale]	2.96439	1.56774	0.000179572	0.00137536	yes	up
TRINITY_DN3107_c0_g7	3'5'-cyclic nucleotide phosphodiesterase [Volvox carteri f. nagariensis]	2.14549	1.10131	0.00523159	0.0229333	yes	up
TRINITY_DN2600_c0_g3	hypothetical protein CEUSTIGMA_g2634.t1 [Chlamydomonas eustigma]	2.19244	1.13253	3.40839e-08	7.36682e-07	yes	up
TRINITY_DN10678_c1_g2	guanylate cyclase, partial [Chlamydomonas reinhardtii]	2.20438	1.14037	2.97284e-07	5.17976e-06	yes	up
TRINITY_DN6213_c0_g6	hypothetical protein CEUSTIGMA_g9682.t1 [Chlamydomonas eustigma]	2.16105	1.11173	4.0724e-07	6.82315e-06	yes	up
TRINITY_DN5361_c0_g1	hypothetical protein CHLNCDRAFT_137684 [Chlorella variabilis]	3.69256	1.88462	1.74763e-10	5.80769e-09	yes	up
TRINITY_DN15308_c0_g1	ion channel [Chlorella sorokiniana]	2.02875	1.02059	0.0237574	0.0767312	yes	up
TRINITY_DN6923_c1_g3	hypothetical protein CEUSTIGMA_g3762.t1 [Chlamydomonas eustigma]	2.22149	1.15153	0.00097947	0.0057778	yes	up
TRINITY_DN2683_c0_g2	serine--tRNA ligase [Chlorella sorokiniana]	2.08264	1.05841	0.0223883	0.0732522	yes	up
TRINITY_DN14491_c0_g3	water dikinase [Raphidocelis subcapitata]	2.14409	1.10036	4.23219e-06	5.40614e-05	yes	up
TRINITY_DN24257_c0_g1	hypothetical protein CEUSTIGMA_g8945.t1 [Chlamydomonas eustigma]	2.05398	1.03842	3.70076e-12	1.64583e-10	yes	up
TRINITY_DN13430_c1_g1	arginine N-methyltransferase 2 [Chlorella sorokiniana]	3.21759	1.68598	0.0159315	0.0563053	yes	up
TRINITY_DN704_c1_g1	hypothetical protein CEUSTIGMA_g8437.t1 [Chlamydomonas eustigma]	2.08268	1.05844	3.02049e-09	8.01947e-08	yes	up
TRINITY_DN10848_c0_g1	hypothetical protein GPECTOR_29g127 [Gonium pectorale]	2.13725	1.09576	1.69022e-05	0.000182007	yes	up
TRINITY_DN15159_c0_g1	peptide deformylase [Chlorella sorokiniana]	2.44587	1.29035	0.00803137	0.0325712	yes	up
TRINITY_DN4077_c1_g1	ACD [Dunaliella tertiolecta]	2.7719	1.47087	1.2293e-10	4.20589e-09	yes	up
TRINITY_DN13987_c0_g3	hypothetical protein VOLCADRAFT_103273 [Volvox carteri f. nagariensis]	2.07372	1.05222	0.00379738	0.0176629	yes	up
TRINITY_DN22486_c0_g1	hypothetical protein C2E21_6370 [Chlorella sorokiniana]	2.25214	1.1713	2.4377e-10	7.89185e-09	yes	up
TRINITY_DN9283_c0_g1	chloroplast iron superoxide dismutase [Dunaliella salina]	2.09872	1.06951	9.37087e-15	6.0415e-13	yes	up
TRINITY_DN10376_c0_g2	ribonuclease III [Chlorella sorokiniana]	2.0637	1.04524	2.48459e-08	5.53299e-07	yes	up
TRINITY_DN7191_c0_g1	hypothetical protein CHLRE_10g446650v5 [Chlamydomonas reinhardtii]	2.55543	1.35357	0.00278052	0.0136795	yes	up
TRINITY_DN5974_c0_g1	ribonuclease H2 subunit C isoform A [Micractinium conductrix]	2.35515	1.23582	2.31068e-06	3.17526e-05	yes	up
TRINITY_DN11992_c0_g1	hypothetical protein CEUSTIGMA_g9156.t1 [Chlamydomonas eustigma]	2.37983	1.25086	0.00120941	0.00690163	yes	up
TRINITY_DN6750_c0_g1	hypothetical protein CH29B_m038 (mitochondrion) [Chlorella sp. ArM0029B]	8.54225	3.09462	0.000669444	0.00420259	yes	up
TRINITY_DN19391_c0_g1	TatA-like sec-independent protein translocator subunit [Chlamydomonas reinhardtii]	2.03139	1.02247	2.74688e-08	6.06328e-07	yes	up
TRINITY_DN25971_c0_g1	hypothetical protein CEUSTIGMA_g1747.t1 [Chlamydomonas eustigma]	2.01839	1.0132	0.000647129	0.00408208	yes	up
TRINITY_DN23314_c0_g1	50S ribosomal protein L22 [Tetrabaena socialis]	2.20713	1.14217	0.000170182	0.00131516	yes	up
TRINITY_DN379_c0_g3	hypothetical protein Rsub_12342 [Raphidocelis subcapitata]	2.31896	1.21348	1.17587e-07	2.23453e-06	yes	up
TRINITY_DN19617_c0_g1	hypothetical protein CHLRE_17g728950v5 [Chlamydomonas reinhardtii]	2.85903	1.51552	0.0263626	0.0831474	yes	up
TRINITY_DN8123_c0_g1	predicted protein, partial [Micromonas pusilla CCMP1545]	8.33003	3.05832	0.0207295	0.0689411	yes	up
TRINITY_DN116_c0_g1	RER1A-like [Micractinium conductrix]	2.11195	1.07857	4.14241e-17	3.73412e-15	yes	up
TRINITY_DN8618_c1_g3	hypothetical protein CEUSTIGMA_g10090.t1 [Chlamydomonas eustigma]	2.14114	1.09838	0.000289571	0.00206891	yes	up
TRINITY_DN1352_c0_g1	molecular chaperone [Chlorella sorokiniana]	4.993	2.31546	1.28286e-40	8.39662e-38	yes	up
TRINITY_DN3810_c0_g2	molecular chaperone [Chlorella sorokiniana]	2.13037	1.0911	3.49504e-06	4.57317e-05	yes	up
TRINITY_DN315_c2_g2	heat shock protein 70B [Chlorella variabilis]	7.21	2.85192	0.00087873	0.00527343	yes	up
TRINITY_DN12018_c0_g1	hypothetical protein VOLCADRAFT_105827 [Volvox carteri f. nagariensis]	2.55604	1.35391	3.8482e-06	4.96408e-05	yes	up
TRINITY_DN5975_c0_g1	glutathione peroxidase [Chlamydomonas reinhardtii]	2.03633	1.02597	1.51951e-06	2.20904e-05	yes	up
TRINITY_DN11193_c1_g5	hypothetical protein CEUSTIGMA_g12429.t1 [Chlamydomonas eustigma]	3.18403	1.67085	0.00422483	0.0192379	yes	up
TRINITY_DN15679_c0_g1	Cytochrome b6-f complex iron-sulfur chloroplastic [Chlorella sorokiniana]	3.91482	1.96895	2.48009e-08	5.52707e-07	yes	up
TRINITY_DN6442_c1_g2	hypothetical protein CEUSTIGMA_g5805.t1 [Chlamydomonas eustigma]	3.22285	1.68834	0.000284231	0.00203559	yes	up
TRINITY_DN16211_c0_g1	hypothetical protein VOLCADRAFT_120154 [Volvox carteri f. nagariensis]	3.52435	1.81736	0.00771036	0.0314856	yes	up
TRINITY_DN10918_c0_g1	peroxisomal targeting signal 1 receptor [Chlamydomonas reinhardtii]	2.07701	1.05451	2.22316e-05	0.000229386	yes	up
TRINITY_DN2558_c0_g3	hypothetical protein CHLRE_02g096000v5 [Chlamydomonas reinhardtii]	26.5048	4.72818	1.76864e-13	9.54303e-12	yes	up
TRINITY_DN8101_c0_g1	apocytochrome b6 of cytochrome b6/f complex (chloroplast) [Dicloster acuatus]	4.14328	2.05077	1.47657e-10	4.97278e-09	yes	up
TRINITY_DN4883_c0_g1	ATP-dependent helicase [Micractinium conductrix]	2.38544	1.25426	6.04678e-14	3.50783e-12	yes	up
TRINITY_DN2156_c0_g2	RWP-RK transcription factor [Parachlorella kessleri]	6.24069	2.6417	5.73782e-24	1.05984e-21	yes	up
TRINITY_DN22530_c0_g1	hypothetical protein CHLNCDRAFT_55047 [Chlorella variabilis]	2.19586	1.13479	4.66129e-06	5.87943e-05	yes	up
TRINITY_DN690_c0_g1	hypothetical protein Rsub_12982 [Raphidocelis subcapitata]	2.41655	1.27295	9.12859e-11	3.19214e-09	yes	up
TRINITY_DN6923_c1_g2	hypothetical protein CEUSTIGMA_g10620.t1 [Chlamydomonas eustigma]	2.51958	1.33318	0.00219576	0.0112776	yes	up
TRINITY_DN3315_c0_g1	EFR3-like protein B-like isoform X2 [Micractinium conductrix]	2.15842	1.10997	9.33294e-11	3.25227e-09	yes	up
TRINITY_DN23962_c0_g1	putative LOV domain-containing protein [Eremosphaera viridis]	3.89043	1.95993	1.13728e-13	6.31757e-12	yes	up
TRINITY_DN5939_c0_g2	hypothetical protein MNEG_4841 [Monoraphidium neglectum]	2.22664	1.15487	0.0499346	0.136403	yes	up
TRINITY_DN23889_c0_g1	hypothetical protein APUTEX25_000519 [Auxenochlorella protothecoides]	2.04967	1.03539	0.000634842	0.00401973	yes	up
TRINITY_DN12797_c0_g1	Histone deacetylase 8 [Micractinium conductrix]	4.31862	2.11057	2.00158e-11	7.95034e-10	yes	up
TRINITY_DN2935_c0_g2	Chromatin assembly factor 1 subunit A-A [Micractinium conductrix]	4.55347	2.18697	4.8911e-37	2.62966e-34	yes	up
TRINITY_DN26377_c0_g1	histone-lysine N-methyltransferase ATX2-like [Micractinium conductrix]	3.38891	1.76082	0.00017325	0.0013351	yes	up
TRINITY_DN3170_c1_g5	hypothetical protein VOLCADRAFT_85404 [Volvox carteri f. nagariensis]	2.83337	1.50252	2.43242e-11	9.46191e-10	yes	up
TRINITY_DN1433_c0_g4	von Willebrand factor A domain-containing protein 5A [Tetrabaena socialis]	2.17771	1.12281	0.000227894	0.00168544	yes	up
TRINITY_DN1388_c0_g2	Strawberry notch 1 [Micractinium conductrix]	2.08488	1.05997	9.59969e-05	0.000805315	yes	up
TRINITY_DN21342_c0_g1	Strawberry notch 1 [Micractinium conductrix]	2.29611	1.19919	0.00144445	0.00798706	yes	up
TRINITY_DN10058_c0_g1	hypothetical protein VOLCADRAFT_97478 [Volvox carteri f. nagariensis]	2.57348	1.36372	1.62094e-10	5.4226e-09	yes	up
TRINITY_DN11137_c0_g1	hemolysin III [Micractinium conductrix]	2.39758	1.26158	8.3138e-09	2.04336e-07	yes	up
TRINITY_DN21614_c0_g1	ATP-binding cassette sub-family G member 2 [Auxenochlorella protothecoides]	5.11202	2.35389	3.80644e-41	2.66522e-38	yes	up
TRINITY_DN12710_c0_g1	hypothetical protein APUTEX25_000218, partial [Auxenochlorella protothecoides]	5.00205	2.32252	4.08728e-34	1.73324e-31	yes	up
TRINITY_DN2158_c0_g1	Glucose-6-phosphate 1-dehydrogenase [Micractinium conductrix]	3.78718	1.92112	1.82264e-15	1.30657e-13	yes	up
TRINITY_DN11193_c1_g4	Werner syndrome-like exonuclease [Chlorella sorokiniana]	3.8896	1.95962	4.45253e-07	7.3942e-06	yes	up
TRINITY_DN3877_c0_g1	hypothetical protein CEUSTIGMA_g2748.t1 [Chlamydomonas eustigma]	2.05456	1.03883	0.0303093	0.0924104	yes	up
TRINITY_DN9827_c0_g1	Sodium-dependent phosphate transport chloroplastic [Chlorella sorokiniana]	2.21117	1.14481	2.99912e-18	3.05059e-16	yes	up
TRINITY_DN21615_c0_g1	ATP-binding cassette sub-family G member 2 [Chlorella sorokiniana]	5.34188	2.41735	1.16442e-46	1.16861e-43	yes	up
TRINITY_DN980_c0_g3	hypothetical protein CHLNCDRAFT_27382 [Chlorella variabilis]	11.5252	3.52671	5.56406e-12	2.40348e-10	yes	up
TRINITY_DN5638_c0_g1	DDT domain-containing isoform A [Chlorella sorokiniana]	2.51095	1.32823	6.82457e-19	7.61016e-17	yes	up
TRINITY_DN6410_c0_g2	hypothetical protein COCSUDRAFT_46901 [Coccomyxa subellipsoidea C-169]	3.08486	1.62521	2.38241e-05	0.000243317	yes	up
TRINITY_DN8740_c0_g1	Homeobox unc-4 isoform C [Micractinium conductrix]	2.37192	1.24605	2.66111e-08	5.89123e-07	yes	up
TRINITY_DN18767_c0_g1	Homeobox unc-4 [Chlorella sorokiniana]	2.75321	1.46111	3.53207e-08	7.6014e-07	yes	up
TRINITY_DN4250_c0_g1	hypothetical protein C2E21_2083 [Chlorella sorokiniana]	12.0164	3.58694	1.78805e-36	9.28182e-34	yes	up
TRINITY_DN2730_c0_g2	CCR4-NOT transcription complex subunit 10 [Micractinium conductrix]	2.21605	1.14799	3.03115e-15	2.04623e-13	yes	up
TRINITY_DN9664_c0_g1	strawberry notch-like [Chlorella sorokiniana]	2.60241	1.37985	0.0136616	0.0496886	yes	up
TRINITY_DN15397_c0_g2	hypothetical protein CHLNCDRAFT_137726 [Chlorella variabilis]	2.7537	1.46137	3.72143e-07	6.30173e-06	yes	up
TRINITY_DN1388_c0_g1	hypothetical protein CHLNCDRAFT_137726 [Chlorella variabilis]	2.70381	1.43499	4.73604e-09	1.21149e-07	yes	up
TRINITY_DN5097_c0_g1	Cell division cycle associated 7 (ISS) [Micractinium conductrix]	3.52233	1.81653	0.00012857	0.00103808	yes	up
TRINITY_DN14810_c0_g1	hypothetical protein CHLNCDRAFT_51729 [Chlorella variabilis]	7.17967	2.84392	2.83606e-09	7.56317e-08	yes	up
TRINITY_DN1571_c0_g2	hypothetical protein CHLNCDRAFT_51729 [Chlorella variabilis]	2.19669	1.13533	3.38823e-09	8.94066e-08	yes	up
TRINITY_DN14491_c0_g1	Cell division cycle-associated 7-like protein [Auxenochlorella protothecoides]	9.29506	3.21646	2.34386e-06	3.21645e-05	yes	up
TRINITY_DN15327_c0_g2	Cell division cycle-associated 7 [Micractinium conductrix]	6.28384	2.65165	5.46563e-19	6.14027e-17	yes	up
TRINITY_DN10050_c0_g1	hypothetical protein COCSUDRAFT_62069 [Coccomyxa subellipsoidea C-169]	2.3704	1.24513	0.00136243	0.00761885	yes	up
TRINITY_DN5969_c1_g2	hypothetical protein CHLNCDRAFT_132996 [Chlorella variabilis]	2.1336	1.09329	0.000108588	0.000897522	yes	up
TRINITY_DN1410_c0_g1	hypothetical protein CHLNCDRAFT_145376 [Chlorella variabilis]	2.30876	1.20712	2.84321e-07	4.98416e-06	yes	up
TRINITY_DN6276_c0_g1	retinoblastoma [Micractinium conductrix]	3.36025	1.74857	7.45514e-11	2.65947e-09	yes	up
TRINITY_DN26405_c0_g1	hypothetical protein GPECTOR_62g909 [Gonium pectorale]	19.3109	4.27134	0.00818366	0.0330666	yes	up
TRINITY_DN16590_c0_g1	heavy metal transporting ATPase [Chlamydomonas reinhardtii]	27.5657	4.7848	0.00877902	0.0349489	yes	up
TRINITY_DN18892_c0_g1	hypothetical protein CHLRE_01g054150v5 [Chlamydomonas reinhardtii]	2.04298	1.03067	5.23196e-11	1.91868e-09	yes	up
TRINITY_DN16006_c0_g1	ABC transporter (ISS) isoform B [Chlorella sorokiniana]	2.04272	1.03049	0.044593	0.125115	yes	up
TRINITY_DN9163_c0_g3	mitochondrial glycerol-3-phosphate dehydrogenase [Dunaliella salina]	8.67835	3.11742	9.82948e-08	1.89345e-06	yes	up
TRINITY_DN2707_c0_g3	Phosphatase chloroplastic [Micractinium conductrix]	2.72238	1.44487	1.0139e-16	8.55972e-15	yes	up
TRINITY_DN2707_c0_g1	hypothetical protein C2E21_4774 [Chlorella sorokiniana]	3.83838	1.9405	1.2724e-18	1.3731e-16	yes	up
TRINITY_DN4093_c0_g1	hypothetical protein APUTEX25_004022 [Auxenochlorella protothecoides]	2.46873	1.30377	5.89957e-12	2.52307e-10	yes	up
TRINITY_DN14022_c0_g1	E3 UFM1- ligase 1-like protein [Chlorella sorokiniana]	2.30826	1.20681	0.00293472	0.0143276	yes	up
TRINITY_DN7970_c0_g1	SET domain-containing [Micractinium conductrix]	2.10964	1.07699	0.00679068	0.0284042	yes	up
TRINITY_DN20889_c0_g1	anaphase-promoting complex subunit 8-like [Chlorella sorokiniana]	3.26584	1.70746	1.70944e-07	3.15174e-06	yes	up
TRINITY_DN3726_c0_g1	hypothetical protein CHLNCDRAFT_138046 [Chlorella variabilis]	3.97194	1.98984	4.64531e-28	1.39861e-25	yes	up
TRINITY_DN1091_c0_g2	E set domain-containing isoform B [Chlorella sorokiniana]	2.03104	1.02222	1.056e-11	4.33162e-10	yes	up
TRINITY_DN3132_c1_g1	hypothetical protein CEUSTIGMA_g4132.t1 [Chlamydomonas eustigma]	2.42049	1.2753	0.0261102	0.0825936	yes	up
TRINITY_DN3118_c0_g1	hypothetical protein MNEG_6627 [Monoraphidium neglectum]	2.01598	1.01148	0.00644098	0.0272367	yes	up
TRINITY_DN18699_c0_g1	hypothetical protein CHLRE_01g031004v5 [Chlamydomonas reinhardtii]	2.56262	1.35762	2.4025e-15	1.67829e-13	yes	up
TRINITY_DN993_c0_g3	hypothetical protein CHLNCDRAFT_59751 [Chlorella variabilis]	4.24866	2.08701	1.24517e-23	2.17962e-21	yes	up
TRINITY_DN13289_c0_g4	hypothetical protein CEUSTIGMA_g7695.t1 [Chlamydomonas eustigma]	2.38485	1.2539	0.014473	0.0521287	yes	up
TRINITY_DN18721_c0_g1	DNA replication licensing factor mcm2 [Micractinium conductrix]	3.019	1.59407	1.16748e-15	8.72218e-14	yes	up
TRINITY_DN2560_c0_g11	hypothetical protein CEUSTIGMA_g8046.t1 [Chlamydomonas eustigma]	2.01747	1.01255	0.000147413	0.00116491	yes	up
TRINITY_DN2560_c0_g4	hypothetical protein CEUSTIGMA_g8046.t1 [Chlamydomonas eustigma]	2.03613	1.02583	0.0270774	0.0848155	yes	up
TRINITY_DN6050_c0_g1	Phosphoglycerate kinase [Tetrabaena socialis]	2.61601	1.38737	0.00028585	0.00204572	yes	up
TRINITY_DN6050_c0_g2	phosphoglycerate kinase [Chlamydomonas reinhardtii]	2.39146	1.25789	2.29129e-22	3.65006e-20	yes	up
TRINITY_DN25645_c0_g1	DNA mismatch repair MSH6 isoform A [Chlorella sorokiniana]	3.48946	1.803	4.33453e-16	3.41634e-14	yes	up
TRINITY_DN7646_c0_g3	hypothetical protein GPECTOR_78g81 [Gonium pectorale]	2.0352	1.02517	5.50461e-07	8.97308e-06	yes	up
TRINITY_DN8501_c0_g1	hypothetical protein GPECTOR_4g668 [Gonium pectorale]	2.07544	1.05342	0.000313186	0.00221452	yes	up
TRINITY_DN4877_c0_g1	hypothetical protein CEUSTIGMA_g4808.t1 [Chlamydomonas eustigma]	2.70319	1.43466	0.0114951	0.0434411	yes	up
TRINITY_DN8643_c0_g1	beta-Ig-H3 fasciclin [Chlorella sorokiniana]	2.15648	1.10868	0.000552357	0.00358027	yes	up
TRINITY_DN41_c1_g1	coproporphyrinogen III oxidase [Chlamydomonas reinhardtii]	2.21719	1.14873	4.30716e-11	1.59901e-09	yes	up
TRINITY_DN7140_c0_g2	presequence protease chloroplastic mitochondrial-like [Micractinium conductrix]	13.1043	3.71196	4.81716e-05	0.000446674	yes	up
TRINITY_DN19016_c0_g1	predicted protein [Chlamydomonas reinhardtii]	2.75257	1.46078	2.61401e-12	1.19066e-10	yes	up
TRINITY_DN85_c0_g1	psbA gene product (chloroplast) [Dunaliella salina]	5.73628	2.52012	0.000137618	0.00110051	yes	up
TRINITY_DN10612_c0_g1	photosystem II protein D2 (plastid) [Dunaliella tertiolecta]	2.13098	1.09152	0.0037776	0.0175871	yes	up
TRINITY_DN5403_c0_g1	photosystem II 47 kDa protein [Parachlorella kessleri]	10.3418	3.37042	1.728e-06	2.47039e-05	yes	up
TRINITY_DN20483_c0_g1	photosystem II 44 kDa protein [Parachlorella kessleri]	14.3393	3.84191	1.09181e-13	6.07622e-12	yes	up
TRINITY_DN10312_c0_g1	meiotic recombination [Chlorella sorokiniana]	2.49452	1.31876	4.6805e-08	9.75903e-07	yes	up
TRINITY_DN26457_c0_g1	meiotic recombination [Chlorella sorokiniana]	2.50068	1.32232	5.9066e-06	7.2291e-05	yes	up
TRINITY_DN20657_c0_g1	hypothetical protein GPECTOR_28g797 [Gonium pectorale]	2.12368	1.08657	6.95529e-14	3.97362e-12	yes	up
TRINITY_DN133_c3_g1	photosystem I light-harvesting cholrophyll-a/b protein 3 [Dunaliella salina]	2.07707	1.05455	1.0906e-13	6.07622e-12	yes	up
TRINITY_DN3603_c0_g2	floral homeotic [Chlorella sorokiniana]	3.43548	1.78051	6.61335e-12	2.80443e-10	yes	up
TRINITY_DN4274_c0_g1	hypothetical protein CHLNCDRAFT_137319 [Chlorella variabilis]	2.44112	1.28754	1.52678e-09	4.31221e-08	yes	up
TRINITY_DN7989_c0_g7	hypothetical protein CEUSTIGMA_g1573.t1 [Chlamydomonas eustigma]	2.02992	1.02142	0.0312405	0.0947029	yes	up
TRINITY_DN9612_c0_g1	hypothetical protein CHLRE_10g435400v5 [Chlamydomonas reinhardtii]	3.98535	1.9947	2.6568e-15	1.83466e-13	yes	up
TRINITY_DN7836_c0_g1	hypothetical protein VOLCADRAFT_106114 [Volvox carteri f. nagariensis]	2.90512	1.5386	0.0487919	0.133937	yes	up
TRINITY_DN6667_c0_g3	hypothetical protein C2E20_0744 [Micractinium conductrix]	5.03329	2.3315	2.64525e-08	5.86906e-07	yes	up
TRINITY_DN1302_c0_g1	hypothetical protein CEUSTIGMA_g6819.t1 [Chlamydomonas eustigma]	2.11665	1.08178	3.35222e-08	7.27675e-07	yes	up
TRINITY_DN11987_c0_g1	hypothetical protein CEUSTIGMA_g682.t1 [Chlamydomonas eustigma]	2.26651	1.18047	9.98881e-11	3.46878e-09	yes	up
TRINITY_DN7767_c0_g1	IST1 [Chlorella sorokiniana]	2.15292	1.10629	5.6062e-12	2.41476e-10	yes	up
TRINITY_DN9751_c0_g7	hypothetical protein GPECTOR_12g411 [Gonium pectorale]	3.70701	1.89025	0.0252028	0.0802883	yes	up
TRINITY_DN18970_c0_g1	hypothetical protein Rsub_12313 [Raphidocelis subcapitata]	2.59588	1.37622	0.0317652	0.0959553	yes	up
TRINITY_DN10338_c0_g8	flagellar associated protein [Chlamydomonas reinhardtii]	2.18867	1.13006	7.40696e-05	0.000647152	yes	up
TRINITY_DN17920_c0_g1	predicted protein [Micromonas commoda]	6.85383	2.77691	0.0132619	0.0485695	yes	up
TRINITY_DN8119_c1_g1	photosystem II protein H [Parachlorella kessleri]	12.5197	3.64613	1.03648e-05	0.000118656	yes	up
TRINITY_DN16828_c0_g1	hypothetical chloroplast RF47 (chloroplast) [Dicloster acuatus]	5.74491	2.52228	0.00356235	0.0167508	yes	up
TRINITY_DN24082_c0_g1	hypothetical protein Rsub_09760 [Raphidocelis subcapitata]	2.7102	1.4384	8.61525e-10	2.55303e-08	yes	up
TRINITY_DN8352_c0_g1	Methionine gamma-lyase isoform B [Micractinium conductrix]	2.11279	1.07915	0.00862556	0.0344656	yes	up
TRINITY_DN8122_c0_g5	hypothetical protein CEUSTIGMA_g6516.t1 [Chlamydomonas eustigma]	2.70426	1.43523	0.0341241	0.101302	yes	up
TRINITY_DN5639_c0_g1	hypothetical protein Rsub_11332 [Raphidocelis subcapitata]	2.33589	1.22397	2.39943e-05	0.000244474	yes	up
TRINITY_DN47_c0_g1	chromatin modification-related EAF1 B isoform X1 [Micractinium conductrix]	2.07926	1.05607	5.64207e-13	2.80779e-11	yes	up
TRINITY_DN19146_c0_g1	hypothetical protein Rsub_07056 [Raphidocelis subcapitata]	4.21952	2.07708	3.87072e-05	0.000370791	yes	up
TRINITY_DN10597_c1_g4	predicted protein [Chlamydomonas reinhardtii]	2.68696	1.42597	0.0314156	0.0951474	yes	up
TRINITY_DN2605_c0_g2	hypothetical protein CHLNCDRAFT_33088 [Chlorella variabilis]	2.3159	1.21157	3.9678e-12	1.7568e-10	yes	up
TRINITY_DN10330_c0_g1	hypothetical protein GPECTOR_22g824 [Gonium pectorale]	2.29492	1.19845	1.7891e-06	2.54687e-05	yes	up
TRINITY_DN2381_c0_g1	sulfur stress regulator isoform B [Chlorella sorokiniana]	3.41212	1.77067	1.0276e-15	7.75413e-14	yes	up
TRINITY_DN10413_c0_g3	hypothetical protein CEUSTIGMA_g9080.t1 [Chlamydomonas eustigma]	2.2318	1.15821	0.0243674	0.0782563	yes	up
TRINITY_DN12369_c0_g1	hypothetical protein C2E20_8527 [Micractinium conductrix]	7.06326	2.82033	2.74781e-28	8.35669e-26	yes	up
TRINITY_DN10089_c0_g1	peptidyl-prolyl cis-trans isomerase, partial [Coccomyxa subellipsoidea C-169]	2.14706	1.10236	0.0297432	0.0910255	yes	up
TRINITY_DN5819_c0_g1	hypothetical protein CHLNCDRAFT_139528 [Chlorella variabilis]	4.35133	2.12146	1.46447e-18	1.57472e-16	yes	up
TRINITY_DN9325_c0_g1	heat shock protein 22A [Chlamydomonas reinhardtii]	2.71573	1.44134	8.59e-08	1.68707e-06	yes	up
TRINITY_DN7130_c0_g1	heat shock protein 22A [Chlamydomonas reinhardtii]	5.82372	2.54194	0.0104606	0.0402694	yes	up
TRINITY_DN20687_c0_g1	heat shock Hsp20 [Micractinium conductrix]	7.9954	2.99917	3.12993e-06	4.15136e-05	yes	up
TRINITY_DN1785_c0_g1	UDP-N-acetylglucosamine--dolichyl-phosphate N-acetylglucosaminephosphotransferase [Chlorella sorokiniana]	2.26198	1.17758	2.862e-16	2.29784e-14	yes	up
TRINITY_DN1519_c0_g1	hypothetical protein CEUSTIGMA_g6965.t1 [Chlamydomonas eustigma]	2.72896	1.44835	3.46742e-11	1.31815e-09	yes	up
TRINITY_DN1519_c0_g2	hypothetical protein CEUSTIGMA_g6965.t1 [Chlamydomonas eustigma]	2.36728	1.24323	1.29268e-06	1.91725e-05	yes	up
TRINITY_DN5432_c0_g1	predicted protein [Chlamydomonas reinhardtii]	2.03658	1.02615	6.40772e-05	0.000570274	yes	up
TRINITY_DN13481_c0_g3	hypothetical protein COCSUDRAFT_28166 [Coccomyxa subellipsoidea C-169]	7.95033	2.99101	0.0296022	0.0907315	yes	up
TRINITY_DN14654_c0_g2	hypothetical protein COCSUDRAFT_28166 [Coccomyxa subellipsoidea C-169]	25.2104	4.65595	0.0136419	0.0496649	yes	up
TRINITY_DN405_c1_g1	hypothetical protein VOLCADRAFT_61636 [Volvox carteri f. nagariensis]	2.50062	1.32228	1.33554e-09	3.79702e-08	yes	up
TRINITY_DN15214_c0_g1	hypothetical protein CBR_g8305 [Chara braunii]	17.3935	4.12047	0.0171177	0.059403	yes	up
TRINITY_DN405_c0_g1	hypothetical protein GPECTOR_69g431 [Gonium pectorale]	2.26819	1.18154	1.13695e-10	3.90767e-09	yes	up
TRINITY_DN22355_c0_g1	endoplasmic reticulum oxidoreductin 1 [Coccomyxa subellipsoidea C-169]	2.42594	1.27855	4.03216e-08	8.56742e-07	yes	up
TRINITY_DN16470_c0_g5	putative ADP-ribosylation factor GTPase-activating AGD15 isoform A [Chlorella sorokiniana]	47.7915	5.57868	3.7364e-23	6.35569e-21	yes	up
TRINITY_DN3208_c0_g1	Estradiol 17-beta-dehydrogenase 12 [Micractinium conductrix]	2.61793	1.38842	4.44794e-21	6.37707e-19	yes	up
TRINITY_DN4408_c0_g6	MMS19 nucleotide excision repair-like protein isoform X2 [Chlorella sorokiniana]	2.39204	1.25824	1.73284e-05	0.000185799	yes	up
TRINITY_DN5455_c0_g2	hypothetical protein CHLNCDRAFT_10299, partial [Chlorella variabilis]	6.47176	2.69416	0.000265238	0.00192243	yes	up
TRINITY_DN14200_c0_g1	hypothetical protein CEUSTIGMA_g1162.t1 [Chlamydomonas eustigma]	3.64831	1.86723	2.36736e-20	3.15382e-18	yes	up
TRINITY_DN23907_c0_g1	hypothetical protein CEUSTIGMA_g5059.t1 [Chlamydomonas eustigma]	2.1188	1.08325	8.14798e-06	9.55294e-05	yes	up
TRINITY_DN3151_c1_g3	ALBINO3 chloroplastic isoform X2 [Micractinium conductrix]	11.6842	3.54649	0.000109504	0.000904515	yes	up
TRINITY_DN711_c0_g1	hypothetical protein CHLNCDRAFT_59779 [Chlorella variabilis]	2.05918	1.04207	6.36535e-09	1.59044e-07	yes	up
TRINITY_DN8361_c0_g1	nuclear pore complex NUP107 isoform B [Micractinium conductrix]	2.19203	1.13227	0.000358541	0.0024816	yes	up
TRINITY_DN5947_c0_g2	predicted protein [Chlamydomonas reinhardtii]	4.41779	2.14333	2.74928e-19	3.24609e-17	yes	up
TRINITY_DN15444_c0_g1	granule-bound starch [Micractinium conductrix]	2.37499	1.24792	0.0109006	0.0415912	yes	up
TRINITY_DN21839_c0_g1	hypothetical protein H632_c1777p0 [Helicosporidium sp. ATCC 50920]	2.16443	1.11399	4.46347e-13	2.23233e-11	yes	up
TRINITY_DN3198_c0_g1	hypothetical protein VOLCADRAFT_105313 [Volvox carteri f. nagariensis]	2.05355	1.03812	5.01693e-05	0.000462633	yes	up
TRINITY_DN8483_c2_g2	BTB POZ domain-containing KCTD21 [Chlorella sorokiniana]	2.13777	1.0961	0.00487756	0.0216598	yes	up
TRINITY_DN20589_c0_g1	Tetratricopeptide-like helical [Chlorella sorokiniana]	2.02546	1.01825	0.000443447	0.00297754	yes	up
TRINITY_DN12293_c0_g4	hypothetical protein CHLNCDRAFT_144074 [Chlorella variabilis]	2.38765	1.25559	5.63582e-11	2.0538e-09	yes	up
TRINITY_DN440_c0_g2	methyltransferase fkbm family isoform B [Chlorella sorokiniana]	2.06956	1.04932	1.68715e-05	0.000181806	yes	up
TRINITY_DN23950_c0_g1	Beta-1,3-galactosyltransferase 6 [Micractinium conductrix]	3.80608	1.92831	9.1461e-41	6.25843e-38	yes	up
TRINITY_DN19202_c0_g1	hypothetical protein CEUSTIGMA_g3175.t1 [Chlamydomonas eustigma]	25.6131	4.67881	0.0135575	0.0494354	yes	up
TRINITY_DN5204_c0_g2	expressed protein [Chlorella variabilis]	4.33897	2.11735	1.29971e-49	1.50506e-46	yes	up
TRINITY_DN431_c0_g4	Alpha-1,3-mannosyl-glyco 2-beta-N-acetylglucosaminyltransferase [Chlorella sorokiniana]	2.04687	1.03342	6.68284e-14	3.85454e-12	yes	up
TRINITY_DN11596_c0_g1	hypothetical protein CHLNCDRAFT_30982 [Chlorella variabilis]	2.59921	1.37807	4.47799e-12	1.95396e-10	yes	up
TRINITY_DN10332_c0_g1	deoxyhypusine hydroxylase [Volvox carteri f. nagariensis]	2.02039	1.01464	1.28954e-05	0.000143745	yes	up
TRINITY_DN3678_c0_g3	putative dolichyl pyrophosphate Glc1Man9 c2 alpha-1,3-glucosyltransferase [Chlorella sorokiniana]	2.14348	1.09995	2.90162e-05	0.000288419	yes	up
TRINITY_DN315_c2_g1	heat shock 70B [Micractinium conductrix]	28.7889	4.84744	0.010376	0.0400003	yes	up
TRINITY_DN4743_c0_g2	peptidyl-prolyl cis-trans isomerase H isoform B [Micractinium conductrix]	2.09766	1.06878	1.98467e-05	0.000208204	yes	up
TRINITY_DN12900_c0_g1	hypothetical protein CEUSTIGMA_g2957.t1 [Chlamydomonas eustigma]	7.43446	2.89423	0.0134546	0.0491494	yes	up
TRINITY_DN15045_c1_g1	hypothetical protein GPECTOR_39g402 [Gonium pectorale]	56.8846	5.82997	0.000198933	0.00150225	yes	up
TRINITY_DN6340_c0_g1	hypothetical protein CEUSTIGMA_g8495.t1 [Chlamydomonas eustigma]	2.14764	1.10275	3.87506e-14	2.32411e-12	yes	up
TRINITY_DN19434_c0_g1	heat shock 33 [Micractinium conductrix]	2.53507	1.34203	0.0308039	0.0936716	yes	up
TRINITY_DN23895_c0_g1	succinate dehydrogenase subunit b560 [Chlorella sorokiniana]	2.28954	1.19506	0.00126153	0.00713682	yes	up
TRINITY_DN6928_c0_g4	hypothetical protein CHLNCDRAFT_138873 [Chlorella variabilis]	2.153	1.10635	1.59615e-11	6.42473e-10	yes	up
TRINITY_DN5926_c0_g1	L-ascorbate oxidase [Chlorella sorokiniana]	3.53535	1.82185	1.16697e-08	2.77748e-07	yes	up
TRINITY_DN345_c0_g1	TPR repeat-containing [Chlorella sorokiniana]	2.59291	1.37457	8.23409e-17	7.04295e-15	yes	up
TRINITY_DN18157_c0_g1	hypothetical protein Rsub_01761 [Raphidocelis subcapitata]	2.06452	1.04581	5.7493e-05	0.000519196	yes	up
TRINITY_DN7386_c0_g1	hypothetical protein CHLNCDRAFT_133862 [Chlorella variabilis]	2.22798	1.15574	4.76602e-13	2.37969e-11	yes	up
TRINITY_DN4401_c0_g2	hypothetical protein APUTEX25_004238 [Auxenochlorella protothecoides]	2.22666	1.15488	2.19678e-09	5.991e-08	yes	up
TRINITY_DN6523_c0_g1	hypothetical protein VOLCADRAFT_73112 [Volvox carteri f. nagariensis]	27.7517	4.7945	3.84436e-19	4.48628e-17	yes	up
TRINITY_DN6450_c0_g1	hypothetical protein GPECTOR_35g891 [Gonium pectorale]	24.9911	4.64334	0.000277883	0.00199964	yes	up
TRINITY_DN4507_c0_g1	hypothetical protein CHLNCDRAFT_142831 [Chlorella variabilis]	2.10733	1.07541	2.95562e-13	1.529e-11	yes	up
TRINITY_DN3658_c0_g1	hypothetical protein CEUSTIGMA_g9784.t1 [Chlamydomonas eustigma]	2.80695	1.489	1.82478e-10	6.03077e-09	yes	up
TRINITY_DN6182_c2_g1	hypothetical protein GPECTOR_12g560 [Gonium pectorale]	4.38575	2.13282	2.94017e-18	3.01097e-16	yes	up
TRINITY_DN4037_c0_g1	hypothetical protein CHLRE_16g670850v5 [Chlamydomonas reinhardtii]	2.54905	1.34996	5.90352e-05	0.00053137	yes	up
TRINITY_DN6606_c0_g2	hypothetical protein GPECTOR_13g762 [Gonium pectorale]	5.61219	2.48856	0.0327881	0.0983643	yes	up
TRINITY_DN2579_c0_g4	hypothetical protein [Dunaliella viridis]	2.41014	1.26912	2.07961e-06	2.90817e-05	yes	up
TRINITY_DN10963_c0_g1	hypothetical protein [Dunaliella viridis]	7.34375	2.87652	0.000167984	0.0013011	yes	up
TRINITY_DN15367_c1_g2	hypothetical protein [Dunaliella viridis]	53.4983	5.74142	0.00028911	0.00206665	yes	up
TRINITY_DN4787_c0_g1	hypothetical protein [Dunaliella viridis]	2.02067	1.01483	0.00108459	0.00629307	yes	up
TRINITY_DN5077_c1_g1	hypothetical protein [Dunaliella viridis]	11.914	3.57458	0.00554136	0.0240333	yes	up
TRINITY_DN6432_c0_g1	hypothetical protein [Dunaliella viridis]	2.24118	1.16426	0.00969403	0.0378488	yes	up
TRINITY_DN9864_c1_g4	hypothetical protein [Dunaliella viridis]	22.3403	4.48158	0.0197318	0.0663439	yes	up
TRINITY_DN14049_c3_g1	hypothetical protein [Dunaliella viridis]	18.9522	4.24429	0.0390925	0.11282	yes	up
TRINITY_DN14053_c0_g1	hypothetical protein [Dunaliella viridis]	2.23368	1.15942	0.0395842	0.113852	yes	up
TRINITY_DN5945_c1_g1	hypothetical protein [Dunaliella viridis]	5.07083	2.34222	0.0401777	0.115064	yes	up
TRINITY_DN15367_c0_g1	hypothetical protein [Dunaliella viridis]	2.02879	1.02062	2.31119e-05	0.000237331	yes	up
TRINITY_DN15367_c0_g2	hypothetical protein [Dunaliella viridis]	4.15382	2.05444	0.0107198	0.0410729	yes	up
TRINITY_DN6623_c0_g2	hypothetical protein [Dunaliella viridis]	3.26231	1.70589	0.0169614	0.0589691	yes	up
TRINITY_DN9342_c0_g2	ubiquitin carboxyl-terminal hydrolase-related [Micractinium conductrix]	2.97582	1.57329	0.0194574	0.0656237	yes	up
TRINITY_DN1331_c0_g2	predicted protein [Chlamydomonas reinhardtii]	2.00355	1.00256	1.13763e-05	0.000128815	yes	up
TRINITY_DN2004_c0_g1	UPF0187 chloroplastic [Chlorella sorokiniana]	2.3942	1.25954	1.52814e-08	3.56937e-07	yes	up
TRINITY_DN6839_c0_g1	hypothetical protein MNEG_9845 [Monoraphidium neglectum]	3.05665	1.61195	8.18826e-17	7.0237e-15	yes	up
TRINITY_DN7587_c0_g1	hypothetical protein CHLNCDRAFT_21770 [Chlorella variabilis]	3.76765	1.91367	3.4316e-16	2.73329e-14	yes	up
TRINITY_DN16478_c0_g1	hypothetical protein CEUSTIGMA_g709.t1 [Chlamydomonas eustigma]	2.03491	1.02496	0.000184164	0.00140482	yes	up
TRINITY_DN7990_c0_g1	Pyrroline-5-carboxylate reductase [Auxenochlorella protothecoides]	2.10491	1.07376	1.45893e-05	0.000159671	yes	up
TRINITY_DN19051_c0_g1	ribonucleoside-diphosphate reductase small chain isoform A [Chlorella sorokiniana]	4.397	2.13652	4.03106e-25	8.54698e-23	yes	up
TRINITY_DN20954_c0_g1	hypothetical protein CEUSTIGMA_g1342.t1 [Chlamydomonas eustigma]	2.15689	1.10895	1.02313e-12	4.9366e-11	yes	up
TRINITY_DN13895_c0_g2	hypothetical protein CEUSTIGMA_g10943.t1 [Chlamydomonas eustigma]	3.49924	1.80704	0.00794045	0.0322633	yes	up
TRINITY_DN20712_c0_g1	hypothetical protein CHLRE_03g174000v5 [Chlamydomonas reinhardtii]	2.35663	1.23672	1.87369e-06	2.64975e-05	yes	up
TRINITY_DN13081_c0_g3	hypothetical protein CHLRE_08g380250v5 [Chlamydomonas reinhardtii]	6.4921	2.69869	0.00277117	0.0136442	yes	up
TRINITY_DN9019_c0_g3	hypothetical protein CHLNCDRAFT_134308 [Chlorella variabilis]	2.34294	1.22832	0.000111234	0.000916381	yes	up
TRINITY_DN2738_c0_g1	zinc finger (C3HC4 RING finger) [Micractinium conductrix]	5.02342	2.32867	3.96388e-25	8.54698e-23	yes	up
TRINITY_DN8754_c1_g3	hypothetical protein GPECTOR_18g101 [Gonium pectorale]	2.73888	1.45358	2.6329e-07	4.64662e-06	yes	up
TRINITY_DN1297_c0_g2	hypothetical protein C2E20_4308 [Micractinium conductrix]	2.47364	1.30663	3.52584e-18	3.55037e-16	yes	up
TRINITY_DN10881_c0_g1	hypothetical protein CHLRE_16g656150v5 [Chlamydomonas reinhardtii]	2.03915	1.02797	0.00796122	0.0323259	yes	up
TRINITY_DN1858_c1_g1	CWF19 2 [Chlorella sorokiniana]	2.93255	1.55216	4.91674e-17	4.39268e-15	yes	up
TRINITY_DN6927_c0_g1	hypothetical protein MNEG_0227 [Monoraphidium neglectum]	2.00785	1.00565	0.0151598	0.0540588	yes	up
TRINITY_DN15030_c0_g4	psbZ gene product (chloroplast) [Dunaliella salina]	5.0263	2.3295	1.30391e-06	1.93294e-05	yes	up
TRINITY_DN9767_c0_g3	photosystem II protein Z (plastid) [Micractinium conductrix]	44.2247	5.46678	0.000629137	0.00398933	yes	up
TRINITY_DN9227_c0_g2	RecName: Full=Oxygen-evolving enhancer protein 1, chloroplastic;	5.18793	2.37516	0.00603483	0.0258129	yes	up
TRINITY_DN10612_c0_g3	subunit VII of photosystem I (Fe-Spolypeptide) (chloroplast) [Xylochloris irregularis]	8.20639	3.03675	8.62867e-07	1.33844e-05	yes	up
TRINITY_DN9890_c0_g1	Cytochrome b559 subunit alpha [Auxenochlorella protothecoides]	7.61154	2.92819	5.01533e-16	3.91196e-14	yes	up
TRINITY_DN21702_c0_g1	oxygen-evolving enhancer protein 3 [Volvox carteri f. nagariensis]	2.58462	1.36995	2.0075e-17	1.86549e-15	yes	up
TRINITY_DN26566_c0_g1	hypothetical protein GPECTOR_59g635 [Gonium pectorale]	2.15533	1.10791	6.68759e-05	0.00059238	yes	up
TRINITY_DN7754_c0_g1	Niemann-Pick C1 [Chlorella sorokiniana]	2.25136	1.1708	0.000170643	0.00131804	yes	up
TRINITY_DN19354_c0_g1	apocytochrome f of cytochrome b6/f complex (chloroplast) [Dicloster acuatus]	2.70113	1.43356	0.0124962	0.0463746	yes	up
TRINITY_DN8961_c0_g1	PNG99991.1(Photosystem I reaction center subunit IV, chloroplastic [Tetrabaena socialis])	2.2016	1.13855	4.06991e-13	2.04569e-11	yes	up
TRINITY_DN8961_c0_g1	Photosystem I reaction center subunit IV, chloroplastic [Tetrabaena socialis]	2.2016	1.13855	4.06991e-13	2.04569e-11	yes	up
TRINITY_DN5623_c0_g3	hypothetical chloroplast RF12 (chloroplast) [Chlamydomonas applanata]	8.86369	3.14791	0.0149624	0.0534959	yes	up
TRINITY_DN6188_c0_g1	hypothetical chloroplast RF3 (chloroplast) [Dicloster acuatus]	90.7663	6.50409	3.59782e-06	4.67514e-05	yes	up
TRINITY_DN6909_c0_g5	oxygen-evolving enhancer protein 2 [Volvox carteri f. nagariensis]	3.38879	1.76077	0.00567353	0.024509	yes	up
TRINITY_DN8119_c1_g10	M protein of photosystem II (chloroplast) [Dicloster acuatus]	21.639	4.43556	4.48622e-05	0.000420651	yes	up
TRINITY_DN4271_c0_g1	photochlorophyllide reductase subunit N [Parachlorella kessleri]	4.24831	2.08689	3.0398e-07	5.28725e-06	yes	up
TRINITY_DN1232_c0_g1	ribulose-1,5-bisphosphate carboxylase/oxygenase large subunit, partial (chloroplast) [Dunaliella sp. DN1]	6.53274	2.70769	2.2448e-10	7.30664e-09	yes	up
TRINITY_DN25067_c0_g1	Two-component response regulator ARR14 [Tetrabaena socialis]	2.11366	1.07975	2.36884e-07	4.2327e-06	yes	up
TRINITY_DN18985_c0_g1	LOV domain-containing [Micractinium conductrix]	2.45147	1.29365	9.93012e-09	2.40528e-07	yes	up
TRINITY_DN22869_c0_g1	two component transcriptional regulator, winged helix family [Ostreococcus tauri]	60.4722	5.9182	5.73583e-10	1.7486e-08	yes	up
TRINITY_DN3928_c0_g2	hypothetical protein COCSUDRAFT_11065, partial [Coccomyxa subellipsoidea C-169]	2.51779	1.33216	2.66015e-05	0.000267329	yes	up
TRINITY_DN4813_c0_g2	hypothetical protein CHLRE_13g602700v5 [Chlamydomonas reinhardtii]	2.76884	1.46928	0.0195732	0.0659426	yes	up
TRINITY_DN876_c0_g2	predicted protein [Chlamydomonas reinhardtii]	3.62385	1.85752	1.13698e-14	7.20678e-13	yes	up
TRINITY_DN1645_c1_g8	smilar to phosphatidylinositol 3- or 4-kinase [Chlamydomonas reinhardtii]	3.32715	1.73429	0.0168669	0.0587371	yes	up
TRINITY_DN10364_c0_g2	hypothetical protein APUTEX25_004222 [Auxenochlorella protothecoides]	4.34511	2.11939	0.0176861	0.0609485	yes	up
TRINITY_DN26614_c0_g1	sodium-coupled phosphate transporter protein [Dunaliella viridis]	46.4907	5.53887	0.00123888	0.00703776	yes	up
TRINITY_DN1021_c0_g1	sodium-dependent phosphate transporter [Dunaliella viridis]	2.3052	1.20489	5.88309e-14	3.43938e-12	yes	up
TRINITY_DN210_c0_g2	2,3-bisphosphoglycerate-independent phosphoglycerate mutase [Micractinium conductrix]	2.33654	1.22437	0.00235276	0.0119314	yes	up
TRINITY_DN767_c2_g6	hypothetical protein GPECTOR_20g484 [Gonium pectorale]	2.26761	1.18117	0.0455596	0.127187	yes	up
TRINITY_DN11010_c0_g2	hypothetical protein CHLRE_02g114200v5 [Chlamydomonas reinhardtii]	2.11873	1.0832	0.0107642	0.0412064	yes	up
TRINITY_DN5300_c1_g2	hypothetical protein CEUSTIGMA_g6708.t1 [Chlamydomonas eustigma]	2.13882	1.09681	0.000930749	0.00553814	yes	up
TRINITY_DN7846_c0_g2	hypothetical protein APUTEX25_004441 [Auxenochlorella protothecoides]	2.16589	1.11496	2.02568e-15	1.44183e-13	yes	up
TRINITY_DN8510_c0_g1	hypothetical protein GPECTOR_20g486 [Gonium pectorale]	2.07865	1.05565	2.95049e-06	3.94115e-05	yes	up
TRINITY_DN12281_c0_g1	S-adenosyl-L-methionine-dependent methyltransferases superfamily protein [Klebsormidium nitens]	2.6003	1.37868	0.000155572	0.00121979	yes	up
TRINITY_DN10439_c0_g1	ketopantoate hydroxymethyltransferase [Chlamydomonas reinhardtii]	2.52846	1.33826	4.07993e-14	2.43728e-12	yes	up
TRINITY_DN39_c0_g1	hypothetical protein CEUSTIGMA_g54.t1 [Chlamydomonas eustigma]	17.5413	4.13268	1.80335e-92	7.75645e-89	yes	up
TRINITY_DN24010_c0_g1	LEDI-3 protein [Coccomyxa subellipsoidea C-169]	3.47007	1.79497	8.14197e-21	1.15631e-18	yes	up
TRINITY_DN8618_c2_g1	NADPH dependent alkenal/alkenone reductase [Dunaliella salina]	2.65986	1.41135	4.03711e-16	3.20711e-14	yes	up
TRINITY_DN998_c1_g1	hypothetical protein CEUSTIGMA_g11165.t1 [Chlamydomonas eustigma]	3.10547	1.63481	0.000345669	0.00240745	yes	up
TRINITY_DN4645_c0_g1	hypothetical protein GPECTOR_11g273 [Gonium pectorale]	2.20595	1.1414	3.31798e-13	1.69606e-11	yes	up
TRINITY_DN5024_c0_g1	hypothetical protein GPECTOR_11g273 [Gonium pectorale]	2.47979	1.31022	3.08091e-07	5.35258e-06	yes	up
TRINITY_DN5059_c0_g7	hypothetical protein MNEG_9869 [Monoraphidium neglectum]	2.27951	1.18873	0.00209615	0.0108849	yes	up
TRINITY_DN5754_c1_g1	hypothetical protein GPECTOR_36g98 [Gonium pectorale]	3.1758	1.66712	0.000599304	0.00383159	yes	up
TRINITY_DN4024_c0_g1	hypothetical protein CHLNCDRAFT_144363 [Chlorella variabilis]	2.66726	1.41536	2.02032e-17	1.87163e-15	yes	up
TRINITY_DN12908_c0_g2	Adenylate kinase 1, mitochondrial [Auxenochlorella protothecoides]	2.46454	1.30132	0.0325738	0.0978579	yes	up
TRINITY_DN6090_c0_g1	Fanconi anemia group J [Chlorella sorokiniana]	2.95665	1.56396	7.23291e-06	8.57018e-05	yes	up
TRINITY_DN2545_c2_g7	hypothetical protein CEUSTIGMA_g10059.t1 [Chlamydomonas eustigma]	2.11554	1.08103	0.00313602	0.0151337	yes	up
TRINITY_DN26544_c0_g1	hypothetical protein CHLNCDRAFT_145410 [Chlorella variabilis]	2.02821	1.0202	3.40725e-06	4.46996e-05	yes	up
TRINITY_DN9555_c0_g1	Cytochrome b6-f complex iron-sulfur chloroplastic [Chlorella sorokiniana]	4.08465	2.03021	2.37716e-11	9.27093e-10	yes	up
TRINITY_DN5778_c0_g1	hypothetical protein CEUSTIGMA_g440.t1 [Chlamydomonas eustigma]	2.09521	1.0671	1.86806e-09	5.1742e-08	yes	up
TRINITY_DN2561_c0_g1	nitrate reductase [Chlorella vulgaris]	2.05254	1.03741	1.13033e-07	2.15391e-06	yes	up
TRINITY_DN3186_c0_g4	hypothetical protein CEUSTIGMA_g11332.t1 [Chlamydomonas eustigma]	2.09747	1.06865	0.0214987	0.0709352	yes	up
TRINITY_DN4029_c0_g1	isocitrate dehydrogenase, NADP-dependent, mitochondrial [Volvox carteri f. nagariensis]	2.17825	1.12317	1.05123e-06	1.58808e-05	yes	up
TRINITY_DN3955_c0_g2	hypothetical protein CEUSTIGMA_g12879.t1 [Chlamydomonas eustigma]	2.55979	1.35603	0.000337179	0.00235978	yes	up
TRINITY_DN20793_c0_g1	flagellar associated isoform A [Chlorella sorokiniana]	2.72688	1.44725	0.0406936	0.116232	yes	up
TRINITY_DN7426_c0_g1	actin related protein2 [Parachlorella kessleri]	6.48623	2.69738	2.19727e-32	8.16734e-30	yes	up
TRINITY_DN9661_c0_g2	hypothetical protein CEUSTIGMA_g9262.t1 [Chlamydomonas eustigma]	2.42366	1.27719	5.92791e-14	3.45218e-12	yes	up
TRINITY_DN14981_c0_g1	hypothetical protein CHLNCDRAFT_53051 [Chlorella variabilis]	2.76428	1.46691	0.0323494	0.0972907	yes	up
TRINITY_DN2148_c0_g1	vacuolar-sorting receptor 1-like [Chlorella sorokiniana]	3.01017	1.58985	2.28491e-25	5.0584e-23	yes	up
TRINITY_DN12139_c0_g1	hypothetical protein CHLNCDRAFT_51470 [Chlorella variabilis]	2.52479	1.33616	2.16742e-18	2.2817e-16	yes	up
TRINITY_DN7226_c0_g1	50S ribosomal protein L7/L12 [Auxenochlorella protothecoides]	2.29976	1.20148	6.34574e-11	2.29913e-09	yes	up
TRINITY_DN7714_c0_g1	predicted protein [Chlamydomonas reinhardtii]	3.81225	1.93064	2.00744e-15	1.43563e-13	yes	up
TRINITY_DN4738_c0_g1	hypothetical protein CEUSTIGMA_g5612.t1 [Chlamydomonas eustigma]	2.45251	1.29426	1.64716e-14	1.01833e-12	yes	up
TRINITY_DN13104_c0_g1	hypothetical protein VOLCADRAFT_105635 [Volvox carteri f. nagariensis]	2.28358	1.1913	1.47254e-06	2.14803e-05	yes	up
TRINITY_DN1795_c0_g1	hypothetical protein CEUSTIGMA_g9586.t1 [Chlamydomonas eustigma]	2.72694	1.44728	9.85726e-12	4.06551e-10	yes	up
TRINITY_DN12803_c0_g2	hypothetical protein Rsub_08541 [Raphidocelis subcapitata]	24.5797	4.61939	7.86403e-06	9.24161e-05	yes	up
TRINITY_DN6752_c1_g2	cytoplasmic dynein 1b light intermediate chain, D1bLIC [Chlamydomonas reinhardtii]	2.15442	1.1073	1.67846e-06	2.40988e-05	yes	up
TRINITY_DN5808_c0_g2	hypothetical protein CHLRE_07g355550v5 [Chlamydomonas reinhardtii]	2.70265	1.43438	7.09811e-08	1.42284e-06	yes	up
TRINITY_DN20978_c0_g1	hypothetical protein CHLRE_03g150650v5 [Chlamydomonas reinhardtii]	2.06773	1.04805	2.58073e-09	6.91552e-08	yes	up
TRINITY_DN6983_c0_g2	hypothetical protein CEUSTIGMA_g7341.t1 [Chlamydomonas eustigma]	2.33436	1.22302	0.00191528	0.0101313	yes	up
TRINITY_DN22709_c0_g1	hypothetical protein Rsub_03119 [Raphidocelis subcapitata]	2.21982	1.15044	0.0270855	0.0848293	yes	up
TRINITY_DN6530_c0_g1	alanine--glyoxylate aminotransferase 2-like protein mitochondrial [Chlorella sorokiniana]	2.33189	1.2215	7.00904e-11	2.51224e-09	yes	up
TRINITY_DN7683_c0_g2	hypothetical protein APUTEX25_001065, partial [Auxenochlorella protothecoides]	7.62574	2.93088	4.60396e-05	0.000430084	yes	up
TRINITY_DN24589_c0_g1	50S ribosomal L23 [Micractinium conductrix]	2.63211	1.39622	1.48411e-13	8.09486e-12	yes	up
TRINITY_DN2707_c0_g5	hypothetical protein CEUSTIGMA_g8798.t1 [Chlamydomonas eustigma]	2.82816	1.49986	5.13393e-14	3.03678e-12	yes	up
TRINITY_DN17872_c0_g1	predicted protein [Ostreococcus lucimarinus CCE9901]	48.5095	5.60019	0.000421749	0.00285349	yes	up
TRINITY_DN6541_c0_g1	mitochondrial inner membrane signal peptidase [Chlamydomonas reinhardtii]	2.62023	1.3897	1.33585e-11	5.41317e-10	yes	up
TRINITY_DN4157_c1_g1	hypothetical protein GPECTOR_10g932 [Gonium pectorale]	2.167	1.1157	0.000112265	0.000923267	yes	up
TRINITY_DN19353_c0_g1	hypothetical protein GPECTOR_46g242 [Gonium pectorale]	2.15881	1.11023	1.46036e-13	7.97979e-12	yes	up
TRINITY_DN7261_c0_g2	cytochrome b (mitochondrion) [Chlorella heliozoae]	4.40573	2.13938	2.55829e-05	0.000258396	yes	up
TRINITY_DN17552_c0_g2	predicted protein [Micromonas pusilla CCMP1545]	65.5158	6.03377	8.62844e-05	0.000737188	yes	up
TRINITY_DN17552_c0_g1	NADH dehydrogenase, partial [Micromonas sp. CCMP1646]	19.8585	4.31168	0.0384329	1	yes	up
TRINITY_DN1910_c1_g4	hypothetical protein CEUSTIGMA_g10544.t1 [Chlamydomonas eustigma]	2.05192	1.03698	0.00647207	0.0273451	yes	up
TRINITY_DN5787_c1_g3	hypothetical protein C2E20_3736 [Micractinium conductrix]	2.09514	1.06705	3.03606e-05	0.000298823	yes	up
TRINITY_DN13032_c1_g1	DNA mismatch repair MSH6 isoform B [Chlorella sorokiniana]	2.99342	1.58179	1.45055e-09	4.10461e-08	yes	up
TRINITY_DN10455_c0_g3	hypothetical protein VOLCADRAFT_94705 [Volvox carteri f. nagariensis]	3.81871	1.93309	0.000859296	0.00517537	yes	up
TRINITY_DN20829_c0_g1	hypothetical protein CEUSTIGMA_g3368.t1 [Chlamydomonas eustigma]	2.06358	1.04515	1.55725e-05	0.000169324	yes	up
TRINITY_DN10355_c0_g3	Cell division protein FtsZ-like protein 1, chloroplastic [Auxenochlorella protothecoides]	2.41248	1.27052	3.27122e-11	1.24829e-09	yes	up
TRINITY_DN13801_c0_g1	hypothetical protein CHLNCDRAFT_138129 [Chlorella variabilis]	10.9604	3.45423	6.65505e-06	7.99882e-05	yes	up
TRINITY_DN10267_c0_g2	formate/nitrite transporter [Bathycoccus prasinos]	11.7463	3.55413	3.47186e-05	0.000336979	yes	up
TRINITY_DN14576_c0_g2	hypothetical protein Rsub_06959 [Raphidocelis subcapitata]	2.90344	1.53776	0.000219957	0.00163882	yes	up
TRINITY_DN6499_c1_g1	hypothetical protein CHLNCDRAFT_49810 [Chlorella variabilis]	5.70133	2.5113	0.048889	0.134118	yes	up
TRINITY_DN14576_c0_g5	hypothetical protein CEUSTIGMA_g4707.t1 [Chlamydomonas eustigma]	3.90324	1.96467	0.00817662	0.0330501	yes	up
TRINITY_DN4120_c0_g1	hypothetical protein CHLNCDRAFT_133188 [Chlorella variabilis]	2.99222	1.58122	4.54837e-09	1.16945e-07	yes	up
TRINITY_DN8241_c0_g2	Kinesin KIF19 [Chlorella sorokiniana]	6.41464	2.68137	3.50318e-15	2.34908e-13	yes	up
TRINITY_DN4634_c0_g1	hypothetical protein CHLNCDRAFT_37158 [Chlorella variabilis]	3.10266	1.63351	2.81971e-05	0.000281338	yes	up
TRINITY_DN8328_c0_g3	hypothetical protein CHLRE_01g036800v5 [Chlamydomonas reinhardtii]	7.16104	2.84017	6.56495e-08	1.32478e-06	yes	up
TRINITY_DN13213_c0_g2	phragmoplast orienting kinesin 2 [Chlorella sorokiniana]	6.19943	2.63214	0.0171466	0.0594552	yes	up
TRINITY_DN19668_c0_g1	hypothetical protein CEUSTIGMA_g11791.t1 [Chlamydomonas eustigma]	2.35662	1.23672	0.0117342	0.0441948	yes	up
TRINITY_DN1548_c0_g1	Centromere-associated E [Micractinium conductrix]	2.99116	1.58071	1.37091e-19	1.68471e-17	yes	up
TRINITY_DN9088_c0_g2	Kinesin-II 95 kDa subunit [Micractinium conductrix]	2.22112	1.15129	2.23871e-06	3.0933e-05	yes	up
TRINITY_DN8160_c0_g1	hypothetical protein CEUSTIGMA_g11711.t1 [Chlamydomonas eustigma]	3.76616	1.91309	4.5034e-05	0.000422	yes	up
TRINITY_DN23043_c0_g1	hypothetical protein C2E20_3943 [Micractinium conductrix]	2.25087	1.17048	2.27031e-07	4.07115e-06	yes	up
TRINITY_DN3437_c0_g2	hypothetical protein CHLNCDRAFT_137452 [Chlorella variabilis]	2.13708	1.09564	2.80869e-09	7.4968e-08	yes	up
TRINITY_DN1306_c3_g1	hypothetical protein CHLNCDRAFT_136834 [Chlorella variabilis]	3.91731	1.96986	5.79423e-44	4.59086e-41	yes	up
TRINITY_DN5188_c0_g5	predicted protein [Chlamydomonas reinhardtii]	2.81182	1.49151	1.08971e-05	0.0001242	yes	up
TRINITY_DN15190_c0_g1	kelch domain-containing isoform A [Micractinium conductrix]	2.1215	1.08508	0.0285014	0.0881751	yes	up
TRINITY_DN9514_c0_g1	hypothetical protein CHLNCDRAFT_37095 [Chlorella variabilis]	17.9026	4.1621	4.02532e-07	6.75553e-06	yes	up
TRINITY_DN14179_c0_g1	P-loop containing nucleoside triphosphate hydrolase [Chlorella sorokiniana]	3.24436	1.69793	3.60355e-11	1.36301e-09	yes	up
TRINITY_DN6499_c0_g3	phragmoplast orienting kinesin 2 [Chlorella sorokiniana]	4.62476	2.20938	0.00167391	0.00904814	yes	up
TRINITY_DN14703_c0_g1	hypothetical protein APUTEX25_005820, partial [Auxenochlorella protothecoides]	3.71404	1.89299	2.15427e-17	1.98351e-15	yes	up
TRINITY_DN6393_c0_g9	hypothetical protein CEUSTIGMA_g2847.t1 [Chlamydomonas eustigma]	5.21077	2.3815	3.86725e-39	2.28304e-36	yes	up
TRINITY_DN1284_c0_g2	hypothetical protein CEUSTIGMA_g9003.t1 [Chlamydomonas eustigma]	2.04645	1.03313	0.00888602	0.0352769	yes	up
TRINITY_DN25732_c0_g1	Gamma-tubulin complex component 2 [Micractinium conductrix]	2.74938	1.4591	2.11319e-13	1.12609e-11	yes	up
TRINITY_DN4118_c0_g1	p25-alpha-domain-containing protein [Coccomyxa subellipsoidea C-169]	3.31011	1.72688	6.03466e-14	3.50756e-12	yes	up
TRINITY_DN13942_c0_g2	methionine synthase [Klebsormidium nitens]	38.3151	5.25984	1.11557e-07	2.12848e-06	yes	up
TRINITY_DN303_c0_g1	cobalamin-independent methionine synthase [Coccomyxa subellipsoidea C-169]	2.09112	1.06428	1.54386e-15	1.11469e-13	yes	up
TRINITY_DN21532_c0_g1	hypothetical protein CHLNCDRAFT_145140 [Chlorella variabilis]	2.62412	1.39184	3.08943e-10	9.84303e-09	yes	up
TRINITY_DN25831_c0_g1	multicopper oxidase [Chlorella sorokiniana]	2.44274	1.28852	6.06203e-07	9.81267e-06	yes	up
TRINITY_DN5694_c0_g1	putative copper-transporting ATPase HMA5 [Micractinium conductrix]	2.31569	1.21144	3.14224e-10	1.00007e-08	yes	up
TRINITY_DN8906_c0_g1	hypothetical protein GPECTOR_4g722 [Gonium pectorale]	2.47713	1.30867	4.32492e-05	0.000407685	yes	up
TRINITY_DN6194_c0_g1	hypothetical protein VOLCADRAFT_64450 [Volvox carteri f. nagariensis]	5.61162	2.48842	0.000104684	0.000868988	yes	up
TRINITY_DN6194_c0_g3	heavy metal transporting ATPase [Chlamydomonas reinhardtii]	3.44524	1.78461	0.0157993	0.0559254	yes	up
TRINITY_DN4333_c0_g3	hypothetical protein C2E20_3077 [Micractinium conductrix]	4.77599	2.2558	5.20735e-34	2.14771e-31	yes	up
TRINITY_DN9559_c0_g2	hypothetical protein CEUSTIGMA_g182.t1 [Chlamydomonas eustigma]	3.69422	1.88527	4.8308e-05	0.000447464	yes	up
TRINITY_DN12327_c0_g2	50S ribosomal protein L1 [Bathycoccus prasinos]	31.1689	4.96204	0.00523957	0.0229559	yes	up
TRINITY_DN833_c2_g6	hypothetical protein GPECTOR_3g179 [Gonium pectorale]	2.13631	1.09512	0.00419112	0.0191076	yes	up
TRINITY_DN2951_c0_g2	hypothetical protein CEUSTIGMA_g6906.t1 [Chlamydomonas eustigma]	2.35099	1.23327	9.23426e-11	3.22161e-09	yes	up
TRINITY_DN4716_c0_g2	hypothetical protein CEUSTIGMA_g8186.t1 [Chlamydomonas eustigma]	2.2228	1.15238	0.00602208	0.0257729	yes	up
TRINITY_DN6800_c0_g1	DNA (cytosine-5)-methyltransferase 1-like [Chlorella sorokiniana]	5.38166	2.42805	1.81931e-44	1.52155e-41	yes	up
TRINITY_DN16009_c0_g1	hypothetical protein MNEG_3027 [Monoraphidium neglectum]	2.4406	1.28724	0.0449269	0.125782	yes	up
TRINITY_DN9319_c0_g1	hypothetical protein CEUSTIGMA_g498.t1 [Chlamydomonas eustigma]	2.03188	1.02282	1.2204e-13	6.76684e-12	yes	up
TRINITY_DN17866_c0_g1	hypothetical protein GPECTOR_1g295 [Gonium pectorale]	2.22444	1.15344	1.58871e-05	0.000172371	yes	up
TRINITY_DN6302_c0_g1	hypothetical protein CEUSTIGMA_g3318.t1 [Chlamydomonas eustigma]	2.44725	1.29116	0.0455145	0.127073	yes	up
TRINITY_DN1477_c0_g1	hypothetical protein KFL_002120120 [Klebsormidium nitens]	2.55421	1.35288	1.25637e-12	5.97582e-11	yes	up
TRINITY_DN16814_c0_g1	predicted protein, partial [Chlamydomonas reinhardtii]	2.56405	1.35842	2.10056e-06	2.93202e-05	yes	up
TRINITY_DN3128_c0_g1	alternative oxidase [Micractinium conductrix]	2.03647	1.02607	1.32411e-14	8.32281e-13	yes	up
TRINITY_DN638_c0_g1	hypothetical protein CEUSTIGMA_g8425.t1 [Chlamydomonas eustigma]	2.08334	1.0589	1.22349e-06	1.82181e-05	yes	up
TRINITY_DN54_c0_g3	phosphatidylinositol N-acetylglucosaminyltransferase gpi3 subunit-like isoform X5 [Chlorella sorokiniana]	18.437	4.20453	1.25885e-26	3.18499e-24	yes	up
TRINITY_DN11233_c0_g2	hypothetical protein GPECTOR_226g495 [Gonium pectorale]	2.12917	1.09029	0.00382588	0.0177707	yes	up
TRINITY_DN5710_c0_g4	hypothetical protein CEUSTIGMA_g7285.t1 [Chlamydomonas eustigma]	2.02507	1.01797	3.5228e-11	1.33751e-09	yes	up
TRINITY_DN1010_c0_g1	expressed protein [Chlorella variabilis]	2.14424	1.10047	1.97319e-08	4.49725e-07	yes	up
TRINITY_DN2435_c0_g1	hypothetical protein CHLNCDRAFT_59718 [Chlorella variabilis]	2.28145	1.18995	4.27414e-13	2.14119e-11	yes	up
TRINITY_DN8877_c0_g1	DNA polymerase alpha catalytic subunit [Micractinium conductrix]	6.69028	2.74207	1.16653e-40	7.80487e-38	yes	up
TRINITY_DN2444_c0_g1	hypothetical protein H632_c3057p0, partial [Helicosporidium sp. ATCC 50920]	3.78287	1.91948	8.00681e-22	1.22994e-19	yes	up
TRINITY_DN12226_c0_g1	hypothetical protein H632_c3057p0, partial [Helicosporidium sp. ATCC 50920]	13.0105	3.7016	0.0459128	0.127947	yes	up
TRINITY_DN1342_c0_g1	hypothetical protein CHLNCDRAFT_134836 [Chlorella variabilis]	2.99249	1.58135	1.00222e-23	1.76461e-21	yes	up
TRINITY_DN9253_c0_g1	solanesyl diphosphate synthase [Chlamydomonas reinhardtii]	2.04036	1.02883	8.5926e-09	2.10673e-07	yes	up
TRINITY_DN16126_c0_g1	hypothetical protein Rsub_09643 [Raphidocelis subcapitata]	2.36215	1.2401	0.00368872	0.017248	yes	up
TRINITY_DN26677_c0_g1	hypothetical protein CEUSTIGMA_g1212.t1 [Chlamydomonas eustigma]	2.19067	1.13137	5.19914e-09	1.32098e-07	yes	up
TRINITY_DN7565_c0_g1	mitogen-activated kinase 5 [Chlorella sorokiniana]	2.68334	1.42403	2.2061e-12	1.01561e-10	yes	up
TRINITY_DN4852_c0_g3	hypothetical protein CEUSTIGMA_g10280.t1 [Chlamydomonas eustigma]	2.48015	1.31042	0.00477238	0.0212901	yes	up
TRINITY_DN5557_c0_g4	hypothetical protein CEUSTIGMA_g8765.t1 [Chlamydomonas eustigma]	2.56293	1.3578	1.168e-05	0.000131956	yes	up
TRINITY_DN12770_c0_g1	Quino amine beta chain-like RIC1-like guanyl-nucleotide exchange factor [Micractinium conductrix]	2.00398	1.00287	0.00774511	0.0316018	yes	up
TRINITY_DN2034_c0_g2	hypothetical protein CEUSTIGMA_g5579.t1 [Chlamydomonas eustigma]	2.42939	1.2806	3.6162e-08	7.75867e-07	yes	up
TRINITY_DN244_c0_g1	Alpha-soluble NSF attachment 2 [Micractinium conductrix]	2.57197	1.36287	1.18248e-28	3.63286e-26	yes	up
TRINITY_DN8434_c0_g1	riboflavin biosynthesis chloroplastic-like [Micractinium conductrix]	2.04164	1.02973	0.0246136	0.0788622	yes	up
TRINITY_DN3157_c0_g9	COP-II coat subunit [Chlamydomonas reinhardtii]	2.41677	1.27308	0.00696666	0.0290114	yes	up
TRINITY_DN24090_c0_g1	hypothetical protein CEUSTIGMA_g390.t1 [Chlamydomonas eustigma]	2.12409	1.08684	0.000203842	0.0015347	yes	up
TRINITY_DN10612_c0_g4	cell division protein FTSH (plastid) [Volvox africanus]	5.21732	2.38331	6.86584e-05	0.00060603	yes	up
TRINITY_DN2775_c0_g1	expressed methyltransferase [Micractinium conductrix]	2.33156	1.2213	3.24201e-10	1.02965e-08	yes	up
TRINITY_DN12912_c1_g1	hypothetical protein CEUSTIGMA_g3686.t1 [Chlamydomonas eustigma]	3.80236	1.92689	0.00223105	0.011422	yes	up
TRINITY_DN24579_c0_g1	hypothetical protein CEUSTIGMA_g7201.t1 [Chlamydomonas eustigma]	2.23036	1.15728	1.2317e-05	0.000138167	yes	up
TRINITY_DN6909_c0_g3	hypothetical protein CHLRE_02g084550v5 [Chlamydomonas reinhardtii]	2.07016	1.04974	0.00398088	0.0183351	yes	up
TRINITY_DN1816_c0_g2	fructose-bisphosphate cytoplasmic isozyme [Chlorella sorokiniana]	35.9157	5.16654	0.00033133	0.00232479	yes	up
TRINITY_DN7012_c0_g1	hypothetical protein TSOC_010722 [Tetrabaena socialis]	2.05725	1.04072	0.0181532	0.0622359	yes	up
TRINITY_DN12434_c0_g1	hypothetical protein GPECTOR_36g86 [Gonium pectorale]	2.15215	1.10578	1.48728e-08	3.49018e-07	yes	up
TRINITY_DN4_c0_g4	glucose-1-phosphate adenylyltransferase large subunit chloroplastic amyloplastic [Micractinium conductrix]	2.27171	1.18378	6.50668e-11	2.35178e-09	yes	up
TRINITY_DN24286_c0_g1	glucose-1-phosphate adenylyltransferase [Micractinium conductrix]	2.18132	1.1252	1.24659e-10	4.25536e-09	yes	up
TRINITY_DN4662_c0_g6	hypothetical protein CEUSTIGMA_g11437.t1 [Chlamydomonas eustigma]	2.07314	1.05182	0.00354417	0.0166914	yes	up
TRINITY_DN9184_c1_g1	hypothetical protein CEUSTIGMA_g3395.t1 [Chlamydomonas eustigma]	2.01299	1.00934	4.0726e-12	1.79528e-10	yes	up
TRINITY_DN6479_c0_g1	hypothetical protein CEUSTIGMA_g10033.t1 [Chlamydomonas eustigma]	2.56048	1.35642	1.6588e-13	8.99877e-12	yes	up
TRINITY_DN7770_c0_g1	hypothetical protein CHLRE_06g262100v5 [Chlamydomonas reinhardtii]	2.99618	1.58312	7.1518e-17	6.22331e-15	yes	up
TRINITY_DN21092_c0_g1	hypothetical protein VOLCADRAFT_102653 [Volvox carteri f. nagariensis]	2.63604	1.39837	5.37388e-10	1.6493e-08	yes	up
TRINITY_DN9851_c0_g2	hypothetical protein GPECTOR_20g539 [Gonium pectorale]	42.7514	5.4179	0.00092788	0.00552544	yes	up
TRINITY_DN14332_c0_g1	glyceraldehyde-3-phosphate dehydrogenase [Micractinium conductrix]	3.81343	1.93109	2.31455e-07	4.1427e-06	yes	up
TRINITY_DN3426_c0_g8	hypothetical protein CEUSTIGMA_g4357.t1 [Chlamydomonas eustigma]	2.02228	1.01599	0.0456451	0.127355	yes	up
TRINITY_DN3252_c1_g1	hypothetical protein APUTEX25_002544 [Auxenochlorella protothecoides]	3.70359	1.88892	2.59319e-25	5.65767e-23	yes	up
TRINITY_DN4015_c0_g4	hypothetical protein GPECTOR_11g330 [Gonium pectorale]	2.27731	1.18733	0.00118671	0.00680041	yes	up
TRINITY_DN24366_c0_g1	hypothetical protein VOLCADRAFT_69480 [Volvox carteri f. nagariensis]	2.05697	1.04052	1.89156e-05	0.000199829	yes	up
TRINITY_DN3559_c0_g1	Acyl-[acyl-carrier] desaturase chloroplastic [Chlorella sorokiniana]	3.00328	1.58654	1.33469e-11	5.41317e-10	yes	up
TRINITY_DN6110_c1_g1	very-long-chain (3R)-3-hydroxyacyl- dehydratase [Raphidocelis subcapitata]	2.03071	1.02198	0.00411843	0.0188475	yes	up
TRINITY_DN6989_c0_g1	hypothetical protein CHLNCDRAFT_145345 [Chlorella variabilis]	2.46809	1.3034	8.98813e-19	9.91263e-17	yes	up
TRINITY_DN6168_c0_g5	aldehyde dehydrogenase [Chlamydomonas reinhardtii]	8.9087	3.15521	0.000129316	0.00104336	yes	up
TRINITY_DN22205_c0_g1	3-ketoacyl- synthase 11 isoform A [Chlorella sorokiniana]	2.03513	1.02512	2.32681e-06	3.19597e-05	yes	up
TRINITY_DN22371_c0_g1	beta subunit of acetyl-CoA carboxylase carboxytransferase (chloroplast) [Dicloster acuatus]	5.79428	2.53463	0.000236901	0.00174069	yes	up
TRINITY_DN22832_c0_g1	hypothetical protein CHLRE_01g039400v5 [Chlamydomonas reinhardtii]	2.13667	1.09536	5.27901e-10	1.62516e-08	yes	up
TRINITY_DN10246_c0_g1	hypothetical protein CHLRE_16g695100v5 [Chlamydomonas reinhardtii]	2.45061	1.29314	1.08774e-12	5.23157e-11	yes	up
TRINITY_DN22472_c0_g1	hypothetical protein GPECTOR_11g51 [Gonium pectorale]	2.07028	1.04983	8.91881e-09	2.18315e-07	yes	up
TRINITY_DN1682_c1_g3	ACOX [Dunaliella tertiolecta]	2.27279	1.18447	3.23712e-10	1.02918e-08	yes	up
TRINITY_DN14713_c0_g3	hypothetical protein CEUSTIGMA_g7661.t1 [Chlamydomonas eustigma]	4.3212	2.11143	2.31269e-10	7.5195e-09	yes	up
TRINITY_DN23349_c0_g1	hypothetical protein CEUSTIGMA_g12148.t1 [Chlamydomonas eustigma]	2.39179	1.25809	5.18463e-05	0.000475621	yes	up
TRINITY_DN18829_c0_g1	AAA-ATPase of VPS4/SKD1 family [Chlamydomonas reinhardtii]	2.25438	1.17273	6.46675e-11	2.34015e-09	yes	up
TRINITY_DN24568_c0_g1	Serine threonine-kinase endoribonuclease IRE1 [Micractinium conductrix]	2.22825	1.15591	3.09934e-08	6.77669e-07	yes	up
TRINITY_DN12537_c0_g2	hypothetical protein Rsub_01349 [Raphidocelis subcapitata]	2.31173	1.20897	5.46741e-08	1.12134e-06	yes	up
TRINITY_DN673_c1_g5	Ubiquitin thioesterase OTU1 isoform B [Micractinium conductrix]	2.40785	1.26774	2.4171e-06	3.30791e-05	yes	up
TRINITY_DN16102_c0_g2	hypothetical protein CEUSTIGMA_g5589.t1 [Chlamydomonas eustigma]	2.41092	1.26958	0.00268472	0.0132867	yes	up
TRINITY_DN3502_c0_g2	cytochrome c oxidase subunit 1 (mitochondrion) [Chlorella variabilis]	3.35988	1.74841	4.62046e-05	0.000431224	yes	up
TRINITY_DN13113_c0_g1	NADH-cytochrome b5 reductase 1 [Auxenochlorella protothecoides]	2.03361	1.02404	0.000598601	0.00382815	yes	up
TRINITY_DN3770_c0_g8	hypothetical protein CEUSTIGMA_g9229.t1 [Chlamydomonas eustigma]	2.10152	1.07143	0.0001789	0.00137161	yes	up
TRINITY_DN23203_c0_g1	hypothetical protein GPECTOR_240g576 [Gonium pectorale]	5.71836	2.5156	5.42019e-25	1.13327e-22	yes	up
TRINITY_DN16643_c0_g1	P-loop containing nucleoside triphosphate hydrolase protein, partial [Ostreococcus tauri]	21.9715	4.45756	0.0389848	0.112579	yes	up
TRINITY_DN557_c3_g1	hypothetical protein CEUSTIGMA_g11285.t1 [Chlamydomonas eustigma]	3.64568	1.86619	1.45939e-07	2.71398e-06	yes	up
TRINITY_DN18198_c0_g1	hypothetical protein CHLNCDRAFT_138203 [Chlorella variabilis]	2.03459	1.02474	0.0144315	0.0519988	yes	up
TRINITY_DN5440_c0_g1	Sodium hydrogen exchanger 7 [Micractinium conductrix]	2.29774	1.20021	7.94134e-06	9.32519e-05	yes	up
TRINITY_DN4822_c0_g1	Structural maintenance of chromosomes 5 [Micractinium conductrix]	2.37379	1.24719	1.9026e-13	1.01928e-11	yes	up
TRINITY_DN208_c1_g1	DNA replication licensing factor MCM3 [Micractinium conductrix]	4.64739	2.21642	5.13358e-27	1.38002e-24	yes	up
TRINITY_DN5582_c0_g1	DNA replication licensing factor MCM7 [Chlorella sorokiniana]	2.83579	1.50375	1.24818e-15	9.25618e-14	yes	up
TRINITY_DN2657_c0_g1	DNA replication licensing factor Mcm6 [Chlorella sorokiniana]	2.9045	1.53829	5.12552e-20	6.56678e-18	yes	up
TRINITY_DN5192_c0_g1	uroporphyrinogen decarboxylase [Chlorella sorokiniana]	2.72687	1.44725	1.014e-10	3.51724e-09	yes	up
TRINITY_DN15264_c0_g1	Tetratricopeptide repeat-like superfamily isoform [Chlorella sorokiniana]	2.15401	1.10702	0.000121313	0.000987958	yes	up
TRINITY_DN20909_c0_g1	Tetratricopeptide repeat-like superfamily isoform [Chlorella sorokiniana]	2.30961	1.20765	6.34026e-05	0.00056544	yes	up
TRINITY_DN11553_c0_g4	hypothetical protein CHLNCDRAFT_139170 [Chlorella variabilis]	6.29494	2.65419	0.0156484	0.0554771	yes	up
TRINITY_DN929_c0_g4	IAA-amino acid hydrolase ILR1-like 3 [Micractinium conductrix]	3.45627	1.78922	1.58467e-06	2.29602e-05	yes	up
TRINITY_DN5345_c0_g5	hypothetical protein CHLNCDRAFT_49769 [Chlorella variabilis]	4.21571	2.07578	2.93371e-08	6.44261e-07	yes	up
TRINITY_DN24922_c0_g1	DNA replication factor C complex subunit 2 [Chlamydomonas reinhardtii]	2.26161	1.17735	0.00346902	0.0164274	yes	up
TRINITY_DN18003_c0_g1	DNA primase small subunit [Chlorella sorokiniana]	4.47674	2.16245	2.41179e-25	5.3003e-23	yes	up
TRINITY_DN7696_c0_g1	DNA primase small subunit [Chlorella sorokiniana]	4.16451	2.05815	7.03715e-15	4.60596e-13	yes	up
TRINITY_DN8514_c0_g1	ribonuclease HII [Micractinium conductrix]	5.1593	2.36717	1.7635e-12	8.25746e-11	yes	up
TRINITY_DN4330_c1_g3	DNA replication ATP-dependent helicase dna2 [Chlorella sorokiniana]	3.27734	1.71252	2.64479e-14	1.60867e-12	yes	up
TRINITY_DN22593_c0_g1	DNA replication licensing factor MCM4 [Chlorella sorokiniana]	3.99847	1.99945	3.68029e-30	1.21765e-27	yes	up
TRINITY_DN5704_c0_g1	Drug Metabolite transporter superfamily [Chlorella sorokiniana]	4.11551	2.04107	1.30635e-07	2.44904e-06	yes	up
TRINITY_DN10777_c0_g1	mitotic checkpoint serine threonine- kinase BUB1 [Chlorella sorokiniana]	2.03064	1.02193	0.00011085	0.000913626	yes	up
TRINITY_DN1090_c0_g1	DNA polymerase epsilon subunit 2 [Micractinium conductrix]	3.36101	1.7489	7.70929e-23	1.28238e-20	yes	up
TRINITY_DN9655_c0_g1	Origin recognition complex subunit 4 [Chlorella sorokiniana]	6.77687	2.76062	9.32233e-24	1.65114e-21	yes	up
TRINITY_DN12186_c0_g1	Cell division control 6 [Chlorella sorokiniana]	5.97136	2.57806	1.03749e-09	3.02681e-08	yes	up
TRINITY_DN12603_c0_g1	hypothetical protein CHLNCDRAFT_137796 [Chlorella variabilis]	3.58626	1.84248	2.96652e-13	1.52957e-11	yes	up
TRINITY_DN3804_c0_g1	TIMELESS-interacting -like [Chlorella sorokiniana]	3.05122	1.60939	3.64034e-10	1.14648e-08	yes	up
TRINITY_DN10465_c0_g1	Fanconi anemia group M isoform X3 [Chlorella sorokiniana]	4.58914	2.19822	1.85587e-12	8.63625e-11	yes	up
TRINITY_DN5495_c0_g2	autophagy-related 18h-like isoform X1 [Chlorella sorokiniana]	2.27774	1.18761	2.16458e-06	3.00605e-05	yes	up
TRINITY_DN4889_c0_g5	predicted protein [Chlamydomonas reinhardtii]	2.3909	1.25755	0.00265806	0.0131771	yes	up
TRINITY_DN8949_c0_g4	DNA repair XRCC3-like protein [Chlorella sorokiniana]	21.4191	4.42083	0.0414926	0.118111	yes	up
TRINITY_DN5107_c0_g5	Protease 2 [Tetrabaena socialis]	2.01102	1.00793	0.0109455	0.04172	yes	up
TRINITY_DN1048_c0_g12	hypothetical protein Rsub_12841 [Raphidocelis subcapitata]	4.01049	2.00378	0.0304316	0.0927049	yes	up
TRINITY_DN6084_c0_g2	ATP-dependent DNA helicase PIF1 [Tetrabaena socialis]	2.61972	1.38941	0.00163914	0.00890175	yes	up
TRINITY_DN4131_c0_g2	mismatch repair endonuclease PMS2 [Chlorella sorokiniana]	2.43322	1.28287	0.00860264	0.0344014	yes	up
TRINITY_DN10239_c0_g1	ATP-dependent DNA helicase Q-like 4A [Auxenochlorella protothecoides]	3.91835	1.97025	3.65633e-08	7.82407e-07	yes	up
TRINITY_DN6600_c0_g1	ATP-dependent DNA helicase Q-like 4A isoform X3 [Chlorella sorokiniana]	5.3345	2.41535	1.35089e-19	1.66692e-17	yes	up
TRINITY_DN18114_c0_g1	ATP-dependent DNA helicase Q-like 1 [Micractinium conductrix]	2.18809	1.12967	3.41661e-06	4.47833e-05	yes	up
TRINITY_DN5985_c0_g3	hypothetical protein CBR_g21263 [Chara braunii]	7.07303	2.82233	0.0364845	0.106707	yes	up
TRINITY_DN10467_c0_g1	hypothetical protein KFL_011450010, partial [Klebsormidium nitens]	2.15036	1.10458	0.0271422	0.0849301	yes	up
TRINITY_DN9249_c0_g1	Retrovirus-related Pol polyprotein from transposon [Tetrabaena socialis]	2.11908	1.08344	0.00089431	0.00535413	yes	up
TRINITY_DN6338_c0_g4	hypothetical protein GPECTOR_5000g1276 [Gonium pectorale]	3.79356	1.92355	0.0234383	0.0759532	yes	up
TRINITY_DN6337_c0_g1	Retrovirus-related Pol poly from transposon TNT 1-94 isoform A [Chlorella sorokiniana]	7.27497	2.86294	1.05022e-10	3.62198e-09	yes	up
TRINITY_DN411_c0_g1	Gag-Pol poly [Micractinium conductrix]	8.81717	3.14032	8.40935e-58	1.26594e-54	yes	up
TRINITY_DN7892_c0_g1	gag,protease,endonuclease, reverse transcriptase,RNaseH [Volvox carteri f. nagariensis]	6.25941	2.64603	0.000284028	0.0020351	yes	up
TRINITY_DN7534_c0_g3	hypothetical protein GPECTOR_1291g539 [Gonium pectorale]	5.88357	2.55669	5.23496e-08	1.08177e-06	yes	up
TRINITY_DN3236_c0_g12	myosin-1-like isoform X1 [Chlorella sorokiniana]	2.40923	1.26857	1.22004e-07	2.30879e-06	yes	up
TRINITY_DN4217_c0_g6	hypothetical protein CHLRE_09g398141v5 [Chlamydomonas reinhardtii]	2.52372	1.33555	0.0201263	0.0673741	yes	up
TRINITY_DN18232_c0_g1	hypothetical protein CEUSTIGMA_g4677.t1 [Chlamydomonas eustigma]	2.08745	1.06174	0.000338409	0.0023651	yes	up
TRINITY_DN7887_c0_g1	endoplasmic reticulum-Golgi intermediate compartment 3 [Micractinium conductrix]	3.07849	1.62222	4.00542e-25	8.54698e-23	yes	up
TRINITY_DN4626_c0_g1	hypothetical protein CEUSTIGMA_g13016.t1 [Chlamydomonas eustigma]	2.13368	1.09334	0.000453186	0.00303684	yes	up
TRINITY_DN4636_c0_g1	DNA/RNA polymerase superfamily protein with reverse transcriptase domain [Klebsormidium nitens]	2.55394	1.35273	0.0494323	0.135288	yes	up
TRINITY_DN6432_c0_g4	hypothetical protein [Dunaliella viridis]	2.71814	1.44262	0.0125874	0.0466293	yes	up
TRINITY_DN4444_c0_g2	flagellar associated [Micractinium conductrix]	3.24719	1.69919	0.0376434	0.109377	yes	up
TRINITY_DN8084_c0_g1	Breast cancer type 2 susceptibility [Chlorella sorokiniana]	7.72616	2.94975	2.44898e-32	8.99195e-30	yes	up
TRINITY_DN10382_c0_g3	hypothetical protein CHLRE_06g272400v5 [Chlamydomonas reinhardtii]	2.67358	1.41877	0.0106898	0.041015	yes	up
TRINITY_DN24829_c0_g1	regulatory component of sensory transduction system [Chlorokybus atmophyticus]	21.2281	4.4079	0.00714953	0.029616	yes	up
TRINITY_DN7925_c0_g2	hypothetical protein CEUSTIGMA_g11414.t1 [Chlamydomonas eustigma]	2.20645	1.14173	0.000693242	0.00432045	yes	up
TRINITY_DN8855_c0_g1	predicted protein [Chlamydomonas reinhardtii]	2.52561	1.33663	1.72853e-19	2.0817e-17	yes	up
TRINITY_DN6052_c0_g4	Ribonucleoside-diphosphate reductase large subunit [Chlorella sorokiniana]	2.62671	1.39326	9.87403e-16	7.46953e-14	yes	up
TRINITY_DN23014_c0_g1	hypothetical protein GPECTOR_22g833 [Gonium pectorale]	2.05844	1.04155	0.00109928	0.00636361	yes	up
TRINITY_DN1234_c0_g1	cystathionine beta-lyase [Chlorella sorokiniana]	5.50244	2.46007	2.19404e-11	8.63505e-10	yes	up
TRINITY_DN6459_c0_g3	cytochrome c biogenesis protein [Parachlorella kessleri]	6.79815	2.76514	1.58234e-07	2.92635e-06	yes	up
TRINITY_DN25922_c0_g1	thioredoxin chloroplastic [Chlorella sorokiniana]	2.02934	1.02101	1.37125e-06	2.01787e-05	yes	up
TRINITY_DN5405_c0_g2	Serine acetyltransferase 5 [Tetrabaena socialis]	2.16995	1.11766	4.13942e-06	5.30113e-05	yes	up
TRINITY_DN24489_c0_g1	Two-component transcriptional regulator, LuxR family, partial [uncultured Streptophyta]	7.4346	2.89426	0.0332698	0.0994528	yes	up
TRINITY_DN6194_c0_g2	hypothetical protein CEUSTIGMA_g2914.t1 [Chlamydomonas eustigma]	3.76362	1.91212	7.77588e-05	0.000674492	yes	up
TRINITY_DN3463_c0_g4	hypothetical protein CEUSTIGMA_g2180.t1 [Chlamydomonas eustigma]	2.16314	1.11313	2.92018e-05	0.00028969	yes	up
TRINITY_DN11987_c1_g3	ATP-dependent RNA helicase DDX1 [Chlorella sorokiniana]	2.31592	1.21159	6.09168e-05	0.000545695	yes	up
TRINITY_DN9602_c0_g2	uroporphyrin III methylase [Micromonas commoda]	6.54869	2.71121	0.0197326	0.0663439	yes	up
TRINITY_DN1223_c0_g9	hypothetical protein CEUSTIGMA_g10918.t1 [Chlamydomonas eustigma]	2.45674	1.29675	1.2925e-07	2.42458e-06	yes	up
TRINITY_DN11215_c1_g1	hypothetical protein CEUSTIGMA_g11896.t1 [Chlamydomonas eustigma]	2.25007	1.16997	0.00211528	0.0109503	yes	up
TRINITY_DN16541_c0_g1	hypothetical protein CEUSTIGMA_g11491.t1 [Chlamydomonas eustigma]	2.1272	1.08896	3.00874e-05	0.000296715	yes	up
TRINITY_DN22641_c0_g1	dynein intermediate chain axonemal isoform A [Chlorella sorokiniana]	5.93161	2.56842	5.47356e-33	2.16839e-30	yes	up
TRINITY_DN6392_c0_g1	hypothetical protein GPECTOR_169g183 [Gonium pectorale]	4.12386	2.044	5.41372e-06	6.6884e-05	yes	up
TRINITY_DN22937_c0_g1	tetrapyrrole-binding protein [Chlamydomonas reinhardtii]	2.69709	1.4314	1.18334e-11	4.8211e-10	yes	up
TRINITY_DN17201_c0_g1	hypothetical protein VOLCADRAFT_81313 [Volvox carteri f. nagariensis]	26.1572	4.70913	0.0143102	0.051667	yes	up
TRINITY_DN36_c1_g2	hypothetical protein CHLRE_02g105550v5 [Chlamydomonas reinhardtii]	4.44695	2.15281	0.0244518	0.0785023	yes	up
TRINITY_DN10497_c0_g1	predicted protein [Chlamydomonas reinhardtii]	2.33013	1.22041	5.55373e-05	0.000503953	yes	up
TRINITY_DN4792_c2_g1	hypothetical protein VOLCADRAFT_117050 [Volvox carteri f. nagariensis]	2.21694	1.14857	2.68648e-05	0.000269795	yes	up
TRINITY_DN25178_c0_g1	putative apyrase 7 [Chlorella sorokiniana]	4.34842	2.12049	0.000111411	0.000917245	yes	up
TRINITY_DN0_c0_g3	magnesium protoporphyrin chelatase [Volvox carteri f. nagariensis]	3.27289	1.71056	1.51271e-34	6.79773e-32	yes	up
TRINITY_DN5159_c2_g5	hypothetical protein GPECTOR_26g582 [Gonium pectorale]	2.23683	1.16146	3.58056e-14	2.15177e-12	yes	up
TRINITY_DN24260_c0_g1	hypothetical protein VOLCADRAFT_72683 [Volvox carteri f. nagariensis]	2.08817	1.06224	7.67033e-10	2.28652e-08	yes	up
TRINITY_DN21295_c0_g1	light-dependent protochlorophyllide reductase [Chlamydomonas reinhardtii]	3.92592	1.97303	1.88416e-18	2.00454e-16	yes	up
TRINITY_DN23906_c0_g1	magnesium chelatase subunit of protochlorophyllide reductase (chloroplast) [Dicloster acuatus]	9.851	3.30027	3.51979e-06	4.59956e-05	yes	up
TRINITY_DN25871_c0_g1	hypothetical protein CEUSTIGMA_g6343.t1 [Chlamydomonas eustigma]	2.22173	1.15168	8.04531e-06	9.43624e-05	yes	up
TRINITY_DN19326_c0_g1	magnesium chelatase subunit I [Chlamydomonas reinhardtii]	2.18761	1.12935	1.8905e-09	5.23155e-08	yes	up
TRINITY_DN8108_c1_g4	photochlorophyllide reductase subunit B [Parachlorella kessleri]	6.18231	2.62815	0.00275523	0.0135771	yes	up
TRINITY_DN4271_c0_g2	chlN gene product (chloroplast) [Dunaliella salina]	3.99576	1.99847	0.000180393	0.0013806	yes	up
TRINITY_DN13596_c0_g2	chlB gene product (chloroplast) [Dunaliella salina]	2.6545	1.40844	0.0399919	0.114718	yes	up
TRINITY_DN9709_c0_g2	hypothetical protein CEUSTIGMA_g4262.t1 [Chlamydomonas eustigma]	2.05313	1.03783	7.08062e-08	1.42027e-06	yes	up
TRINITY_DN8984_c0_g2	chitinase [Chlorella sorokiniana]	9.21434	3.20388	1.17724e-35	5.53816e-33	yes	up
TRINITY_DN17375_c0_g1	hypothetical protein C2E21_0843 [Chlorella sorokiniana]	55.9791	5.80682	2.10242e-05	0.000218652	yes	up
TRINITY_DN5242_c0_g1	hypothetical protein Rsub_10997 [Raphidocelis subcapitata]	2.22989	1.15697	1.13768e-07	2.16657e-06	yes	up
TRINITY_DN19852_c0_g1	DNA polymerase epsilon subunit 3 [Micractinium conductrix]	2.18325	1.12647	1.42838e-05	0.00015684	yes	up
TRINITY_DN23924_c0_g1	hypothetical protein CHLRE_05g232800v5 [Chlamydomonas reinhardtii]	2.26315	1.17833	0.000716746	0.00444834	yes	up
TRINITY_DN547_c0_g1	hypothetical protein CEUSTIGMA_g10649.t1 [Chlamydomonas eustigma]	2.51582	1.33103	1.30032e-17	1.22967e-15	yes	up
TRINITY_DN5940_c0_g1	hypothetical protein GPECTOR_70g480 [Gonium pectorale]	2.17352	1.12004	1.90709e-08	4.36643e-07	yes	up
TRINITY_DN18820_c0_g1	catalase [Volvox carteri f. nagariensis]	2.219	1.15082	0.000563483	0.00219689	yes	up
TRINITY_DN18820_c0_g1	catalase [Volvox carteri f. nagariensis]	3.363	1.7508	0.000863884	0.00519988	yes	up
TRINITY_DN3207_c0_g1	UDP-glucuronic acid decarboxylase 1 [Chlorella sorokiniana]	2.5283	1.33817	2.83663e-10	9.05676e-09	yes	up
TRINITY_DN597_c0_g7	hypothetical protein CEUSTIGMA_g1267.t1 [Chlamydomonas eustigma]	2.55076	1.35092	5.4665e-08	1.12134e-06	yes	up
TRINITY_DN6304_c0_g1	hypothetical protein H632_c37p2 [Helicosporidium sp. ATCC 50920]	2.00361	1.0026	0.000230698	0.00170493	yes	up
TRINITY_DN1497_c0_g1	hypothetical protein CHLNCDRAFT_134673 [Chlorella variabilis]	2.42073	1.27544	1.68083e-09	4.71634e-08	yes	up
TRINITY_DN21486_c0_g1	hypothetical protein CHLRE_01g053750v5 [Chlamydomonas reinhardtii]	2.21041	1.14432	1.26289e-05	0.00014114	yes	up
TRINITY_DN8572_c0_g7	hypothetical protein GPECTOR_17g794 [Gonium pectorale]	2.72725	1.44745	0.028602	0.0884005	yes	up
TRINITY_DN11662_c1_g1	hypothetical protein MNEG_1447 [Monoraphidium neglectum]	2.51067	1.32807	0.00040038	0.00273038	yes	up
TRINITY_DN917_c0_g3	hypothetical protein CEUSTIGMA_g2889.t1 [Chlamydomonas eustigma]	2.67568	1.4199	1.94753e-05	0.000205094	yes	up
TRINITY_DN307_c0_g2	G patch domain-containing TGH-like isoform X1 [Chlorella sorokiniana]	2.09046	1.06382	0.0155942	0.0553277	yes	up
TRINITY_DN9424_c0_g1	hypothetical protein CHLRE_10g453400v5 [Chlamydomonas reinhardtii]	2.63868	1.39982	2.40626e-11	9.37228e-10	yes	up
TRINITY_DN14713_c0_g4	hypothetical protein CHLRE_10g453400v5 [Chlamydomonas reinhardtii]	2.18482	1.12752	0.0216008	0.0711472	yes	up
TRINITY_DN20735_c0_g1	hypothetical protein CHLRE_03g165700v5 [Chlamydomonas reinhardtii]	2.25187	1.17112	1.41439e-07	2.63355e-06	yes	up
TRINITY_DN1938_c0_g3	hypothetical protein CHLNCDRAFT_35601 [Chlorella variabilis]	3.64784	1.86704	1.43241e-32	5.45912e-30	yes	up
TRINITY_DN584_c0_g3	pyruvate decarboxylase [Micractinium conductrix]	3.07983	1.62285	3.60681e-07	6.12486e-06	yes	up
TRINITY_DN278_c0_g1	stage v sporulation s [Micractinium conductrix]	2.11074	1.07775	1.31729e-10	4.48148e-09	yes	up
TRINITY_DN14743_c0_g4	brefeldin A-inhibited guanine nucleotide-exchange 2-like [Micractinium conductrix]	2.27426	1.1854	9.23453e-17	7.85405e-15	yes	up
TRINITY_DN13942_c0_g1	methionine synthase [Klebsormidium nitens]	49.6606	5.63403	0.000497646	0.00328722	yes	up
TRINITY_DN17421_c0_g1	hypothetical protein CHLNCDRAFT_37217 [Chlorella variabilis]	2.00173	1.00125	8.91469e-11	3.1246e-09	yes	up
TRINITY_DN9074_c1_g4	hypothetical protein CBR_g21817 [Chara braunii]	2.39639	1.26086	9.35133e-08	1.81966e-06	yes	up
TRINITY_DN19849_c0_g1	Histone-lysine N-methyltransferase ASHH2 [Micractinium conductrix]	2.30708	1.20607	3.86264e-05	0.000370253	yes	up
TRINITY_DN3546_c0_g1	Queuine tRNA-ribosyltransferase [Micractinium conductrix]	2.28954	1.19506	2.26482e-12	1.03947e-10	yes	up
TRINITY_DN9106_c0_g7	1-cysteine peroxiredoxin [Klebsormidium nitens]	8.65611	3.11372	1.79492e-06	2.55274e-05	yes	up
TRINITY_DN25730_c0_g1	hypothetical protein CEUSTIGMA_g3013.t1 [Chlamydomonas eustigma]	2.99639	1.58322	4.1597e-13	2.08734e-11	yes	up
TRINITY_DN6725_c0_g2	hypothetical protein C2E21_5499 [Chlorella sorokiniana]	2.21078	1.14455	1.75891e-15	1.2639e-13	yes	up
TRINITY_DN8364_c0_g2	hypothetical protein CHLNCDRAFT_48889 [Chlorella variabilis]	7.78103	2.95996	3.8252e-06	4.93865e-05	yes	up
TRINITY_DN14559_c0_g1	FAD-dependent pyridine nucleotide-disulfide oxidoreductase [Monoraphidium neglectum]	21.7634	4.44383	0.0396114	0.113897	yes	up
TRINITY_DN7045_c0_g1	hypothetical protein APUTEX25_001018 [Auxenochlorella protothecoides]	2.32088	1.21467	9.56735e-09	2.32302e-07	yes	up
TRINITY_DN3418_c0_g2	thioredoxin-like protein [Coccomyxa subellipsoidea C-169]	2.15025	1.1045	0.0015945	0.00870645	yes	up
TRINITY_DN4232_c0_g8	hypothetical protein CHLNCDRAFT_144962 [Chlorella variabilis]	2.01262	1.00907	3.07181e-05	0.000301749	yes	up
TRINITY_DN1806_c0_g1	Cyclin-dependent kinase E-1 [Auxenochlorella protothecoides]	2.05482	1.03901	3.55956e-11	1.34976e-09	yes	up
TRINITY_DN23977_c0_g1	eyes absent-like protein 2 [Micractinium conductrix]	3.89113	1.96019	6.39545e-17	5.63024e-15	yes	up
TRINITY_DN96_c0_g6	glutaredoxin-like protein [Chlamydomonas reinhardtii]	2.03534	1.02527	7.22587e-06	8.5682e-05	yes	up
TRINITY_DN25612_c0_g1	thioredoxin-like protein [Volvox carteri f. nagariensis]	2.26281	1.17812	9.84451e-08	1.89513e-06	yes	up
TRINITY_DN7949_c0_g2	Helicase sen1 isoform B [Chlorella sorokiniana]	2.24288	1.16535	1.24685e-07	2.35066e-06	yes	up
TRINITY_DN1442_c0_g1	hypothetical protein CHLRE_02g093500v5 [Chlamydomonas reinhardtii]	2.10922	1.07671	4.37153e-06	5.56164e-05	yes	up
TRINITY_DN7695_c0_g2	ftsH gene product (chloroplast) [Dunaliella salina]	3.75372	1.90832	0.00243779	0.012282	yes	up
TRINITY_DN19032_c0_g1	cell division protein [Parachlorella kessleri]	5.74069	2.52122	0.00300754	0.0146168	yes	up
TRINITY_DN19179_c0_g1	cell division protein [Parachlorella kessleri]	8.20671	3.0368	7.4039e-07	1.1751e-05	yes	up
TRINITY_DN19009_c0_g1	septum-site determining protein [Parachlorella kessleri]	5.86157	2.55129	0.00249471	0.0125184	yes	up
TRINITY_DN12635_c0_g1	Cell division control 6 [Chlorella sorokiniana]	5.44376	2.4446	5.05321e-19	5.69821e-17	yes	up
TRINITY_DN4447_c0_g1	hypothetical protein C2E20_8853 [Micractinium conductrix]	2.0045	1.00324	1.14867e-06	1.72232e-05	yes	up
TRINITY_DN14817_c0_g1	hypothetical protein CEUSTIGMA_g10504.t1 [Chlamydomonas eustigma]	2.36097	1.23938	7.14824e-07	1.13873e-05	yes	up
TRINITY_DN3294_c0_g2	hypothetical protein GPECTOR_54g235 [Gonium pectorale]	2.64403	1.40274	1.19825e-20	1.63986e-18	yes	up
TRINITY_DN8649_c0_g2	phytoene synthase [Micractinium conductrix]	2.43029	1.28113	8.48051e-17	7.23318e-15	yes	up
TRINITY_DN13168_c0_g1	carotenoid cleavage dioxygenase [Dunaliella salina]	2.90334	1.53771	7.70568e-10	2.29478e-08	yes	up
TRINITY_DN7654_c0_g2	hypothetical protein CHLNCDRAFT_134284 [Chlorella variabilis]	5.59972	2.48535	1.30089e-17	1.22967e-15	yes	up
TRINITY_DN3876_c0_g2	UDP-N-acetylglucosamine transporter-like [Micractinium conductrix]	2.11621	1.08148	8.3146e-07	1.29842e-05	yes	up
TRINITY_DN6270_c0_g7	hypothetical protein CHLNCDRAFT_31039 [Chlorella variabilis]	2.17865	1.12343	2.78199e-15	1.89933e-13	yes	up
TRINITY_DN22839_c0_g1	dehydroascorbate reductase [Chlamydomonas reinhardtii]	3.37166	1.75346	2.36248e-27	6.52563e-25	yes	up
TRINITY_DN835_c0_g2	Acyl-coenzyme A thioesterase 11 [Micractinium conductrix]	2.13659	1.09531	1.50036e-11	6.04721e-10	yes	up
TRINITY_DN4126_c0_g2	phosphoglucomutase [Micractinium conductrix]	2.52401	1.33572	6.0801e-10	1.84536e-08	yes	up
TRINITY_DN5197_c0_g1	hypothetical protein CHLNCDRAFT_140952 [Chlorella variabilis]	3.26609	1.70756	2.24871e-27	6.2689e-25	yes	up
TRINITY_DN18964_c0_g1	hypothetical protein CHLNCDRAFT_58681 [Chlorella variabilis]	5.6026	2.4861	5.11065e-06	6.36095e-05	yes	up
TRINITY_DN6332_c0_g1	glucose-6-phosphate 1-epimerase [Chlorella sorokiniana]	2.12909	1.09024	0.000450729	0.00302172	yes	up
TRINITY_DN2078_c0_g1	mitochondrial sodium hydrogen exchanger 9B2-like [Micractinium conductrix]	2.33841	1.22553	2.56903e-15	1.78222e-13	yes	up
TRINITY_DN4126_c1_g1	phosphoglucomutase [Chlorella sorokiniana]	2.24829	1.16883	3.13143e-15	2.1092e-13	yes	up
TRINITY_DN3909_c0_g1	magnesium-translocating P-type ATPase [Micractinium conductrix]	2.30323	1.20366	9.47774e-08	1.83337e-06	yes	up
TRINITY_DN2756_c0_g1	hypothetical protein CHLNCDRAFT_135020 [Chlorella variabilis]	2.85963	1.51583	1.1846e-22	1.93837e-20	yes	up
TRINITY_DN9230_c0_g1	serine threonine- kinase receptor R831 [Chlorella sorokiniana]	2.74232	1.4554	2.28008e-15	1.6002e-13	yes	up
TRINITY_DN6874_c0_g1	hypothetical protein APUTEX25_001639 [Auxenochlorella protothecoides]	3.69265	1.88466	1.73664e-05	0.00018614	yes	up
TRINITY_DN10960_c0_g2	Radial spoke head 10-like protein B [Auxenochlorella protothecoides]	3.14804	1.65445	0.00466423	0.0208881	yes	up
TRINITY_DN143_c0_g1	(1-3)-beta-glucanase [Chlorella sorokiniana]	3.98684	1.99524	1.75292e-53	2.19904e-50	yes	up
TRINITY_DN16172_c0_g1	serine protease ABC transporter B family tagA [Raphidocelis subcapitata]	2.0098	1.00705	0.00582661	0.0250683	yes	up
TRINITY_DN574_c0_g1	Serine protease ABC transporter B family tagA [Chlorella sorokiniana]	2.13883	1.09682	6.2753e-13	3.10751e-11	yes	up
TRINITY_DN15344_c0_g1	serine protease ABC transporter [Raphidocelis subcapitata]	3.54633	1.82633	9.32065e-14	5.23556e-12	yes	up
TRINITY_DN511_c0_g1	hypothetical protein APUTEX25_003082, partial [Auxenochlorella protothecoides]	6.36869	2.671	9.23163e-68	1.85297e-64	yes	up
TRINITY_DN5040_c0_g1	hypothetical protein CEUSTIGMA_g3412.t1 [Chlamydomonas eustigma]	2.09829	1.06921	1.81009e-09	5.04145e-08	yes	up
TRINITY_DN24937_c0_g1	hypothetical protein Rsub_08389 [Raphidocelis subcapitata]	2.32345	1.21627	1.05293e-05	0.000120309	yes	up
TRINITY_DN20772_c0_g1	hypothetical protein COCSUDRAFT_32295 [Coccomyxa subellipsoidea C-169]	2.95377	1.56256	4.37509e-09	1.12972e-07	yes	up
TRINITY_DN14716_c0_g1	auxin efflux carrier family [Chlorella sorokiniana]	2.23464	1.16004	1.20833e-05	0.000135799	yes	up
TRINITY_DN9353_c0_g1	cation efflux protein [Coccomyxa subellipsoidea C-169]	162.121	7.34093	3.00718e-08	6.58474e-07	yes	up
TRINITY_DN2701_c0_g2	tRNA pseudouridine(38 39) synthase isoform X1 [Chlorella sorokiniana]	2.55907	1.35562	7.28706e-24	1.31377e-21	yes	up
TRINITY_DN631_c0_g2	serine threonine-kinase [Micractinium conductrix]	2.84152	1.50666	7.05827e-26	1.64737e-23	yes	up
TRINITY_DN2418_c0_g1	phosphoglucomutase PGM3 [Micractinium conductrix]	2.15762	1.10944	1.5872e-10	5.32153e-09	yes	up
TRINITY_DN19362_c0_g1	hypothetical protein COCSUDRAFT_62615 [Coccomyxa subellipsoidea C-169]	3.39737	1.76442	1.44363e-34	6.58557e-32	yes	up
TRINITY_DN6261_c1_g6	naphthoate synthase [Chlorella sorokiniana]	2.02379	1.01706	3.61868e-17	3.2718e-15	yes	up
TRINITY_DN1381_c0_g3	coproporphyrinogen III oxidase [Micractinium conductrix]	2.04016	1.02868	1.93668e-10	6.35872e-09	yes	up
TRINITY_DN24277_c0_g1	xylulose kinase [Raphidocelis subcapitata]	2.6196	1.38935	0.000105443	0.000874084	yes	up
TRINITY_DN13081_c0_g1	hypothetical protein CEUSTIGMA_g7399.t1 [Chlamydomonas eustigma]	2.15869	1.11015	8.07534e-05	0.000696854	yes	up
TRINITY_DN5532_c0_g1	hypothetical protein CHLNCDRAFT_145257 [Chlorella variabilis]	2.73477	1.45142	4.93263e-05	0.000455837	yes	up
TRINITY_DN5342_c0_g1	hypothetical protein CHLRE_02g095068v5 [Chlamydomonas reinhardtii]	2.96451	1.5678	4.20792e-08	8.89692e-07	yes	up
TRINITY_DN6483_c0_g1	hypothetical protein CBR_g23327 [Chara braunii]	2.23995	1.16347	0.00293668	0.0143334	yes	up
TRINITY_DN12787_c0_g1	acid phosphatase [Chlorella sorokiniana]	6.33858	2.66416	3.48688e-53	4.19932e-50	yes	up
TRINITY_DN181_c0_g1	chitin binding domain-containing [Micractinium conductrix]	3.63486	1.8619	1.14459e-17	1.09401e-15	yes	up
TRINITY_DN9165_c0_g2	chitinase [Chlorella sorokiniana]	2.57173	1.36274	3.96569e-15	2.6528e-13	yes	up
TRINITY_DN1073_c0_g1	hypothetical protein CHLNCDRAFT_51191 [Chlorella variabilis]	2.34367	1.22877	6.45745e-13	3.18723e-11	yes	up
TRINITY_DN11875_c0_g1	bifunctional chitinase lysozyme [Chlorella sorokiniana]	4.89285	2.29068	3.38599e-20	4.43241e-18	yes	up
TRINITY_DN5539_c0_g2	bifunctional chitinase lysozyme [Chlorella sorokiniana]	2.29496	1.19847	6.84026e-10	2.06359e-08	yes	up
TRINITY_DN5979_c0_g1	Endoglucanase A [Auxenochlorella protothecoides]	3.43248	1.77925	8.99699e-11	3.14978e-09	yes	up
TRINITY_DN5381_c1_g2	U6 snRNA phosphodiesterase [Micractinium conductrix]	2.04579	1.03266	9.14652e-05	0.000774201	yes	up
TRINITY_DN7233_c0_g1	hypothetical protein CHLRE_04g216250v5 [Chlamydomonas reinhardtii]	2.1121	1.07868	5.16262e-06	6.40709e-05	yes	up
TRINITY_DN2202_c3_g1	Malate dehydrogenase [Chlamydomonas eustigma]	5.897	2.56	1.31286e-05	0.000567887	yes	up
TRINITY_DN22493_c0_g1	hypothetical protein GPECTOR_6g779 [Gonium pectorale]	2.12958	1.09057	1.71294e-11	6.86726e-10	yes	up
TRINITY_DN2202_c3_g1	hypothetical protein GPECTOR_6g779 [Gonium pectorale]	2.35663	1.23672	1.87369e-06	2.64975e-05	yes	up
TRINITY_DN6280_c0_g1	glutamine-fructose-6-phosphate aminotransferase [isomerizing] 2 [Micractinium conductrix]	3.84314	1.94229	5.59983e-37	2.95789e-34	yes	up
TRINITY_DN9639_c0_g1	glutamine--fructose-6-phosphate aminotransferase [isomerizing] 2 isoform B [Chlorella sorokiniana]	2.35604	1.23637	1.14619e-15	8.58447e-14	yes	up
TRINITY_DN21136_c0_g1	hypothetical protein VOLCADRAFT_109066 [Volvox carteri f. nagariensis]	2.13625	1.09508	4.76028e-08	9.91075e-07	yes	up
TRINITY_DN3521_c0_g3	hypothetical protein VOLCADRAFT_78672 [Volvox carteri f. nagariensis]	2.15026	1.10451	3.13628e-06	4.15612e-05	yes	up
TRINITY_DN25508_c0_g1	branched chain amino acid aminotransferase [Chlorella sorokiniana]	80.7899	6.3361	1.10812e-05	0.000126137	yes	up
TRINITY_DN4005_c0_g3	hypothetical protein CHLNCDRAFT_57448 [Chlorella variabilis]	2.31308	1.20981	8.09468e-14	4.57251e-12	yes	up
TRINITY_DN9575_c3_g1	hypothetical protein CEUSTIGMA_g436.t1 [Chlamydomonas eustigma]	3.72454	1.89706	6.98445e-26	1.64737e-23	yes	up
TRINITY_DN20837_c0_g1	hypothetical protein CEUSTIGMA_g8708.t1 [Chlamydomonas eustigma]	2.14905	1.1037	1.82712e-06	2.59241e-05	yes	up
TRINITY_DN6303_c0_g1	DNA-3-methyladenine glycosylase [Chlorella sorokiniana]	3.29816	1.72166	1.90925e-18	2.02408e-16	yes	up
TRINITY_DN16258_c0_g2	DNA polymerase epsilon catalytic subunit A [Chlorella sorokiniana]	2.71774	1.44241	7.59328e-13	3.7295e-11	yes	up
TRINITY_DN11948_c0_g1	hypothetical protein CEUSTIGMA_g7936.t1 [Chlamydomonas eustigma]	2.22597	1.15444	7.20933e-07	1.14785e-05	yes	up
TRINITY_DN6842_c0_g1	hypothetical protein CHLNCDRAFT_144815 [Chlorella variabilis]	4.17441	2.06157	0.00638633	0.0270473	yes	up
TRINITY_DN3923_c0_g1	hypothetical protein CEUSTIGMA_g7238.t1 [Chlamydomonas eustigma]	2.49478	1.31891	0.00110988	0.00642376	yes	up
TRINITY_DN2342_c0_g3	ATP synthase F0 subunit 6 (mitochondrion) [Micractinium sp. LBA 32]	4.52257	2.17714	0.0265635	0.083619	yes	up
TRINITY_DN6740_c0_g1	Myb O [Micractinium conductrix]	3.21117	1.6831	0.00122408	0.00696815	yes	up
TRINITY_DN25554_c0_g1	hypothetical protein CHLNCDRAFT_138156 [Chlorella variabilis]	2.43583	1.28441	0.00389734	0.0180054	yes	up
TRINITY_DN6419_c0_g9	ATP synthase F1 subunit alpha (mitochondrion) [Micractinium sp. LBA 32]	2.04813	1.03431	0.00276922	0.0136368	yes	up
TRINITY_DN25817_c0_g1	CF0 subunit IV of ATP synthase (chloroplast) [Dicloster acuatus]	10.6656	3.4149	0.00109839	0.00635968	yes	up
TRINITY_DN23101_c0_g1	CF1 beta subunit of ATP synthase (chloroplast) [Netrium digitus]	15.3068	3.9361	0.00599085	0.0256685	yes	up
TRINITY_DN13131_c0_g2	ATP synthase CF1 beta subunit [Parachlorella kessleri]	8.00959	3.00173	1.87068e-12	8.69172e-11	yes	up
TRINITY_DN277_c0_g1	ATP synthase CF1 alpha subunit [Parachlorella kessleri]	23.3961	4.54819	4.25691e-08	8.98157e-07	yes	up
TRINITY_DN6305_c0_g3	hypothetical protein C2E21_4548 [Chlorella sorokiniana]	2.6091	1.38355	5.70839e-08	1.16838e-06	yes	up
TRINITY_DN7665_c1_g1	hypothetical protein CHLRE_16g683900v5 [Chlamydomonas reinhardtii]	3.88078	1.95635	1.01779e-06	1.54453e-05	yes	up
TRINITY_DN3502_c0_g3	ATP synthase subunit c (mitochondrion) [Picochlorum sp. 'soloecismus']	9.49732	3.24752	8.82495e-05	0.000750994	yes	up
TRINITY_DN16521_c0_g1	NADH dehydrogenase subunit 4 (mitochondrion) [Dunaliella viridis]	2.02269	1.01628	0.00393894	0.0181702	yes	up
TRINITY_DN13227_c0_g2	NADH dehydrogenase subunit 2 (mitochondrion) [Micractinium sp. LBA 32]	3.80874	1.92931	0.00126194	0.00713779	yes	up
TRINITY_DN1104_c0_g1	hypothetical protein GPECTOR_26g531 [Gonium pectorale]	3.80546	1.92807	5.89187e-24	1.07511e-21	yes	up
TRINITY_DN3174_c1_g1	Fumarylacetoacetase [Tetrabaena socialis]	3.48282	1.80026	0.000592221	0.00379535	yes	up
TRINITY_DN24007_c0_g1	Rh protein [Chlamydomonas reinhardtii]	2.14182	1.09883	7.30573e-08	1.45863e-06	yes	up
TRINITY_DN24263_c0_g1	hypothetical protein CEUSTIGMA_g10899.t1 [Chlamydomonas eustigma]	2.64609	1.40386	1.62919e-14	1.00929e-12	yes	up
TRINITY_DN225_c0_g2	cytochrome c oxidase subunit 3 (mitochondrion) [Trebouxia aggregata]	3.85213	1.94566	1.10937e-05	0.000126231	yes	up
TRINITY_DN11998_c0_g1	hypothetical protein C2E21_7904 [Chlorella sorokiniana]	2.29366	1.19765	4.14857e-05	0.000393774	yes	up
TRINITY_DN149_c0_g4	mitogen-activated kinase kinase 3 [Chlorella sorokiniana]	3.25473	1.70254	4.76643e-08	9.91075e-07	yes	up
TRINITY_DN7549_c1_g7	hypothetical protein CEUSTIGMA_g6898.t1 [Chlamydomonas eustigma]	2.18337	1.12656	2.87665e-05	0.00028622	yes	up
TRINITY_DN23875_c0_g1	hypothetical protein CEUSTIGMA_g2489.t1 [Chlamydomonas eustigma]	5.31516	2.41011	9.19848e-25	1.884e-22	yes	up
TRINITY_DN4575_c0_g3	ALG-2 interacting isoform A [Micractinium conductrix]	2.14263	1.09939	3.71194e-13	1.88147e-11	yes	up
TRINITY_DN1245_c0_g1	pyruvate dehydrogenase E1 beta subunit [Chlorella sorokiniana]	2.24967	1.16971	5.18319e-08	1.07181e-06	yes	up
TRINITY_DN10538_c0_g2	zeta-carotene desaturase [Micractinium conductrix]	2.45717	1.29698	3.64589e-12	1.62382e-10	yes	up
TRINITY_DN23170_c0_g1	------	19.6557	4.29687	0.0388709	1	yes	up
TRINITY_DN9275_c1_g6	------	2.37213	1.24618	0.00913285	0.0361045	yes	up
TRINITY_DN5752_c0_g1	stress response nst1-like [Micractinium conductrix]	2.35373	1.23495	5.8062e-10	1.76758e-08	yes	up
TRINITY_DN24091_c0_g1	hypothetical protein CEUSTIGMA_g2542.t1 [Chlamydomonas eustigma]	2.07544	1.05342	6.32859e-06	7.67074e-05	yes	up
TRINITY_DN14174_c3_g1	------	2.56554	1.35926	0.0225484	0.0736002	yes	up
TRINITY_DN15465_c0_g1	------	30.403	4.92614	0.0053797	0.0234568	yes	up
TRINITY_DN26894_c0_g1	------	21.3491	4.4161	0.042382	0.120143	yes	up
TRINITY_DN21336_c0_g1	------	25.6572	4.68129	0.00652909	0.0275242	yes	up
TRINITY_DN19921_c0_g1	------	42.687	5.41573	0.00102248	0.00597746	yes	up
TRINITY_DN9442_c0_g4	------	67.8343	6.08394	5.1368e-05	0.000472096	yes	up
TRINITY_DN11342_c0_g2	------	43.3495	5.43794	0.000187054	0.0014247	yes	up
TRINITY_DN10114_c0_g1	------	15.2056	3.92653	0.00506806	0.022341	yes	up
TRINITY_DN9145_c0_g1	------	26.0756	4.70463	0.0157665	0.0558336	yes	up
TRINITY_DN12840_c0_g2	------	33.3542	5.0598	0.000611365	0.00389648	yes	up
TRINITY_DN21065_c0_g1	hypothetical protein CHLNCDRAFT_139910 [Chlorella variabilis]	3.08416	1.62488	4.44482e-06	5.63947e-05	yes	up
TRINITY_DN12585_c0_g2	------	21.7634	4.44383	0.0396114	0.113897	yes	up
TRINITY_DN16911_c0_g1	------	23.2994	4.54222	0.0195851	0.0659731	yes	up
TRINITY_DN26753_c0_g1	------	19.6308	4.29505	0.0363449	1	yes	up
TRINITY_DN8364_c0_g5	------	10.2081	3.35164	9.54886e-05	0.000801497	yes	up
TRINITY_DN10846_c0_g1	------	19.6903	4.29942	0.0180512	0.0619568	yes	up
TRINITY_DN8503_c0_g2	------	5.9377	2.56991	0.00433264	0.0196545	yes	up
TRINITY_DN8503_c0_g1	------	8.95703	3.16302	0.018281	0.0625278	yes	up
TRINITY_DN13646_c0_g2	------	33.6497	5.07252	0.00446298	0.0201335	yes	up
TRINITY_DN16153_c0_g1	------	23.5934	4.56031	0.0210469	0.0697731	yes	up
TRINITY_DN6168_c0_g2	Vacuolar protein sorting-associated protein VTA1-like protein [Auxenochlorella protothecoides]	2.21892	1.14986	2.54082e-12	1.16084e-10	yes	up
TRINITY_DN4332_c0_g1	AMSH-like ubiquitin thioesterase 1 [Auxenochlorella protothecoides]	2.14074	1.09811	4.49656e-05	0.00042149	yes	up
TRINITY_DN13934_c0_g1	------	8.8854	3.15144	0.0461038	0.128361	yes	up
TRINITY_DN13434_c0_g1	------	7.232	2.8544	5.92161e-06	7.24453e-05	yes	up
TRINITY_DN11743_c0_g2	------	15.9661	3.99694	0.0130285	0.0479069	yes	up
TRINITY_DN10056_c0_g2	------	36.0586	5.17227	0.00260471	0.0129645	yes	up
TRINITY_DN10056_c0_g1	------	11.5481	3.52958	0.00355957	0.0167427	yes	up
TRINITY_DN7684_c0_g1	------	8.9701	3.16512	1.98072e-05	0.000207862	yes	up
TRINITY_DN9749_c1_g5	------	3.30775	1.72585	0.0123525	0.0459905	yes	up
TRINITY_DN21153_c0_g1	------	16.2737	4.02447	4.11866e-08	8.73271e-07	yes	up
TRINITY_DN117_c0_g1	Transducin WD40 repeat-like superfamily [Chlorella sorokiniana]	2.02823	1.02022	9.55312e-06	0.000110328	yes	up
TRINITY_DN11800_c0_g1	putative uncharacterized protein LOC103989588 isoform X1 [Chlorella sorokiniana]	3.22924	1.6912	2.65922e-13	1.38759e-11	yes	up
TRINITY_DN23634_c0_g1	predicted protein [Chlamydomonas reinhardtii]	4.69653	2.2316	0.0321512	0.0969464	yes	up
TRINITY_DN5737_c1_g1	predicted protein [Bathycoccus prasinos]	2.40549	1.26633	0.00417079	0.0190408	yes	up
TRINITY_DN4592_c0_g1	microtubule-associated Asp [Micractinium conductrix]	2.06913	1.04903	1.64688e-08	3.82301e-07	yes	up
TRINITY_DN9466_c0_g2	major lipid droplet protein [Dunaliella parva]	2.60668	1.38222	1.60384e-22	2.59616e-20	yes	up
TRINITY_DN7961_c0_g1	leucine rich repeat [Micractinium conductrix]	2.39749	1.26153	5.81965e-13	2.89138e-11	yes	up
TRINITY_DN2640_c0_g1	hypothetical protein VOLCADRAFT_93650 [Volvox carteri f. nagariensis]	2.00982	1.00707	6.59834e-05	0.000585163	yes	up
TRINITY_DN8034_c0_g2	hypothetical protein VOLCADRAFT_88115 [Volvox carteri f. nagariensis]	2.73509	1.45159	0.0395477	0.11379	yes	up
TRINITY_DN9414_c0_g1	hypothetical protein VOLCADRAFT_87764 [Volvox carteri f. nagariensis]	2.10793	1.07583	0.000582183	0.00374298	yes	up
TRINITY_DN1012_c1_g1	hypothetical protein VOLCADRAFT_68382 [Volvox carteri f. nagariensis]	2.27261	1.18435	3.43233e-10	1.08329e-08	yes	up
TRINITY_DN1032_c0_g2	hypothetical protein VOLCADRAFT_118954 [Volvox carteri f. nagariensis]	2.49149	1.31701	0.000143424	0.00113876	yes	up
TRINITY_DN15614_c0_g1	hypothetical protein VOLCADRAFT_107511 [Volvox carteri f. nagariensis]	2.39968	1.26284	0.000764351	0.00469559	yes	up
TRINITY_DN25202_c0_g1	hypothetical protein VOLCADRAFT_107046 [Volvox carteri f. nagariensis]	4.27712	2.09664	8.14502e-27	2.11405e-24	yes	up
TRINITY_DN20813_c0_g1	hypothetical protein VOLCADRAFT_106870 [Volvox carteri f. nagariensis]	2.02142	1.01537	3.01521e-08	6.59752e-07	yes	up
TRINITY_DN2864_c0_g4	hypothetical protein VOLCADRAFT_106214 [Volvox carteri f. nagariensis]	2.1068	1.07505	2.82061e-05	0.000281338	yes	up
TRINITY_DN1434_c0_g1	hypothetical protein VOLCADRAFT_105383 [Volvox carteri f. nagariensis]	2.0826	1.05839	0.000289537	0.00206891	yes	up
TRINITY_DN13911_c0_g2	hypothetical protein TSOC_014544, partial [Tetrabaena socialis]	4.573	2.19314	1.98122e-11	7.8903e-10	yes	up
TRINITY_DN2870_c0_g1	hypothetical protein TSOC_013890, partial [Tetrabaena socialis]	2.00304	1.00219	0.0149147	0.0533443	yes	up
TRINITY_DN18862_c0_g1	hypothetical protein TSOC_011376 [Tetrabaena socialis]	2.03012	1.02157	0.000166747	0.00129359	yes	up
TRINITY_DN23188_c0_g1	hypothetical protein TSOC_010243 [Tetrabaena socialis]	2.14035	1.09784	0.0321306	0.0969034	yes	up
TRINITY_DN6528_c0_g1	hypothetical protein TSOC_006762 [Tetrabaena socialis]	2.29245	1.19689	4.27651e-05	0.000404134	yes	up
TRINITY_DN8057_c0_g2	hypothetical protein TSOC_001061 [Tetrabaena socialis]	2.893	1.53256	5.0392e-15	3.34186e-13	yes	up
TRINITY_DN15964_c0_g1	hypothetical protein Rsub_13274 [Raphidocelis subcapitata]	2.58249	1.36876	1.214e-09	3.50101e-08	yes	up
TRINITY_DN18115_c0_g1	hypothetical protein Rsub_10371 [Raphidocelis subcapitata]	3.04491	1.6064	3.63764e-08	7.78961e-07	yes	up
TRINITY_DN16135_c0_g4	hypothetical protein Rsub_07853 [Raphidocelis subcapitata]	3.08907	1.62717	0.0232735	0.0755248	yes	up
TRINITY_DN19001_c0_g1	hypothetical protein Rsub_06642 [Raphidocelis subcapitata]	2.25289	1.17177	5.45927e-09	1.38008e-07	yes	up
TRINITY_DN3580_c0_g2	hypothetical protein Rsub_06141 [Raphidocelis subcapitata]	2.09498	1.06694	0.0212866	0.0704051	yes	up
TRINITY_DN761_c0_g4	hypothetical protein Rsub_04812 [Raphidocelis subcapitata]	3.63695	1.86273	0.000338652	0.00236624	yes	up
TRINITY_DN6920_c0_g1	hypothetical protein Rsub_03433 [Raphidocelis subcapitata]	2.24104	1.16417	5.45868e-05	0.000497277	yes	up
TRINITY_DN7220_c1_g3	hypothetical protein Rsub_03267 [Raphidocelis subcapitata]	2.68411	1.42444	0.0182127	0.0623762	yes	up
TRINITY_DN6849_c0_g7	hypothetical protein Rsub_00751 [Raphidocelis subcapitata]	2.08	1.05658	0.0067682	0.0283378	yes	up
TRINITY_DN7973_c0_g1	hypothetical protein MNEG_7277 [Monoraphidium neglectum]	2.38191	1.25212	0.00666832	0.0279896	yes	up
TRINITY_DN15357_c0_g1	hypothetical protein MNEG_5932 [Monoraphidium neglectum]	15.1852	3.9246	0.027573	0.0859208	yes	up
TRINITY_DN10387_c0_g2	hypothetical protein MNEG_5253 [Monoraphidium neglectum]	2.62723	1.39354	2.11349e-07	3.81722e-06	yes	up
TRINITY_DN10275_c1_g1	hypothetical protein H632_c1826p0, partial [Helicosporidium sp. ATCC 50920]	4.54311	2.18368	9.76308e-12	4.03773e-10	yes	up
TRINITY_DN805_c0_g1	hypothetical protein H632_c1555p1 [Helicosporidium sp. ATCC 50920]	2.21757	1.14898	2.46811e-16	2.01382e-14	yes	up
TRINITY_DN9661_c1_g2	hypothetical protein GPECTOR_5g19 [Gonium pectorale]	2.56407	1.35844	0.00204898	0.0106991	yes	up
TRINITY_DN7286_c0_g9	hypothetical protein GPECTOR_50g572 [Gonium pectorale]	3.68838	1.88299	0.00162317	0.00883093	yes	up
TRINITY_DN7823_c0_g1	hypothetical protein GPECTOR_4g547 [Gonium pectorale]	2.14211	1.09903	0.01926	0.0650892	yes	up
TRINITY_DN5180_c0_g1	hypothetical protein GPECTOR_41g707 [Gonium pectorale]	2.10013	1.07048	1.08987e-05	0.0001242	yes	up
TRINITY_DN9899_c0_g1	hypothetical protein GPECTOR_1g822 [Gonium pectorale]	2.11821	1.08284	4.13649e-12	1.82078e-10	yes	up
TRINITY_DN7081_c0_g1	hypothetical protein GPECTOR_1g425 [Gonium pectorale]	2.76763	1.46865	1.12434e-07	2.14386e-06	yes	up
TRINITY_DN6957_c0_g3	hypothetical protein GPECTOR_14g176 [Gonium pectorale]	2.19386	1.13347	0.0349166	0.103015	yes	up
TRINITY_DN2590_c0_g4	hypothetical protein F751_3777 [Auxenochlorella protothecoides]	2.06057	1.04304	2.64415e-18	2.73574e-16	yes	up
TRINITY_DN1146_c0_g1	hypothetical protein F751_1976 [Auxenochlorella protothecoides]	2.18536	1.12787	9.7931e-11	3.40579e-09	yes	up
TRINITY_DN1216_c0_g2	hypothetical protein COCSUDRAFT_9899, partial [Coccomyxa subellipsoidea C-169]	7.35941	2.87959	0.00043327	0.00291832	yes	up
TRINITY_DN8822_c0_g1	hypothetical protein COCSUDRAFT_59186 [Coccomyxa subellipsoidea C-169]	2.98619	1.57831	1.28131e-10	4.36398e-09	yes	up
TRINITY_DN18073_c0_g1	hypothetical protein COCSUDRAFT_56593 [Coccomyxa subellipsoidea C-169]	3.12376	1.64329	2.54945e-11	9.86618e-10	yes	up
TRINITY_DN8977_c0_g1	hypothetical protein COCSUDRAFT_56292 [Coccomyxa subellipsoidea C-169]	2.11465	1.08042	2.70742e-05	0.000271264	yes	up
TRINITY_DN16095_c0_g1	hypothetical protein COCSUDRAFT_53931 [Coccomyxa subellipsoidea C-169]	2.82227	1.49686	2.14889e-05	0.000222792	yes	up
TRINITY_DN10008_c0_g1	hypothetical protein COCSUDRAFT_49242 [Coccomyxa subellipsoidea C-169]	3.55451	1.82965	3.42778e-20	4.46768e-18	yes	up
TRINITY_DN8908_c0_g1	hypothetical protein CHLRE_34g759097v5 [Chlamydomonas reinhardtii]	7.10119	2.82806	6.8315e-06	8.17499e-05	yes	up
TRINITY_DN26346_c0_g1	hypothetical protein CHLRE_16g686501v5 [Chlamydomonas reinhardtii]	25.628	4.67965	0.0113682	0.0430698	yes	up
TRINITY_DN2475_c0_g1	hypothetical protein CHLRE_11g467794v5 [Chlamydomonas reinhardtii]	2.82717	1.49936	4.83599e-08	1.00485e-06	yes	up
TRINITY_DN16064_c0_g1	hypothetical protein CHLRE_11g467559v5 [Chlamydomonas reinhardtii]	2.02044	1.01467	4.54467e-05	0.000425205	yes	up
TRINITY_DN11862_c0_g1	hypothetical protein CHLRE_06g285451v5 [Chlamydomonas reinhardtii]	2.22175	1.1517	0.00073973	0.00456857	yes	up
TRINITY_DN1920_c0_g1	hypothetical protein CHLRE_05g248050v5 [Chlamydomonas reinhardtii]	3.24258	1.69714	5.85868e-08	1.19829e-06	yes	up
TRINITY_DN18859_c0_g1	hypothetical protein CHLRE_03g178050v5 [Chlamydomonas reinhardtii]	2.04315	1.0308	4.32169e-05	0.000407509	yes	up
TRINITY_DN804_c2_g1	hypothetical protein CHLPROCp009, partial [Auxenochlorella protothecoides]	13.7219	3.77841	1.02129e-07	1.95978e-06	yes	up
TRINITY_DN2175_c0_g1	hypothetical protein CHLPROCp009, partial [Auxenochlorella protothecoides]	3.48914	1.80287	0.000470994	0.00313455	yes	up
TRINITY_DN3346_c0_g3	hypothetical protein CHLPROCp009, partial [Auxenochlorella protothecoides]	5.39918	2.43274	0.00160861	0.00877327	yes	up
TRINITY_DN12114_c0_g5	hypothetical protein CHLPROCp009, partial [Auxenochlorella protothecoides]	32.2554	5.01147	0.00366166	0.0171615	yes	up
TRINITY_DN5811_c0_g1	hypothetical protein CHLNCDRAFT_144591 [Chlorella variabilis]	2.31268	1.20956	3.21023e-07	5.54207e-06	yes	up
TRINITY_DN4556_c0_g2	hypothetical protein CHLNCDRAFT_141740 [Chlorella variabilis]	3.97338	1.99037	5.38336e-08	1.10863e-06	yes	up
TRINITY_DN1181_c0_g1	hypothetical protein CHLNCDRAFT_141467 [Chlorella variabilis]	2.84504	1.50845	6.24945e-08	1.26536e-06	yes	up
TRINITY_DN9606_c0_g1	hypothetical protein CHLNCDRAFT_133859 [Chlorella variabilis]	6.10854	2.61083	4.62133e-68	9.9385e-65	yes	up
TRINITY_DN4914_c0_g1	hypothetical protein CHLNCDRAFT_133340, partial [Chlorella variabilis]	3.12745	1.64499	4.6465e-19	5.29913e-17	yes	up
TRINITY_DN7118_c0_g2	hypothetical protein CEUSTIGMA_g9953.t1 [Chlamydomonas eustigma]	2.19593	1.13483	0.00481582	0.0214472	yes	up
TRINITY_DN999_c0_g1	hypothetical protein CEUSTIGMA_g9653.t1 [Chlamydomonas eustigma]	2.22334	1.15273	8.26634e-07	1.2929e-05	yes	up
TRINITY_DN11955_c0_g2	hypothetical protein CEUSTIGMA_g8259.t1 [Chlamydomonas eustigma]	2.0164	1.01178	0.000836938	0.00505792	yes	up
TRINITY_DN2305_c0_g5	hypothetical protein CEUSTIGMA_g8024.t1 [Chlamydomonas eustigma]	2.3056	1.20514	0.00142056	0.0078868	yes	up
TRINITY_DN2930_c0_g3	hypothetical protein CEUSTIGMA_g6791.t1 [Chlamydomonas eustigma]	2.15519	1.10782	0.000648235	0.00408687	yes	up
TRINITY_DN9075_c0_g1	hypothetical protein CEUSTIGMA_g6247.t1 [Chlamydomonas eustigma]	4.17212	2.06078	0.00705825	0.0293036	yes	up
TRINITY_DN19190_c0_g1	hypothetical protein CEUSTIGMA_g6236.t1 [Chlamydomonas eustigma]	2.76125	1.46532	7.88649e-14	4.48012e-12	yes	up
TRINITY_DN3221_c0_g1	hypothetical protein CEUSTIGMA_g5598.t1 [Chlamydomonas eustigma]	2.9165	1.54424	3.99145e-06	5.13347e-05	yes	up
TRINITY_DN7989_c0_g3	hypothetical protein CEUSTIGMA_g5536.t1 [Chlamydomonas eustigma]	2.15423	1.10717	0.00609691	0.0260472	yes	up
TRINITY_DN20967_c0_g1	hypothetical protein CEUSTIGMA_g5062.t1 [Chlamydomonas eustigma]	2.0562	1.03998	3.84003e-06	4.95566e-05	yes	up
TRINITY_DN20529_c0_g1	hypothetical protein CEUSTIGMA_g5009.t1 [Chlamydomonas eustigma]	2.0978	1.06888	0.00176049	0.00943313	yes	up
TRINITY_DN24332_c0_g1	hypothetical protein CEUSTIGMA_g4943.t1 [Chlamydomonas eustigma]	2.27638	1.18674	0.0126662	0.0468755	yes	up
TRINITY_DN9845_c0_g4	hypothetical protein CEUSTIGMA_g4846.t1 [Chlamydomonas eustigma]	2.49686	1.32012	0.0417316	0.118617	yes	up
TRINITY_DN13403_c0_g1	hypothetical protein CEUSTIGMA_g4571.t1 [Chlamydomonas eustigma]	2.07653	1.05417	0.000266693	0.00193142	yes	up
TRINITY_DN3741_c0_g1	hypothetical protein CEUSTIGMA_g4489.t1 [Chlamydomonas eustigma]	2.8098	1.49047	2.5989e-12	1.18557e-10	yes	up
TRINITY_DN8734_c0_g11	hypothetical protein CEUSTIGMA_g448.t1 [Chlamydomonas eustigma]	2.31679	1.21213	8.13839e-05	0.000700855	yes	up
TRINITY_DN15562_c0_g1	hypothetical protein CEUSTIGMA_g307.t1 [Chlamydomonas eustigma]	2.3295	1.22002	0.0176865	0.0609485	yes	up
TRINITY_DN12950_c2_g1	hypothetical protein CEUSTIGMA_g2525.t1 [Chlamydomonas eustigma]	2.70077	1.43337	5.38086e-05	0.000491526	yes	up
TRINITY_DN6437_c0_g1	hypothetical protein CEUSTIGMA_g2332.t1 [Chlamydomonas eustigma]	2.03101	1.0222	1.85442e-08	4.26023e-07	yes	up
TRINITY_DN8672_c1_g3	hypothetical protein CEUSTIGMA_g1838.t1 [Chlamydomonas eustigma]	2.27549	1.18617	0.0129906	0.0477909	yes	up
TRINITY_DN5221_c1_g1	hypothetical protein CEUSTIGMA_g1478.t1 [Chlamydomonas eustigma]	2.56168	1.35709	3.98439e-15	2.65403e-13	yes	up
TRINITY_DN6502_c0_g1	hypothetical protein CEUSTIGMA_g13739.t1, partial [Chlamydomonas eustigma]	2.0053	1.00382	0.000203148	0.00153025	yes	up
TRINITY_DN10986_c0_g4	hypothetical protein CEUSTIGMA_g13258.t1 [Chlamydomonas eustigma]	2.09249	1.06522	2.32782e-10	7.56052e-09	yes	up
TRINITY_DN7702_c0_g2	hypothetical protein CEUSTIGMA_g12424.t1 [Chlamydomonas eustigma]	2.27673	1.18696	4.24372e-06	5.41351e-05	yes	up
TRINITY_DN360_c1_g3	hypothetical protein CEUSTIGMA_g119.t1 [Chlamydomonas eustigma]	2.27284	1.18449	0.000281686	0.00202169	yes	up
TRINITY_DN3499_c0_g1	hypothetical protein CEUSTIGMA_g1178.t1 [Chlamydomonas eustigma]	2.15179	1.10554	9.82707e-09	2.38223e-07	yes	up
TRINITY_DN19243_c0_g1	hypothetical protein CEUSTIGMA_g11692.t1 [Chlamydomonas eustigma]	2.2134	1.14627	3.42173e-07	5.86683e-06	yes	up
TRINITY_DN10326_c0_g2	hypothetical protein CBR_g6414 [Chara braunii]	2.51822	1.3324	0.000156973	0.00122949	yes	up
TRINITY_DN3125_c0_g2	hypothetical protein CBR_g12953 [Chara braunii]	17.5393	4.13252	9.15457e-05	0.000774448	yes	up
TRINITY_DN7004_c0_g2	hypothetical protein C2E21_9383 [Chlorella sorokiniana]	4.32768	2.11359	1.73771e-25	3.87548e-23	yes	up
TRINITY_DN11457_c0_g1	hypothetical protein C2E21_8875 [Chlorella sorokiniana]	2.16336	1.11327	1.01912e-10	3.5309e-09	yes	up
TRINITY_DN19078_c0_g1	hypothetical protein C2E21_6721 [Chlorella sorokiniana]	8.78502	3.13505	1.11548e-12	5.35643e-11	yes	up
TRINITY_DN245_c0_g1	hypothetical protein C2E21_5167 [Chlorella sorokiniana]	3.22171	1.68782	2.35449e-21	3.44122e-19	yes	up
TRINITY_DN1494_c0_g1	hypothetical protein C2E21_3698 [Chlorella sorokiniana]	8.64834	3.11242	2.84865e-71	7.14726e-68	yes	up
TRINITY_DN13584_c0_g2	hypothetical protein C2E21_2741 [Chlorella sorokiniana]	4.92873	2.30122	2.81874e-24	5.3713e-22	yes	up
TRINITY_DN2738_c0_g2	hypothetical protein C2E21_0217 [Chlorella sorokiniana]	4.15534	2.05496	3.46127e-19	4.07078e-17	yes	up
TRINITY_DN4582_c0_g1	hypothetical protein C2E21_0217 [Chlorella sorokiniana]	3.88856	1.95924	2.41558e-13	1.2737e-11	yes	up
TRINITY_DN1508_c0_g1	hypothetical protein C2E20_9115 [Micractinium conductrix]	2.16955	1.1174	1.26406e-09	3.6177e-08	yes	up
TRINITY_DN16355_c1_g2	hypothetical protein C2E20_8948 isoform A [Micractinium conductrix]	5.57514	2.47901	0.0300351	0.0917043	yes	up
TRINITY_DN10553_c0_g2	hypothetical protein C2E20_8650 [Micractinium conductrix]	4.30379	2.10561	2.12705e-19	2.54132e-17	yes	up
TRINITY_DN5241_c0_g1	hypothetical protein C2E20_7867 [Micractinium conductrix]	5.33062	2.4143	1.74842e-19	2.09727e-17	yes	up
TRINITY_DN15327_c0_g3	hypothetical protein C2E20_6772 [Micractinium conductrix]	4.65623	2.21916	7.65281e-19	8.47098e-17	yes	up
TRINITY_DN20959_c0_g1	hypothetical protein C2E20_5367 [Micractinium conductrix]	4.11063	2.03936	2.37242e-17	2.17771e-15	yes	up
TRINITY_DN5675_c0_g1	hypothetical protein C2E20_4894 [Micractinium conductrix]	2.29599	1.19912	1.2288e-10	4.20589e-09	yes	up
TRINITY_DN12787_c0_g2	hypothetical protein C2E20_4619 [Micractinium conductrix]	8.16781	3.02995	8.90544e-11	3.1246e-09	yes	up
TRINITY_DN7122_c0_g1	hypothetical protein C2E20_3004 [Micractinium conductrix]	5.01905	2.32742	1.45234e-15	1.05621e-13	yes	up
TRINITY_DN23080_c0_g1	hypothetical protein C2E20_1897 [Micractinium conductrix]	5.2027	2.37926	1.15295e-11	4.70366e-10	yes	up
TRINITY_DN4179_c0_g1	hypothetical protein [Dunaliella viridis]	2.06698	1.04752	1.97267e-07	3.5887e-06	yes	up
TRINITY_DN3467_c1_g2	hypothetical protein [Dunaliella viridis]	3.32757	1.73447	6.74568e-07	1.07974e-05	yes	up
TRINITY_DN10970_c3_g1	hypothetical protein [Dunaliella viridis]	2.57444	1.36426	0.0340471	0.101143	yes	up
TRINITY_DN10970_c3_g2	hypothetical protein [Dunaliella viridis]	3.56924	1.83562	0.0362999	0.106314	yes	up
TRINITY_DN8363_c0_g2	G-patch domain-containing [Micractinium conductrix]	2.19076	1.13143	6.57204e-08	1.32532e-06	yes	up
TRINITY_DN26940_c0_g1	fasciclin-like arabinogalactan [Micractinium conductrix]	3.25222	1.70143	1.38191e-15	1.00987e-13	yes	up
TRINITY_DN1944_c0_g2	expressed protein [Chlorella variabilis]	2.43994	1.28685	9.32288e-24	1.65114e-21	yes	up
TRINITY_DN3164_c0_g1	expressed protein [Chlorella variabilis]	2.19083	1.13148	9.17286e-11	3.2039e-09	yes	up
TRINITY_DN2671_c0_g1	DUF3099 domain-containing [Micractinium conductrix]	2.46556	1.30191	4.50599e-10	1.40441e-08	yes	up
TRINITY_DN1629_c0_g2	CLIP-associated -like isoform B [Micractinium conductrix]	3.43772	1.78145	1.11812e-09	3.23696e-08	yes	up
TRINITY_DN26451_c0_g1	calcium sensing receptor [Chlamydomonas reinhardtii]	2.14577	1.10149	3.01495e-06	4.01834e-05	yes	up
TRINITY_DN6725_c0_g1	Calcium sensing chloroplastic [Micractinium conductrix]	2.23172	1.15816	3.5004e-18	3.53658e-16	yes	up
TRINITY_DN5995_c0_g1	cadmium resistance protein 2 [Dunaliella viridis]	2.61065	1.38441	1.76233e-18	1.88826e-16	yes	up
TRINITY_DN17362_c0_g2	beta-Ig-H3 fasciclin [Chlorella sorokiniana]	3.48275	1.80023	5.16784e-22	8.10382e-20	yes	up
TRINITY_DN6285_c1_g1	astaxanthin vesicles associated protein [Haematococcus lacustris]	2.28796	1.19406	4.57084e-11	1.69065e-09	yes	up
TRINITY_DN13851_c0_g3	------	72.2638	6.1752	5.2791e-05	0.00048311	yes	up
TRINITY_DN10915_c0_g2	------	23.1207	4.53111	0.0189045	0.0641399	yes	up
TRINITY_DN11012_c0_g1	------	49.6245	5.63298	0.000516172	0.00339247	yes	up
TRINITY_DN18928_c0_g1	------	44.8199	5.48607	0.000714471	0.00443715	yes	up
TRINITY_DN21945_c0_g1	------	26.1748	4.71011	0.0206523	0.0687526	yes	up
TRINITY_DN18202_c0_g1	------	51.9121	5.698	0.000341486	0.00238217	yes	up
TRINITY_DN23595_c0_g1	------	63.5383	5.98956	6.58922e-05	0.000584526	yes	up
TRINITY_DN23925_c0_g1	------	24.6282	4.62224	0.0179446	0.061626	yes	up
TRINITY_DN12339_c0_g1	------	51.956	5.69922	0.000283755	0.00203412	yes	up
TRINITY_DN25025_c0_g1	------	14.9799	3.90495	0.00617245	0.0263155	yes	up
TRINITY_DN12817_c0_g1	------	31.8818	4.99466	0.006747	0.0282608	yes	up
TRINITY_DN18169_c0_g1	------	27.4797	4.7803	0.0098244	0.0382755	yes	up
TRINITY_DN23624_c0_g1	------	15.9813	3.99831	0.00404332	0.0185638	yes	up
TRINITY_DN18132_c0_g1	------	70.7924	6.14552	6.27973e-06	7.61848e-05	yes	up
TRINITY_DN24284_c0_g1	------	13.2912	3.73239	0.0031883	0.0153393	yes	up
TRINITY_DN20879_c0_g1	------	15.4997	3.95417	0.00403914	0.0185495	yes	up
TRINITY_DN19441_c0_g1	------	32.894	5.03975	0.00573806	0.0247545	yes	up
TRINITY_DN11098_c0_g4	------	26.0486	4.70314	0.0148376	0.0531377	yes	up
TRINITY_DN25324_c0_g1	------	26.6554	4.73635	0.0109871	0.0418735	yes	up
TRINITY_DN1800_c0_g2	------	28.7771	4.84685	1.66548e-174	5.01442e-170	yes	up
TRINITY_DN1062_c0_g1	------	29.9721	4.90555	4.84617e-162	7.29542e-158	yes	up
TRINITY_DN572_c0_g1	------	12.5247	3.6467	4.91281e-108	2.9583e-104	yes	up
TRINITY_DN3128_c1_g1	------	6.90086	2.78678	1.45841e-66	2.58293e-63	yes	up
TRINITY_DN25145_c0_g1	------	8.84028	3.14409	7.32167e-48	7.87288e-45	yes	up
TRINITY_DN429_c0_g2	------	2.7036	1.43488	6.14392e-33	2.40235e-30	yes	up
TRINITY_DN5065_c0_g3	------	3.22138	1.68768	6.77999e-30	2.19497e-27	yes	up
TRINITY_DN575_c0_g1	------	3.12628	1.64445	7.39644e-28	2.14127e-25	yes	up
TRINITY_DN20849_c0_g1	------	5.79154	2.53395	3.99217e-24	7.55952e-22	yes	up
TRINITY_DN11275_c0_g1	------	50.5826	5.66057	1.13508e-21	1.70024e-19	yes	up
TRINITY_DN724_c0_g1	------	2.92043	1.54618	4.36487e-21	6.28792e-19	yes	up
TRINITY_DN2939_c0_g1	------	2.77995	1.47506	2.59305e-20	3.4242e-18	yes	up
TRINITY_DN25353_c0_g1	------	5.03038	2.33067	1.26521e-18	1.3731e-16	yes	up
TRINITY_DN15314_c0_g1	------	5.04714	2.33547	2.18776e-18	2.29509e-16	yes	up
TRINITY_DN22368_c0_g1	------	3.43563	1.78057	5.42815e-18	5.34087e-16	yes	up
TRINITY_DN11895_c0_g1	------	3.42697	1.77693	6.4885e-18	6.32219e-16	yes	up
TRINITY_DN3629_c2_g1	------	2.64253	1.40192	4.26892e-17	3.83668e-15	yes	up
TRINITY_DN8489_c0_g1	------	5.09619	2.34942	4.68803e-17	4.20081e-15	yes	up
TRINITY_DN597_c0_g4	------	4.42226	2.14478	2.64862e-16	2.15526e-14	yes	up
TRINITY_DN3401_c0_g1	------	3.05504	1.61119	2.74132e-16	2.2187e-14	yes	up
TRINITY_DN3817_c0_g1	------	6.71093	2.74651	1.28373e-15	9.47316e-14	yes	up
TRINITY_DN2007_c0_g2	------	3.04007	1.60411	1.48838e-15	1.07981e-13	yes	up
TRINITY_DN7207_c0_g1	------	2.7892	1.47985	3.49314e-15	2.34758e-13	yes	up
TRINITY_DN151_c0_g2	------	3.86147	1.94915	1.24474e-14	7.85672e-13	yes	up
TRINITY_DN2344_c0_g2	------	2.2772	1.18726	1.25451e-14	7.90185e-13	yes	up
TRINITY_DN7690_c0_g1	------	8.36403	3.0642	1.39697e-14	8.70805e-13	yes	up
TRINITY_DN6876_c0_g1	------	2.85758	1.51479	6.73912e-14	3.87902e-12	yes	up
TRINITY_DN8081_c0_g1	------	3.79895	1.9256	6.77537e-14	3.88558e-12	yes	up
TRINITY_DN9006_c0_g1	------	2.94702	1.55926	1.87896e-13	1.01021e-11	yes	up
TRINITY_DN2664_c0_g1	------	2.35205	1.23392	2.31023e-13	1.22029e-11	yes	up
TRINITY_DN7418_c1_g7	------	8.07702	3.01382	2.76093e-13	1.43568e-11	yes	up
TRINITY_DN6723_c0_g1	------	4.7328	2.24269	2.96689e-13	1.52957e-11	yes	up
TRINITY_DN2890_c1_g1	------	3.23676	1.69455	3.542e-13	1.80444e-11	yes	up
TRINITY_DN11880_c0_g1	------	3.19807	1.6772	7.72575e-13	3.78838e-11	yes	up
TRINITY_DN2570_c0_g1	------	2.91841	1.54518	7.85423e-13	3.83888e-11	yes	up
TRINITY_DN4074_c0_g2	------	2.29838	1.20062	1.38965e-12	6.56825e-11	yes	up
TRINITY_DN6554_c0_g1	------	6.70025	2.74421	1.55641e-12	7.33339e-11	yes	up
TRINITY_DN9215_c0_g3	------	3.60559	1.85024	1.77002e-12	8.26923e-11	yes	up
TRINITY_DN8976_c0_g2	------	407.742	8.67151	2.2398e-12	1.02956e-10	yes	up
TRINITY_DN3350_c0_g1	------	2.64446	1.40297	2.83657e-12	1.2862e-10	yes	up
TRINITY_DN9209_c0_g1	------	3.67831	1.87904	5.87663e-12	2.51684e-10	yes	up
TRINITY_DN19343_c0_g1	------	2.64053	1.40083	7.59781e-12	3.1949e-10	yes	up
TRINITY_DN22469_c0_g1	------	364.673	8.51046	8.40427e-12	3.51439e-10	yes	up
TRINITY_DN961_c0_g1	------	2.73824	1.45325	8.98807e-12	3.73774e-10	yes	up
TRINITY_DN5618_c0_g2	------	2.77091	1.47036	9.69834e-12	4.02201e-10	yes	up
TRINITY_DN2834_c0_g4	------	4.04181	2.015	9.84023e-12	4.06406e-10	yes	up
TRINITY_DN2058_c1_g3	------	2.42246	1.27647	1.2734e-11	5.17404e-10	yes	up
TRINITY_DN702_c0_g5	------	2.41895	1.27438	2.98593e-11	1.14523e-09	yes	up
TRINITY_DN6823_c0_g1	------	2.52874	1.33842	3.97764e-11	1.484e-09	yes	up
TRINITY_DN540_c0_g1	------	2.36958	1.24463	5.26389e-11	1.92804e-09	yes	up
TRINITY_DN4546_c0_g1	------	2.78655	1.47848	8.08321e-11	2.8598e-09	yes	up
TRINITY_DN429_c0_g1	------	2.33906	1.22593	1.66862e-10	5.56354e-09	yes	up
TRINITY_DN2285_c0_g1	------	2.23001	1.15705	1.8707e-10	6.16902e-09	yes	up
TRINITY_DN22759_c0_g1	------	5.36457	2.42346	4.62064e-10	1.43569e-08	yes	up
TRINITY_DN1083_c2_g1	------	2.23762	1.16196	5.12868e-10	1.58374e-08	yes	up
TRINITY_DN22466_c0_g1	------	5.4485	2.44586	7.63382e-10	2.27789e-08	yes	up
TRINITY_DN627_c1_g3	------	6.25658	2.64538	8.63343e-10	2.5559e-08	yes	up
TRINITY_DN2938_c0_g1	------	2.22143	1.15149	1.23663e-09	3.5561e-08	yes	up
TRINITY_DN11534_c0_g1	------	3.2358	1.69412	1.24096e-09	3.56516e-08	yes	up
TRINITY_DN3934_c0_g1	------	5.80165	2.53646	1.30243e-09	3.71692e-08	yes	up
TRINITY_DN13074_c0_g1	------	2.50165	1.32288	2.50558e-09	6.75363e-08	yes	up
TRINITY_DN1765_c0_g2	------	50.4715	5.6574	2.73291e-09	7.30102e-08	yes	up
TRINITY_DN22364_c0_g1	------	8.63046	3.10944	3.08615e-09	8.18659e-08	yes	up
TRINITY_DN3857_c0_g1	------	196.914	7.62142	3.55139e-09	9.32217e-08	yes	up
TRINITY_DN4805_c0_g1	------	5.15428	2.36577	3.81487e-09	9.97033e-08	yes	up
TRINITY_DN6163_c0_g1	------	2.48795	1.31496	3.96635e-09	1.03214e-07	yes	up
TRINITY_DN2777_c0_g1	------	2.86796	1.52002	4.27741e-09	1.10734e-07	yes	up
TRINITY_DN21484_c0_g1	------	5.89243	2.55886	4.42243e-09	1.14096e-07	yes	up
TRINITY_DN6795_c0_g1	------	2.07811	1.05527	6.68394e-09	1.66589e-07	yes	up
TRINITY_DN559_c0_g1	------	2.9945	1.58231	7.8734e-09	1.93987e-07	yes	up
TRINITY_DN10420_c0_g1	------	167.626	7.3891	1.46332e-08	3.442e-07	yes	up
TRINITY_DN13088_c0_g1	------	157.979	7.30359	2.60655e-08	5.78747e-07	yes	up
TRINITY_DN15267_c0_g3	------	5.55696	2.4743	4.47411e-08	9.37986e-07	yes	up
TRINITY_DN4147_c0_g1	------	15.901	3.99105	4.61977e-08	9.6391e-07	yes	up
TRINITY_DN1311_c0_g1	------	22.636	4.50054	5.17503e-08	1.07086e-06	yes	up
TRINITY_DN7855_c0_g1	------	2.30474	1.2046	6.00484e-08	1.22307e-06	yes	up
TRINITY_DN7010_c0_g3	------	3.29201	1.71897	7.42819e-08	1.48013e-06	yes	up
TRINITY_DN4052_c0_g2	------	2.06458	1.04585	9.14075e-08	1.7836e-06	yes	up
TRINITY_DN685_c0_g1	------	2.01282	1.00922	9.48086e-08	1.83337e-06	yes	up
TRINITY_DN2915_c1_g2	------	2.10573	1.07432	1.41148e-07	2.62975e-06	yes	up
TRINITY_DN5536_c0_g1	------	2.65311	1.40768	1.99577e-07	3.62853e-06	yes	up
TRINITY_DN10654_c0_g1	------	33.6039	5.07056	2.38011e-07	4.24528e-06	yes	up
TRINITY_DN20760_c0_g1	------	4.16751	2.05919	2.58974e-07	4.58388e-06	yes	up
TRINITY_DN10133_c0_g1	------	2.16097	1.11168	3.44448e-07	5.89577e-06	yes	up
TRINITY_DN26097_c0_g1	------	3.4885	1.80261	3.84072e-07	6.48187e-06	yes	up
TRINITY_DN7849_c0_g1	------	2.42692	1.27913	4.6458e-07	7.69394e-06	yes	up
TRINITY_DN5117_c0_g4	------	3.59177	1.8447	5.27872e-07	8.63759e-06	yes	up
TRINITY_DN1861_c0_g1	------	2.37377	1.24718	5.5262e-07	8.99854e-06	yes	up
TRINITY_DN865_c0_g1	------	2.52634	1.33705	6.75235e-07	1.08023e-05	yes	up
TRINITY_DN6204_c0_g4	------	86.9711	6.44246	7.85687e-07	1.23721e-05	yes	up
TRINITY_DN371_c0_g1	------	2.24641	1.16762	8.78856e-07	1.35974e-05	yes	up
TRINITY_DN12397_c0_g1	------	28.041	4.80947	9.2346e-07	1.41782e-05	yes	up
TRINITY_DN5438_c0_g1	------	4.0328	2.01178	9.43045e-07	1.44421e-05	yes	up
TRINITY_DN6752_c0_g4	------	2.80834	1.48972	9.57798e-07	1.46457e-05	yes	up
TRINITY_DN4076_c0_g4	------	3.37493	1.75486	1.43636e-06	2.10544e-05	yes	up
TRINITY_DN4179_c0_g3	------	2.79068	1.48062	1.44339e-06	2.11472e-05	yes	up
TRINITY_DN6579_c0_g2	------	2.92004	1.54599	1.50348e-06	2.18997e-05	yes	up
TRINITY_DN6877_c0_g2	------	2.3809	1.25151	1.63919e-06	2.36478e-05	yes	up
TRINITY_DN4649_c0_g1	------	2.78918	1.47984	1.69555e-06	2.42978e-05	yes	up
TRINITY_DN7161_c0_g1	------	2.57162	1.36268	1.85175e-06	2.62488e-05	yes	up
TRINITY_DN8195_c0_g1	------	2.1701	1.11776	1.87231e-06	2.64904e-05	yes	up
TRINITY_DN3813_c0_g1	------	2.1618	1.11223	2.1362e-06	2.96938e-05	yes	up
TRINITY_DN11723_c0_g1	------	2.57608	1.36518	2.22152e-06	3.07519e-05	yes	up
TRINITY_DN2721_c0_g1	------	2.79385	1.48226	2.29175e-06	3.15501e-05	yes	up
TRINITY_DN11373_c0_g2	------	2.59653	1.37659	2.40866e-06	3.29936e-05	yes	up
TRINITY_DN1329_c1_g1	------	3.51698	1.81434	2.67536e-06	3.60563e-05	yes	up
TRINITY_DN3244_c2_g2	------	2.74857	1.45868	3.21485e-06	4.25088e-05	yes	up
TRINITY_DN19444_c0_g1	------	13.8102	3.78766	3.52408e-06	4.60117e-05	yes	up
TRINITY_DN24151_c0_g1	------	2.28793	1.19404	3.52875e-06	4.60327e-05	yes	up
TRINITY_DN2757_c0_g1	------	2.21625	1.14812	4.07734e-06	5.23276e-05	yes	up
TRINITY_DN4841_c0_g1	------	2.15343	1.10663	4.65177e-06	5.86989e-05	yes	up
TRINITY_DN21727_c0_g1	------	2.13045	1.09116	5.11534e-06	6.36416e-05	yes	up
TRINITY_DN13705_c0_g1	------	3.98756	1.9955	5.98334e-06	7.31073e-05	yes	up
TRINITY_DN14925_c2_g2	------	2.40023	1.26317	7.36756e-06	8.71602e-05	yes	up
TRINITY_DN5466_c0_g3	------	15.0783	3.9144	8.49925e-06	9.92612e-05	yes	up
TRINITY_DN714_c0_g4	------	2.02906	1.02081	1.03449e-05	0.000118472	yes	up
TRINITY_DN21216_c0_g1	------	81.0433	6.34062	1.07953e-05	0.000123152	yes	up
TRINITY_DN25786_c0_g1	------	2.20208	1.13887	1.1219e-05	0.000127561	yes	up
TRINITY_DN15627_c0_g1	------	5.00004	2.32194	1.1372e-05	0.000128815	yes	up
TRINITY_DN15999_c0_g2	------	77.8904	6.28337	1.21009e-05	0.000135945	yes	up
TRINITY_DN4786_c1_g1	------	9.88847	3.30575	1.40031e-05	0.000154042	yes	up
TRINITY_DN6096_c0_g5	------	2.08542	1.06034	1.40426e-05	0.000154417	yes	up
TRINITY_DN22661_c0_g1	------	2.55112	1.35113	1.43056e-05	0.000156966	yes	up
TRINITY_DN15302_c1_g1	------	2.97297	1.5719	1.49554e-05	0.000163441	yes	up
TRINITY_DN2393_c0_g2	------	2.97844	1.57456	1.54926e-05	0.000168637	yes	up
TRINITY_DN2166_c0_g4	------	11.1175	3.47475	1.78661e-05	0.000190344	yes	up
TRINITY_DN20587_c0_g1	------	2.26101	1.17697	1.79446e-05	0.000191045	yes	up
TRINITY_DN4214_c0_g1	------	6.08555	2.60539	1.7988e-05	0.000191372	yes	up
TRINITY_DN13268_c0_g2	------	2.58377	1.36948	2.01381e-05	0.000210656	yes	up
TRINITY_DN20956_c0_g1	------	5.52583	2.46619	2.0717e-05	0.000215755	yes	up
TRINITY_DN4610_c0_g2	------	3.11134	1.63754	2.33938e-05	0.000239817	yes	up
TRINITY_DN15079_c0_g1	------	75.1303	6.23132	2.44441e-05	0.000248553	yes	up
TRINITY_DN5132_c1_g7	------	54.0482	5.75617	2.48219e-05	0.000251375	yes	up
TRINITY_DN576_c0_g2	------	2.27032	1.18289	2.6076e-05	0.000262749	yes	up
TRINITY_DN14006_c0_g1	------	17.8117	4.15476	2.65613e-05	0.000267014	yes	up
TRINITY_DN5744_c0_g1	------	2.62746	1.39367	2.91585e-05	0.000289451	yes	up
TRINITY_DN4487_c2_g2	------	2.19442	1.13384	2.99583e-05	0.000295813	yes	up
TRINITY_DN396_c0_g6	------	2.29009	1.1954	3.17563e-05	0.000311135	yes	up
TRINITY_DN6770_c0_g1	------	2.33943	1.22616	4.21004e-05	0.000398478	yes	up
TRINITY_DN3089_c0_g2	------	2.30392	1.20409	4.39855e-05	0.00041359	yes	up
TRINITY_DN10813_c0_g5	------	2.86538	1.51872	4.6641e-05	0.000434623	yes	up
TRINITY_DN8096_c0_g1	------	66.4298	6.05376	4.66948e-05	0.00043499	yes	up
TRINITY_DN21926_c0_g1	------	70.2332	6.13408	4.72303e-05	0.000439028	yes	up
TRINITY_DN2007_c1_g1	------	4.31116	2.10808	4.92901e-05	0.000455642	yes	up
TRINITY_DN20994_c0_g1	------	4.08133	2.02904	5.02696e-05	0.000463416	yes	up
TRINITY_DN5848_c0_g8	------	2.0137	1.00985	5.65624e-05	0.000512021	yes	up
TRINITY_DN10585_c0_g2	------	3.67754	1.87874	5.98703e-05	0.000538082	yes	up
TRINITY_DN17889_c0_g1	------	64.0326	6.00074	6.036e-05	0.000542101	yes	up
TRINITY_DN7367_c1_g1	------	62.2988	5.96113	7.5021e-05	0.000654895	yes	up
TRINITY_DN8272_c0_g3	------	2.18535	1.12786	7.69056e-05	0.000669406	yes	up
TRINITY_DN223_c0_g1	------	2.0903	1.06371	7.74583e-05	0.000672661	yes	up
TRINITY_DN2164_c0_g1	------	2.09763	1.06876	7.79279e-05	0.00067557	yes	up
TRINITY_DN9952_c0_g6	------	2.71897	1.44306	7.84039e-05	0.000678719	yes	up
TRINITY_DN8004_c0_g1	------	19.8321	4.30977	7.85706e-05	0.000679576	yes	up
TRINITY_DN9606_c0_g3	------	4.94076	2.30473	9.36263e-05	0.000788725	yes	up
TRINITY_DN11730_c0_g1	------	26.7019	4.73887	0.00012125	0.000987812	yes	up
TRINITY_DN1510_c1_g1	------	3.01046	1.58999	0.000122642	0.000997709	yes	up
TRINITY_DN6070_c0_g1	------	4.56814	2.19161	0.00013993	0.00111485	yes	up
TRINITY_DN13431_c0_g1	------	2.40071	1.26346	0.000140433	0.00111797	yes	up
TRINITY_DN6317_c0_g2	------	2.01702	1.01222	0.000147271	0.0011644	yes	up
TRINITY_DN10670_c0_g1	------	54.8075	5.7763	0.000157981	0.00123642	yes	up
TRINITY_DN14691_c0_g1	------	54.2578	5.76176	0.000164866	0.00128097	yes	up
TRINITY_DN6806_c0_g1	------	2.45571	1.29614	0.000165431	0.00128437	yes	up
TRINITY_DN12268_c0_g1	------	3.05733	1.61227	0.000173016	0.00133398	yes	up
TRINITY_DN5035_c1_g8	------	2.33243	1.22183	0.000177144	0.00136157	yes	up
TRINITY_DN1800_c0_g3	------	39.4606	5.30234	0.000193746	0.00146972	yes	up
TRINITY_DN13691_c0_g1	------	17.8131	4.15486	0.000197055	0.00149032	yes	up
TRINITY_DN7558_c0_g1	------	17.7731	4.15162	0.000205988	0.00154815	yes	up
TRINITY_DN4420_c0_g1	------	4.047	2.01685	0.000207653	0.00155941	yes	up
TRINITY_DN5466_c0_g1	------	2.15046	1.10464	0.000211847	0.00158743	yes	up
TRINITY_DN3220_c1_g1	------	2.44141	1.28771	0.000219357	0.00163516	yes	up
TRINITY_DN761_c0_g7	------	3.82178	1.93425	0.0002269	0.00168098	yes	up
TRINITY_DN7175_c0_g1	------	16.7535	4.06639	0.000227719	0.00168464	yes	up
TRINITY_DN2205_c0_g3	------	3.75626	1.9093	0.000250218	0.00182898	yes	up
TRINITY_DN9_c0_g3	------	3.271	1.70973	0.000250361	0.00182958	yes	up
TRINITY_DN11473_c0_g1	------	2.09739	1.06859	0.000278972	0.00200604	yes	up
TRINITY_DN7089_c1_g1	------	2.13497	1.09421	0.000281407	0.00202065	yes	up
TRINITY_DN6003_c0_g1	------	2.22895	1.15636	0.000299813	0.00212946	yes	up
TRINITY_DN27063_c0_g1	------	49.575	5.63154	0.000300532	0.00213305	yes	up
TRINITY_DN9031_c0_g1	------	2.01899	1.01364	0.000302182	0.00214376	yes	up
TRINITY_DN25027_c0_g1	------	49.4569	5.6281	0.00031032	0.00219682	yes	up
TRINITY_DN4229_c0_g1	------	2.33324	1.22234	0.000334095	0.00234092	yes	up
TRINITY_DN26524_c0_g1	------	49.7885	5.63774	0.000335248	0.0023479	yes	up
TRINITY_DN5107_c0_g6	------	2.3723	1.24628	0.000348789	0.00242693	yes	up
TRINITY_DN5631_c0_g2	------	2.12374	1.0866	0.00037696	0.00259062	yes	up
TRINITY_DN6920_c0_g2	------	49.8863	5.64057	0.000414543	0.00281132	yes	up
TRINITY_DN21678_c0_g1	------	3.0149	1.59211	0.000464259	0.00309966	yes	up
TRINITY_DN21017_c0_g1	------	3.43764	1.78142	0.000464515	0.00310034	yes	up
TRINITY_DN1503_c0_g1	------	2.1022	1.0719	0.000466732	0.00311238	yes	up
TRINITY_DN14929_c0_g1	------	2.2437	1.16588	0.000488471	0.00323655	yes	up
TRINITY_DN2328_c0_g7	------	2.62874	1.39437	0.000492352	0.00325868	yes	up
TRINITY_DN22510_c0_g1	------	4.18648	2.06574	0.00049258	0.00325947	yes	up
TRINITY_DN7252_c1_g3	------	2.13406	1.0936	0.00049485	0.00327234	yes	up
TRINITY_DN7060_c0_g1	------	4.25002	2.08747	0.000500763	0.00330491	yes	up
TRINITY_DN23717_c0_g1	------	4.41458	2.14227	0.000514283	0.00338227	yes	up
TRINITY_DN16822_c0_g1	------	2.78969	1.4801	0.000534526	0.00348949	yes	up
TRINITY_DN6524_c0_g1	------	9.31505	3.21956	0.000546534	0.0035522	yes	up
TRINITY_DN5908_c0_g4	------	2.6888	1.42696	0.000568699	0.00366725	yes	up
TRINITY_DN27147_c0_g1	------	2.2254	1.15406	0.000685414	0.00428093	yes	up
TRINITY_DN6767_c0_g1	------	2.04499	1.03209	0.000685595	0.00428093	yes	up
TRINITY_DN7955_c0_g2	------	5.75834	2.52565	0.000685619	0.00428093	yes	up
TRINITY_DN8160_c0_g3	------	2.98419	1.57734	0.000717849	0.00445162	yes	up
TRINITY_DN4074_c0_g3	------	6.39219	2.67631	0.000722616	0.00447573	yes	up
TRINITY_DN9591_c0_g6	------	2.50699	1.32595	0.00076012	0.00467532	yes	up
TRINITY_DN2938_c0_g3	------	2.22239	1.15212	0.000785888	0.00480632	yes	up
TRINITY_DN25810_c0_g1	------	6.11789	2.61303	0.000793305	0.00484185	yes	up
TRINITY_DN13907_c1_g2	------	42.3899	5.40565	0.000814903	0.00495058	yes	up
TRINITY_DN7706_c0_g1	------	9.55469	3.25621	0.000833582	0.00504349	yes	up
TRINITY_DN5466_c0_g4	------	42.8057	5.41973	0.000860628	0.00518209	yes	up
TRINITY_DN6621_c0_g2	------	3.18066	1.66933	0.000864127	0.0052003	yes	up
TRINITY_DN1125_c2_g1	------	2.39861	1.2622	0.000895244	0.00535865	yes	up
TRINITY_DN9891_c0_g1	------	2.35775	1.23741	0.000936286	0.00556559	yes	up
TRINITY_DN157_c0_g5	------	29.9944	4.90662	0.000993766	0.0058421	yes	up
TRINITY_DN14244_c0_g1	------	42.5318	5.41047	0.00100535	0.0058958	yes	up
TRINITY_DN5374_c0_g1	------	2.84647	1.50917	0.00109553	0.00634801	yes	up
TRINITY_DN5204_c0_g4	------	3.54047	1.82394	0.00112108	0.00648235	yes	up
TRINITY_DN6671_c0_g4	------	43.3581	5.43823	0.00112911	0.00652127	yes	up
TRINITY_DN7194_c0_g1	------	39.4487	5.30191	0.00125199	0.00709619	yes	up
TRINITY_DN14213_c0_g1	------	2.54198	1.34595	0.00129516	0.00730196	yes	up
TRINITY_DN26390_c0_g1	------	2.8102	1.49067	0.00138142	0.00770791	yes	up
TRINITY_DN4217_c0_g5	------	2.11858	1.0831	0.00139049	0.00775274	yes	up
TRINITY_DN6773_c0_g1	------	7.15085	2.83811	0.00153095	0.00839903	yes	up
TRINITY_DN1787_c0_g1	------	2.50269	1.32348	0.00153371	0.00841109	yes	up
TRINITY_DN700_c2_g6	------	39.5371	5.30514	0.00155438	0.00851361	yes	up
TRINITY_DN19222_c0_g1	------	2.96158	1.56637	0.00160878	0.00877327	yes	up
TRINITY_DN23769_c0_g1	------	37.3778	5.22411	0.00164881	0.00893975	yes	up
TRINITY_DN2715_c0_g2	------	4.43379	2.14854	0.00169787	0.00915138	yes	up
TRINITY_DN4669_c0_g1	------	2.26786	1.18133	0.00171393	0.00923294	yes	up
TRINITY_DN2024_c0_g3	------	2.12117	1.08486	0.00173825	0.00934223	yes	up
TRINITY_DN3232_c1_g1	------	3.8703	1.95245	0.00175743	0.00942007	yes	up
TRINITY_DN7286_c0_g2	------	2.46278	1.30029	0.00178764	0.00954972	yes	up
TRINITY_DN15441_c0_g2	------	39.8933	5.31808	0.00183003	0.00974391	yes	up
TRINITY_DN22921_c0_g1	------	38.075	5.25077	0.00183976	0.00978192	yes	up
TRINITY_DN24700_c0_g1	------	39.943	5.31987	0.00189062	0.0100181	yes	up
TRINITY_DN2720_c0_g4	------	2.10831	1.07609	0.00193523	0.0102167	yes	up
TRINITY_DN8119_c1_g2	------	6.61163	2.72501	0.00197264	0.0103815	yes	up
TRINITY_DN18296_c0_g1	------	2.3029	1.20345	0.0019876	0.0104383	yes	up
TRINITY_DN3107_c0_g1	------	2.07515	1.05322	0.00203952	0.010657	yes	up
TRINITY_DN10834_c0_g2	------	35.856	5.16414	0.00204439	0.010677	yes	up
TRINITY_DN14165_c0_g2	------	4.89924	2.29256	0.00205359	0.0107212	yes	up
TRINITY_DN1297_c0_g3	------	27.2229	4.76675	0.00205464	0.0107249	yes	up
TRINITY_DN13670_c0_g2	------	35.7381	5.15939	0.00209507	0.0108812	yes	up
TRINITY_DN700_c2_g2	------	14.2268	3.83054	0.00209875	0.0108928	yes	up
TRINITY_DN3216_c0_g6	------	2.6667	1.41506	0.00210276	0.0109061	yes	up
TRINITY_DN690_c0_g3	------	2.47355	1.30658	0.002105	0.0109158	yes	up
TRINITY_DN17259_c0_g1	------	13.1053	3.71207	0.00211146	0.0109361	yes	up
TRINITY_DN10625_c0_g2	------	2.08801	1.06213	0.00211332	0.010942	yes	up
TRINITY_DN17709_c0_g1	------	7.98118	2.9966	0.00215927	0.0111283	yes	up
TRINITY_DN6482_c0_g4	------	4.70969	2.23563	0.00217684	0.0111996	yes	up
TRINITY_DN16045_c0_g1	------	2.09848	1.06934	0.0022776	0.011605	yes	up
TRINITY_DN4340_c1_g2	------	2.71966	1.44343	0.00229801	0.0116991	yes	up
TRINITY_DN3638_c2_g1	------	2.06874	1.04875	0.00231041	0.0117523	yes	up
TRINITY_DN6308_c0_g6	------	3.5705	1.83612	0.00231142	0.0117555	yes	up
TRINITY_DN14538_c0_g2	------	2.98979	1.58005	0.00233526	0.0118618	yes	up
TRINITY_DN23919_c0_g1	------	2.29434	1.19808	0.00235237	0.0119314	yes	up
TRINITY_DN14658_c0_g1	------	8.34475	3.06087	0.00248059	0.0124621	yes	up
TRINITY_DN2_c0_g1	------	3.10216	1.63327	0.00248281	0.0124712	yes	up
TRINITY_DN15358_c0_g1	------	2.50211	1.32314	0.00251837	0.0126182	yes	up
TRINITY_DN13162_c0_g1	------	2.37716	1.24924	0.00252174	0.0126309	yes	up
TRINITY_DN16415_c0_g3	------	2.53607	1.34259	0.00261437	0.0130083	yes	up
TRINITY_DN7789_c0_g1	------	2.66316	1.41314	0.00290704	0.0142133	yes	up
TRINITY_DN18427_c0_g1	------	2.14174	1.09878	0.00290984	0.0142246	yes	up
TRINITY_DN6173_c3_g1	------	3.35182	1.74494	0.00293271	0.0143201	yes	up
TRINITY_DN14922_c0_g1	------	33.8698	5.08193	0.00297747	0.0144987	yes	up
TRINITY_DN8628_c0_g4	------	2.40089	1.26357	0.0030599	0.0148377	yes	up
TRINITY_DN2081_c0_g3	------	10.6816	3.41706	0.00321176	0.0154324	yes	up
TRINITY_DN8437_c0_g2	------	2.76987	1.46982	0.00321377	0.0154372	yes	up
TRINITY_DN5373_c1_g4	------	2.19683	1.13543	0.00323849	0.0155287	yes	up
TRINITY_DN4895_c0_g2	------	8.03294	3.00593	0.00327025	0.0156538	yes	up
TRINITY_DN12210_c0_g2	------	2.10101	1.07108	0.00338185	0.0161007	yes	up
TRINITY_DN2392_c0_g4	------	2.3337	1.22262	0.00339579	0.0161492	yes	up
TRINITY_DN2048_c0_g1	------	2.23167	1.15812	0.00341683	0.0162313	yes	up
TRINITY_DN25429_c0_g1	------	11.2914	3.49716	0.00342058	0.0162466	yes	up
TRINITY_DN16374_c0_g1	------	4.08017	2.02863	0.00345273	0.0163657	yes	up
TRINITY_DN8969_c0_g2	------	2.44329	1.28882	0.00351525	0.0165941	yes	up
TRINITY_DN14576_c0_g3	------	6.27451	2.6495	0.00352417	0.0166154	yes	up
TRINITY_DN24038_c0_g1	------	2.06765	1.04799	0.00354284	0.0166877	yes	up
TRINITY_DN11254_c0_g4	------	3.7547	1.9087	0.00366645	0.0171765	yes	up
TRINITY_DN7690_c0_g3	------	22.7748	4.50937	0.00380378	0.0176899	yes	up
TRINITY_DN9749_c0_g1	------	2.45335	1.29475	0.00380455	0.0176907	yes	up
TRINITY_DN3078_c0_g7	------	5.85507	2.54969	0.00384432	0.0178331	yes	up
TRINITY_DN13200_c0_g1	------	2.45654	1.29663	0.00387368	0.0179199	yes	up
TRINITY_DN868_c3_g1	------	22.779	4.50963	0.00388872	0.0179766	yes	up
TRINITY_DN10417_c0_g1	------	6.59218	2.72076	0.0038933	0.0179923	yes	up
TRINITY_DN8224_c0_g1	------	10.2871	3.36276	0.00390358	0.0180287	yes	up
TRINITY_DN9749_c0_g2	------	2.10476	1.07366	0.00398517	0.0183458	yes	up
TRINITY_DN5821_c2_g1	------	2.33463	1.22319	0.00405116	0.0185886	yes	up
TRINITY_DN10457_c0_g1	------	2.19897	1.13682	0.00417389	0.0190463	yes	up
TRINITY_DN7955_c0_g1	------	2.13181	1.09208	0.00420844	0.0191749	yes	up
TRINITY_DN17605_c0_g1	------	2.24171	1.1646	0.00425722	0.0193591	yes	up
TRINITY_DN99_c0_g1	------	2.38057	1.25131	0.0043422	0.0196867	yes	up
TRINITY_DN18346_c0_g1	------	4.58461	2.1968	0.00435287	0.0197225	yes	up
TRINITY_DN16313_c0_g2	------	7.23591	2.85518	0.00436333	0.019761	yes	up
TRINITY_DN14366_c0_g2	------	5.55325	2.47333	0.00442338	0.0199879	yes	up
TRINITY_DN11359_c0_g2	------	31.914	4.99612	0.00448269	0.0202086	yes	up
TRINITY_DN25887_c0_g1	------	3.0165	1.59287	0.00450131	0.02027	yes	up
TRINITY_DN4764_c0_g1	------	2.35229	1.23406	0.00452319	0.0203581	yes	up
TRINITY_DN11323_c1_g1	------	2.04363	1.03113	0.0045632	0.0205004	yes	up
TRINITY_DN6228_c0_g2	------	21.9324	4.45499	0.00459391	0.0206213	yes	up
TRINITY_DN19489_c0_g1	------	2.33647	1.22433	0.00459438	0.0206213	yes	up
TRINITY_DN5001_c0_g4	------	32.6378	5.02847	0.00463272	0.0207717	yes	up
TRINITY_DN14901_c0_g1	------	30.9619	4.95242	0.00464549	0.0208134	yes	up
TRINITY_DN16899_c0_g1	------	2.00881	1.00634	0.00466955	0.0208995	yes	up
TRINITY_DN11016_c0_g4	------	30.624	4.93659	0.00470844	0.0210392	yes	up
TRINITY_DN429_c0_g3	------	3.16141	1.66057	0.00471725	0.0210723	yes	up
TRINITY_DN11070_c0_g1	------	30.6321	4.93697	0.00484287	0.0215458	yes	up
TRINITY_DN13406_c0_g1	------	2.09038	1.06376	0.00485006	0.0215599	yes	up
TRINITY_DN14159_c3_g1	------	5.9402	2.57051	0.00491515	0.0217818	yes	up
TRINITY_DN7419_c1_g3	------	2.17017	1.11781	0.00497677	0.0220192	yes	up
TRINITY_DN10660_c0_g1	------	6.49282	2.69885	0.00501162	0.0221409	yes	up
TRINITY_DN5727_c2_g1	------	2.7348	1.45143	0.00517737	0.022743	yes	up
TRINITY_DN20069_c0_g1	------	2.11453	1.08034	0.00520021	0.0228233	yes	up
TRINITY_DN1924_c4_g1	------	8.51675	3.0903	0.00520502	0.0228344	yes	up
TRINITY_DN1369_c1_g2	------	2.81858	1.49497	0.00524128	0.0229601	yes	up
TRINITY_DN6200_c0_g1	------	4.20272	2.07132	0.00529984	0.0231694	yes	up
TRINITY_DN7734_c0_g2	------	3.45315	1.78791	0.00531242	0.0232176	yes	up
TRINITY_DN5107_c0_g7	------	4.29638	2.10312	0.00535098	0.0233556	yes	up
TRINITY_DN4741_c0_g2	------	2.3272	1.21859	0.00544689	0.0236816	yes	up
TRINITY_DN379_c0_g1	------	2.41252	1.27054	0.00556254	0.0241113	yes	up
TRINITY_DN22736_c0_g1	------	2.92247	1.54719	0.00556535	0.02412	yes	up
TRINITY_DN1032_c0_g1	------	2.06524	1.04631	0.0056509	0.0244275	yes	up
TRINITY_DN7845_c1_g2	------	30.7007	4.9402	0.00577665	0.0249067	yes	up
TRINITY_DN25975_c0_g1	------	5.72176	2.51646	0.0058032	0.0249818	yes	up
TRINITY_DN386_c0_g6	------	31.5555	4.97982	0.00599052	0.0256685	yes	up
TRINITY_DN5509_c0_g9	------	2.82383	1.49765	0.00609739	0.0260472	yes	up
TRINITY_DN13635_c0_g1	------	2.75555	1.46234	0.00622732	0.0264932	yes	up
TRINITY_DN11359_c0_g3	------	14.252	3.83309	0.00632582	0.0268364	yes	up
TRINITY_DN8813_c0_g2	------	2.63891	1.39994	0.0063271	0.026837	yes	up
TRINITY_DN2779_c0_g2	------	30.1704	4.91506	0.00637249	0.0270115	yes	up
TRINITY_DN8058_c0_g2	------	29.3232	4.87397	0.00638154	0.0270347	yes	up
TRINITY_DN25117_c0_g1	------	14.2798	3.8359	0.00640325	0.0271076	yes	up
TRINITY_DN22830_c0_g1	------	3.08717	1.62629	0.00650156	0.0274252	yes	up
TRINITY_DN6833_c0_g3	------	28.8906	4.85253	0.00669606	0.0280826	yes	up
TRINITY_DN5693_c0_g3	------	2.15714	1.10912	0.00669809	0.0280872	yes	up
TRINITY_DN6744_c0_g1	------	4.63786	2.21346	0.00684895	0.0286083	yes	up
TRINITY_DN9019_c0_g2	------	2.14616	1.10176	0.00721821	0.0298648	yes	up
TRINITY_DN7937_c0_g1	------	3.74431	1.9047	0.00758443	0.0310641	yes	up
TRINITY_DN3617_c0_g1	------	2.2467	1.1678	0.00760596	0.0311395	yes	up
TRINITY_DN9582_c0_g7	------	2.26144	1.17724	0.00775253	0.0316235	yes	up
TRINITY_DN876_c0_g1	------	2.2189	1.14985	0.00801248	0.0325077	yes	up
TRINITY_DN14562_c0_g1	------	13.3445	3.73817	0.00810076	0.0328084	yes	up
TRINITY_DN24760_c0_g1	------	27.2512	4.76825	0.00829589	0.0334189	yes	up
TRINITY_DN10738_c0_g2	------	27.2347	4.76737	0.00831468	0.0334766	yes	up
TRINITY_DN7444_c0_g1	------	4.20224	2.07116	0.00834138	0.0335483	yes	up
TRINITY_DN19616_c0_g1	------	19.2554	4.26719	0.00848654	0.0340139	yes	up
TRINITY_DN5377_c0_g2	------	2.84018	1.50598	0.00852366	0.0341355	yes	up
TRINITY_DN9579_c0_g2	------	2.16437	1.11395	0.00855784	0.034245	yes	up
TRINITY_DN14562_c0_g2	------	10.0073	3.32299	0.00861953	0.0344564	yes	up
TRINITY_DN25026_c0_g1	------	7.84415	2.97162	0.0086245	0.0344656	yes	up
TRINITY_DN23488_c0_g1	------	29.5006	4.88267	0.00871579	0.0347524	yes	up
TRINITY_DN4603_c1_g2	------	4.12302	2.0437	0.00886052	0.0352036	yes	up
TRINITY_DN12625_c0_g2	------	27.6937	4.79148	0.0089324	0.035433	yes	up
TRINITY_DN12662_c0_g2	------	9.5154	3.25026	0.00895859	0.0355229	yes	up
TRINITY_DN5077_c0_g1	------	3.59637	1.84654	0.00921361	0.0363619	yes	up
TRINITY_DN8814_c0_g1	------	5.5479	2.47194	0.00963272	0.0376701	yes	up
TRINITY_DN5423_c0_g1	------	31.2628	4.96637	0.00969199	0.0378478	yes	up
TRINITY_DN4197_c0_g2	------	2.02358	1.01691	0.00985157	0.038355	yes	up
TRINITY_DN25799_c0_g1	------	5.80736	2.53788	0.00989398	0.0384918	yes	up
TRINITY_DN13816_c1_g1	------	4.91611	2.29752	0.0100466	0.0389991	yes	up
TRINITY_DN2498_c0_g2	------	4.38469	2.13247	0.0102274	0.0395642	yes	up
TRINITY_DN12469_c1_g1	------	3.65539	1.87003	0.0102614	0.03967	yes	up
TRINITY_DN3467_c5_g1	------	2.21059	1.14443	0.0105301	0.0404956	yes	up
TRINITY_DN7010_c0_g2	------	3.0682	1.61739	0.010694	0.041015	yes	up
TRINITY_DN3847_c0_g4	------	25.7294	4.68535	0.010744	0.0411553	yes	up
TRINITY_DN9556_c0_g2	------	18.6415	4.22045	0.0107586	0.0411955	yes	up
TRINITY_DN19218_c0_g1	------	12.1419	3.60192	0.010869	0.0415178	yes	up
TRINITY_DN16416_c1_g3	------	3.78987	1.92215	0.0109311	0.0416704	yes	up
TRINITY_DN6804_c0_g4	------	25.8481	4.69199	0.0110257	0.0419993	yes	up
TRINITY_DN5559_c0_g1	------	2.90258	1.53734	0.0111324	0.0423362	yes	up
TRINITY_DN6176_c0_g2	------	2.33845	1.22555	0.0112975	0.0428774	yes	up
TRINITY_DN11097_c1_g1	------	3.13233	1.64724	0.0114699	0.0433671	yes	up
TRINITY_DN8941_c0_g1	------	2.08415	1.05946	0.0115064	0.0434771	yes	up
TRINITY_DN11266_c0_g6	------	18.4863	4.20839	0.0115075	0.0434771	yes	up
TRINITY_DN15074_c0_g1	------	25.3915	4.66628	0.0117511	0.0442161	yes	up
TRINITY_DN5350_c0_g1	------	25.9685	4.69869	0.0117536	0.0442183	yes	up
TRINITY_DN6499_c1_g2	------	7.096	2.827	0.0118448	0.0444946	yes	up
TRINITY_DN10263_c1_g1	------	18.1168	4.17926	0.0118617	0.0445415	yes	up
TRINITY_DN26900_c0_g1	------	26.7956	4.74392	0.0120337	0.0450467	yes	up
TRINITY_DN11721_c0_g2	------	2.40316	1.26493	0.0121192	0.0453219	yes	up
TRINITY_DN15627_c0_g2	------	3.33438	1.73742	0.0123458	0.0459748	yes	up
TRINITY_DN6640_c3_g1	------	12.6199	3.65763	0.0126878	0.0469236	yes	up
TRINITY_DN7835_c0_g2	------	2.82534	1.49843	0.0129488	0.0476778	yes	up
TRINITY_DN2645_c0_g9	------	3.00475	1.58724	0.0129899	0.0477909	yes	up
TRINITY_DN7193_c0_g2	------	11.9939	3.58423	0.0130537	0.0479676	yes	up
TRINITY_DN9381_c0_g1	------	2.05363	1.03817	0.0131974	0.0483685	yes	up
TRINITY_DN4326_c0_g3	------	2.26277	1.17809	0.0132384	0.0484952	yes	up
TRINITY_DN9630_c0_g1	------	3.62613	1.85843	0.0132636	0.0485698	yes	up
TRINITY_DN8296_c0_g1	------	12.3124	3.62204	0.0134884	0.0492373	yes	up
TRINITY_DN7695_c0_g4	------	3.37276	1.75393	0.0136247	0.0496372	yes	up
TRINITY_DN8606_c0_g1	------	3.28871	1.71752	0.0138933	0.0504036	yes	up
TRINITY_DN3607_c1_g3	------	3.75838	1.91011	0.0140737	0.0509659	yes	up
TRINITY_DN8737_c1_g1	------	8.5953	3.10355	0.0143702	0.0518526	yes	up
TRINITY_DN14284_c0_g1	------	25.3557	4.66424	0.0144471	0.052049	yes	up
TRINITY_DN4096_c0_g1	------	2.20473	1.1406	0.0144624	0.052098	yes	up
TRINITY_DN11837_c0_g1	------	24.09	4.59036	0.0145928	0.0524547	yes	up
TRINITY_DN2034_c0_g5	------	2.25608	1.17382	0.0146088	0.0524933	yes	up
TRINITY_DN4547_c0_g1	------	2.44737	1.29123	0.0146212	0.0525082	yes	up
TRINITY_DN4465_c0_g1	------	28.3703	4.82631	0.0146509	0.0525942	yes	up
TRINITY_DN7539_c0_g1	------	2.00452	1.00326	0.0147756	0.0529665	yes	up
TRINITY_DN15856_c1_g1	------	5.44524	2.445	0.014812	0.0530588	yes	up
TRINITY_DN140_c0_g4	------	24.0819	4.58988	0.0149049	0.0533155	yes	up
TRINITY_DN3370_c1_g2	------	2.43412	1.2834	0.0149978	0.0535841	yes	up
TRINITY_DN8291_c0_g2	------	23.9967	4.58476	0.015088	0.0538553	yes	up
TRINITY_DN12086_c0_g1	------	23.8536	4.57614	0.0151002	0.0538861	yes	up
TRINITY_DN15736_c0_g1	------	23.7603	4.57048	0.0153062	0.0544727	yes	up
TRINITY_DN2825_c0_g1	------	17.8288	4.15613	0.0153484	0.0546036	yes	up
TRINITY_DN13869_c0_g2	------	3.55716	1.83072	0.0155352	0.0551444	yes	up
TRINITY_DN9019_c0_g1	------	7.72227	2.94903	0.0155735	0.0552737	yes	up
TRINITY_DN13919_c3_g2	------	4.0243	2.00874	0.0161002	0.0567617	yes	up
TRINITY_DN16744_c2_g1	------	2.02099	1.01506	0.0161834	0.0569881	yes	up
TRINITY_DN7638_c0_g1	------	23.7681	4.57096	0.0162332	0.0570875	yes	up
TRINITY_DN12382_c0_g1	------	12.1539	3.60334	0.0162839	0.0572084	yes	up
TRINITY_DN26092_c0_g1	------	4.08325	2.02972	0.0163458	0.0573589	yes	up
TRINITY_DN17101_c0_g1	------	2.36265	1.24041	0.0164434	0.0575948	yes	up
TRINITY_DN5924_c0_g1	------	2.50116	1.3226	0.016486	0.0577163	yes	up
TRINITY_DN5455_c0_g1	------	16.6604	4.05835	0.016543	0.0578622	yes	up
TRINITY_DN6378_c0_g1	------	2.31087	1.20844	0.0168657	0.0587371	yes	up
TRINITY_DN9750_c0_g1	------	2.0323	1.02312	0.0168983	0.0588043	yes	up
TRINITY_DN12526_c0_g1	------	24.3235	4.60428	0.0170776	0.0592931	yes	up
TRINITY_DN15274_c0_g1	------	3.95876	1.98505	0.0170782	0.0592931	yes	up
TRINITY_DN12299_c0_g1	------	16.8334	4.07325	0.0171399	0.0594389	yes	up
TRINITY_DN13873_c0_g1	------	8.96725	3.16467	0.0174832	0.0603861	yes	up
TRINITY_DN4595_c0_g1	------	4.79916	2.26278	0.0176866	0.0609485	yes	up
TRINITY_DN108_c1_g1	------	3.17678	1.66757	0.0178688	0.0614641	yes	up
TRINITY_DN6308_c0_g3	------	2.97541	1.57309	0.0181352	0.0621954	yes	up
TRINITY_DN6462_c0_g1	------	11.2777	3.4954	0.0181473	0.0622264	yes	up
TRINITY_DN6041_c0_g1	------	2.16593	1.11499	0.0181619	0.0622515	yes	up
TRINITY_DN11859_c0_g1	------	2.67462	1.41933	0.0182159	0.0623762	yes	up
TRINITY_DN4989_c0_g1	------	2.91024	1.54114	0.0183701	0.0627386	yes	up
TRINITY_DN17841_c0_g1	------	10.8602	3.44097	0.0183844	0.0627598	yes	up
TRINITY_DN7643_c0_g3	------	23.4021	4.54857	0.0184451	0.0629318	yes	up
TRINITY_DN486_c0_g3	------	2.93434	1.55304	0.0185726	0.0632202	yes	up
TRINITY_DN23741_c0_g1	------	7.30688	2.86926	0.0186782	0.0635366	yes	up
TRINITY_DN12897_c1_g1	------	10.9126	3.44792	0.0187134	0.0636278	yes	up
TRINITY_DN8108_c0_g2	------	4.70887	2.23538	0.0190435	0.0645096	yes	up
TRINITY_DN9570_c0_g4	------	6.82746	2.77135	0.0190546	0.0645256	yes	up
TRINITY_DN3350_c1_g2	------	2.11785	1.0826	0.0190801	0.0645901	yes	up
TRINITY_DN4438_c0_g2	------	2.00463	1.00333	0.0193162	0.0652354	yes	up
TRINITY_DN22563_c0_g1	------	22.3568	4.48264	0.019683	0.0662438	yes	up
TRINITY_DN7419_c0_g1	------	2.44598	1.29041	0.0197171	0.0663138	yes	up
TRINITY_DN3268_c1_g1	------	3.20353	1.67966	0.0197858	0.0665006	yes	up
TRINITY_DN7373_c1_g1	------	3.71908	1.89495	0.0200263	0.0671044	yes	up
TRINITY_DN21007_c0_g1	------	16.5388	4.04778	0.0203867	0.0680999	yes	up
TRINITY_DN572_c0_g3	------	22.4763	4.49033	0.020566	0.0685413	yes	up
TRINITY_DN4353_c0_g6	------	2.02663	1.01908	0.0207225	0.0689255	yes	up
TRINITY_DN7925_c0_g1	------	3.6977	1.88663	0.0208412	0.0692361	yes	up
TRINITY_DN1744_c0_g2	------	2.47521	1.30755	0.021073	0.0698522	yes	up
TRINITY_DN6057_c0_g1	------	3.74781	1.90605	0.0211273	0.0699935	yes	up
TRINITY_DN2720_c0_g2	------	25.342	4.66346	0.0217021	0.0713949	yes	up
TRINITY_DN8976_c0_g1	------	21.9937	4.45902	0.0217158	0.0714243	yes	up
TRINITY_DN12927_c0_g2	------	5.49666	2.45855	0.02198	0.0721751	yes	up
TRINITY_DN4983_c2_g2	------	2.32044	1.2144	0.0219857	0.072179	yes	up
TRINITY_DN16652_c0_g1	------	3.33954	1.73965	0.0221296	0.0725788	yes	up
TRINITY_DN11208_c0_g2	------	7.92094	2.98567	0.0222697	0.0729493	yes	up
[truncated: 1,801 more rows]
