# Supplementary material for: Transcriptomic sequencing reveals the response of Dunaliella salina to copper stress via the increased photosynthesis and carbon mechanism
Source: Royal Society of Chemistry journal article supplement (doi:10.1039/d1mo00125f), 2021-06-24
Supplement: d1mo00125f3.xlsx [file d1mo00125f3.xlsx]

## Sheet: GO enrichment
GO enrichmet analysis of the DEGs in the transcriptome of D. salina in response to copper stress
Term Type	Description	GO ID	Number	Ratio	P-value
CC	cellular_component	GO:0005575	1365	1365/1719	0.0335843
CC	membrane part	GO:0044425	845	845/1719	0.000102084
CC	integral component of membrane	GO:0016021	812	812/1719	5.45745e-05
CC	intrinsic component of membrane	GO:0031224	812	812/1719	6.10289e-05
CC	intracellular membrane-bounded organelle	GO:0043231	455	455/1719	0.00335082
CC	membrane-bounded organelle	GO:0043227	455	455/1719	0.0037027
CC	plastid	GO:0009536	129	129/1719	4.31223e-06
CC	chloroplast	GO:0009507	122	122/1719	5.16826e-06
CC	chromosomal part	GO:0044427	59	59/1719	0.00113478
CC	thylakoid membrane	GO:0042651	48	48/1719	0.000897208
CC	photosynthetic membrane	GO:0034357	48	48/1719	0.000897208
CC	chloroplast thylakoid membrane	GO:0009535	47	47/1719	0.000661499
CC	plastid thylakoid membrane	GO:0055035	47	47/1719	0.000661499
CC	nuclear chromosome part	GO:0044454	30	30/1719	0.00321469
CC	extracellular region	GO:0005576	25	25/1719	0.038393
CC	photosystem II	GO:0009523	12	12/1719	0.0427831
CC	kinesin complex	GO:0005871	11	11/1719	0.0223199
CC	proton-transporting two-sector ATPase complex, catalytic domain	GO:0033178	11	11/1719	0.0458692
CC	retrotransposon nucleocapsid	GO:0000943	10	10/1719	0.000400519
CC	proton-transporting ATP synthase complex, catalytic core F(1)	GO:0045261	9	9/1719	0.0141376
CC	cell cortex part	GO:0044448	8	8/1719	0.0253533
CC	MCM complex	GO:0042555	7	7/1719	0.0284652
CC	origin recognition complex	GO:0000808	6	6/1719	0.0259324
CC	RIC1-RGP1 guanyl-nucleotide exchange factor complex	GO:0034066	5	5/1719	0.00606542
CC	guanyl-nucleotide exchange factor complex	GO:0032045	5	5/1719	0.00606542
CC	epsilon DNA polymerase complex	GO:0008622	5	5/1719	0.0119761
CC	nuclear origin of replication recognition complex	GO:0005664	5	5/1719	0.0160306
CC	kinetochore	GO:0000776	5	5/1719	0.0209045
CC	condensed nuclear chromosome kinetochore	GO:0000778	4	4/1719	0.000434412
CC	BRCA1-A complex	GO:0070531	4	4/1719	0.000434412
CC	condensed chromosome kinetochore	GO:0000777	4	4/1719	0.00120099
CC	Smc5-Smc6 complex	GO:0030915	4	4/1719	0.0244354
CC	multivesicular body	GO:0005771	4	4/1719	0.0244354
CC	amyloplast	GO:0009501	4	4/1719	0.0325998
CC	GINS complex	GO:0000811	4	4/1719	0.0421685
CC	IRE1-TRAF2-ASK1 complex	GO:1990604	3	3/1719	0.00354808
CC	cortical microtubule, transverse to long axis	GO:0010005	3	3/1719	0.00821857
CC	Ndc80 complex	GO:0031262	3	3/1719	0.00821857
CC	photosystem II reaction center	GO:0009539	3	3/1719	0.0152361
CC	Arp2/3 protein complex	GO:0005885	3	3/1719	0.0152361
CC	ribonuclease H2 complex	GO:0032299	3	3/1719	0.0247258
CC	cortical microtubule	GO:0055028	3	3/1719	0.0247258
CC	BRCA1-BARD1 complex	GO:0031436	2	2/1719	0.00972141
CC	endocytic patch	GO:0061645	2	2/1719	0.00972141
CC	actin cortical patch	GO:0030479	2	2/1719	0.00972141
CC	mitochondrial ribosome	GO:0005761	2	2/1719	0.0272487
CC	BRISC complex	GO:0070552	2	2/1719	0.0272487
CC	organellar ribosome	GO:0000313	2	2/1719	0.0272487
BP	single-organism process	GO:0044699	700	700/1719	0.0119305
BP	single-organism cellular process	GO:0044763	601	601/1719	0.0134255
BP	single-organism metabolic process	GO:0044710	461	461/1719	0.0488228
BP	DNA metabolic process	GO:0006259	194	194/1719	4.97683e-06
BP	response to stimulus	GO:0050896	178	178/1719	0.0323052
BP	response to stress	GO:0006950	153	153/1719	0.00499976
BP	cellular response to stimulus	GO:0051716	128	128/1719	0.00011767
BP	cellular response to stress	GO:0033554	126	126/1719	3.13781e-05
BP	carbohydrate metabolic process	GO:0005975	124	124/1719	0.0174651
BP	cellular response to DNA damage stimulus	GO:0006974	99	99/1719	0.000679404
BP	regulation of nucleobase-containing compound metabolic process	GO:0019219	97	97/1719	0.0161664
BP	DNA repair	GO:0006281	92	92/1719	0.00116758
BP	single-organism carbohydrate metabolic process	GO:0044723	80	80/1719	0.00515254
BP	transmembrane transport	GO:0055085	76	76/1719	0.00651246
BP	cell cycle process	GO:0022402	65	65/1719	1.66734e-06
BP	chromosome organization	GO:0051276	57	57/1719	2.19089e-06
BP	oxidation-reduction process	GO:0055114	46	46/1719	0.0362795
BP	DNA replication	GO:0006260	45	45/1719	0.000115165
BP	mitotic cell cycle process	GO:1903047	34	34/1719	2.63962e-06
BP	DNA recombination	GO:0006310	33	33/1719	0.00700465
BP	carbohydrate biosynthetic process	GO:0016051	29	29/1719	0.00213492
BP	regulation of cellular component organization	GO:0051128	29	29/1719	0.0289686
BP	cell division	GO:0051301	28	28/1719	0.0016866
BP	porphyrin-containing compound metabolic process	GO:0006778	28	28/1719	0.0180982
BP	transcription, DNA-templated	GO:0006351	28	28/1719	0.0367209
BP	nucleic acid-templated transcription	GO:0097659	28	28/1719	0.0367209
BP	pigment metabolic process	GO:0042440	27	27/1719	0.0324406
BP	chromatin modification	GO:0016568	26	26/1719	0.042905
BP	regulation of organelle organization	GO:0033043	25	25/1719	0.0139375
BP	pigment biosynthetic process	GO:0046148	24	24/1719	0.0194118
BP	porphyrin-containing compound biosynthetic process	GO:0006779	23	23/1719	0.0244245
BP	cell cycle checkpoint	GO:0000075	21	21/1719	8.38428e-05
BP	covalent chromatin modification	GO:0016569	20	20/1719	0.0339115
BP	histone modification	GO:0016570	19	19/1719	0.0484154
BP	telomere organization	GO:0032200	18	18/1719	4.80363e-05
BP	telomere maintenance	GO:0000723	18	18/1719	4.80363e-05
BP	anatomical structure homeostasis	GO:0060249	18	18/1719	4.80363e-05
BP	DNA integrity checkpoint	GO:0031570	18	18/1719	0.000135172
BP	chlorophyll metabolic process	GO:0015994	17	17/1719	0.00573685
BP	regulation of cell cycle process	GO:0010564	16	16/1719	0.0203963
BP	DNA damage checkpoint	GO:0000077	15	15/1719	0.000971664
BP	protein-DNA complex subunit organization	GO:0071824	15	15/1719	0.00333136
BP	sister chromatid cohesion	GO:0007062	14	14/1719	0.00146832
BP	DNA replication initiation	GO:0006270	14	14/1719	0.00400789
BP	steroid metabolic process	GO:0008202	13	13/1719	0.000360575
BP	regulation of chromosome organization	GO:0033044	13	13/1719	0.0031153
BP	protein-DNA complex assembly	GO:0065004	13	13/1719	0.00605918
BP	positive regulation of cellular component organization	GO:0051130	13	13/1719	0.00644118
BP	negative regulation of cellular component organization	GO:0051129	13	13/1719	0.0206862
BP	negative regulation of organelle organization	GO:0010639	13	13/1719	0.0206862
BP	double-strand break repair via homologous recombination	GO:0000724	13	13/1719	0.0468037
BP	steroid biosynthetic process	GO:0006694	12	12/1719	0.000423387
BP	meiotic cell cycle process	GO:1903046	12	12/1719	0.00337245
BP	chlorophyll biosynthetic process	GO:0015995	12	12/1719	0.011322
BP	mismatch repair	GO:0006298	12	12/1719	0.0183348
BP	protein-chromophore linkage	GO:0018298	11	11/1719	0.0223199
BP	oligosaccharide metabolic process	GO:0009311	11	11/1719	0.043943
BP	sterol metabolic process	GO:0016125	10	10/1719	0.00121205
BP	regulation of DNA metabolic process	GO:0051052	10	10/1719	0.0364869
BP	histone phosphorylation	GO:0016572	9	9/1719	1.83803e-05
BP	response to ionizing radiation	GO:0010212	9	9/1719	0.00040757
BP	sterol biosynthetic process	GO:0016126	9	9/1719	0.0018141
BP	fucose metabolic process	GO:0006004	9	9/1719	0.0018141
BP	positive regulation of organelle organization	GO:0010638	9	9/1719	0.00463818
BP	mitotic sister chromatid cohesion	GO:0007064	9	9/1719	0.0141376
BP	tetraterpenoid metabolic process	GO:0016108	9	9/1719	0.0337787
BP	carotenoid metabolic process	GO:0016116	9	9/1719	0.0337787
BP	amino sugar metabolic process	GO:0006040	9	9/1719	0.045458
BP	chromatin assembly or disassembly	GO:0006333	8	8/1719	0.00152556
BP	regulation of chromatin modification	GO:1903308	8	8/1719	0.00352353
BP	regulation of chromatin organization	GO:1902275	8	8/1719	0.00352353
BP	benzene-containing compound metabolic process	GO:0042537	8	8/1719	0.00878014
BP	chitin metabolic process	GO:0006030	8	8/1719	0.0129525
BP	photosynthetic electron transport chain	GO:0009767	8	8/1719	0.0155108
BP	nucleosome organization	GO:0034728	8	8/1719	0.0216892
BP	aminoglycan metabolic process	GO:0006022	8	8/1719	0.0216892
BP	glucosamine-containing compound metabolic process	GO:1901071	8	8/1719	0.0253533
BP	photosynthesis, dark reaction	GO:0019685	7	7/1719	0.00403551
BP	tryptophan catabolic process to kynurenine	GO:0019441	7	7/1719	0.00531443
BP	negative regulation of chromosome organization	GO:2001251	7	7/1719	0.00687456
BP	kynurenine metabolic process	GO:0070189	7	7/1719	0.0109752
BP	response to endoplasmic reticulum stress	GO:0034976	7	7/1719	0.0135833
BP	indole-containing compound catabolic process	GO:0042436	7	7/1719	0.0135833
BP	indolalkylamine catabolic process	GO:0046218	7	7/1719	0.0135833
BP	tryptophan catabolic process	GO:0006569	7	7/1719	0.0135833
BP	cellular biogenic amine catabolic process	GO:0042402	7	7/1719	0.0200761
BP	amine catabolic process	GO:0009310	7	7/1719	0.0200761
BP	regulation of gene silencing	GO:0060968	7	7/1719	0.0240202
BP	actin filament organization	GO:0007015	7	7/1719	0.0284652
BP	regulation of cell cycle G2/M phase transition	GO:1902749	6	6/1719	0.0134877
BP	chromosome segregation	GO:0007059	6	6/1719	0.0134877
BP	nucleosome assembly	GO:0006334	6	6/1719	0.0313584
BP	regulation of generation of precursor metabolites and energy	GO:0043467	6	6/1719	0.0374734
BP	attachment of spindle microtubules to kinetochore	GO:0008608	5	5/1719	0.000164302
BP	positive regulation of histone modification	GO:0031058	5	5/1719	0.000831763
BP	positive regulation of chromatin modification	GO:1903310	5	5/1719	0.000831763
BP	DNA replication-independent nucleosome organization	GO:0034724	5	5/1719	0.00257564
BP	nuclear chromosome segregation	GO:0098813	5	5/1719	0.00405914
BP	negative regulation of protein modification process	GO:0031400	5	5/1719	0.00867818
BP	integrin-mediated signaling pathway	GO:0007229	5	5/1719	0.0119761
BP	multicellular organism development	GO:0007275	5	5/1719	0.0119761
BP	double-strand break repair via break-induced replication	GO:0000727	5	5/1719	0.0160306
BP	regulation of anatomical structure size	GO:0090066	5	5/1719	0.0160306
BP	positive regulation of chromosome organization	GO:2001252	5	5/1719	0.0160306
BP	regulation of cellular component size	GO:0032535	5	5/1719	0.0160306
BP	regulation of histone modification	GO:0031056	5	5/1719	0.0209045
BP	deoxyribonucleotide biosynthetic process	GO:0009263	5	5/1719	0.0209045
BP	positive regulation of protein polymerization	GO:0032273	5	5/1719	0.0209045
BP	post-chaperonin tubulin folding pathway	GO:0007023	5	5/1719	0.0266507
BP	regulation of G2/M transition of mitotic cell cycle	GO:0010389	5	5/1719	0.0266507
BP	endoplasmic reticulum unfolded protein response	GO:0030968	5	5/1719	0.0266507
BP	regulation of protein polymerization	GO:0032271	5	5/1719	0.0266507
BP	tubulin complex assembly	GO:0007021	5	5/1719	0.0333114
BP	regulation of DNA replication	GO:0006275	5	5/1719	0.0333114
BP	response to hydrogen peroxide	GO:0042542	5	5/1719	0.0409178
BP	glycine biosynthetic process from serine	GO:0019264	5	5/1719	0.0409178
BP	attachment of mitotic spindle microtubules to kinetochore	GO:0051315	4	4/1719	0.000434412
BP	regulation of RNA interference	GO:1900368	4	4/1719	0.00258324
BP	negative regulation of chromatin modification	GO:1903309	4	4/1719	0.00790993
BP	actin nucleation	GO:0045010	4	4/1719	0.00790993
BP	positive regulation of actin filament polymerization	GO:0030838	4	4/1719	0.00790993
BP	DNA replication-independent nucleosome assembly	GO:0006336	4	4/1719	0.00790993
BP	regulation of actin filament length	GO:0030832	4	4/1719	0.0121642
BP	regulation of actin filament polymerization	GO:0030833	4	4/1719	0.0121642
BP	regulation of gene silencing by RNA	GO:0060966	4	4/1719	0.0121642
BP	DNA replication checkpoint	GO:0000076	4	4/1719	0.0121642
BP	cell cycle DNA replication	GO:0044786	4	4/1719	0.0121642
BP	regulation of actin polymerization or depolymerization	GO:0008064	4	4/1719	0.0121642
BP	photosynthetic electron transport in photosystem II	GO:0009772	4	4/1719	0.0121642
BP	pre-replicative complex assembly	GO:0036388	4	4/1719	0.0244354
BP	pre-replicative complex assembly involved in cell cycle DNA replication	GO:1902299	4	4/1719	0.0244354
BP	regulation of actin cytoskeleton organization	GO:0032956	4	4/1719	0.0244354
BP	regulation of actin filament-based process	GO:0032970	4	4/1719	0.0244354
BP	pre-replicative complex assembly involved in nuclear cell cycle DNA replication	GO:0006267	4	4/1719	0.0244354
BP	reciprocal DNA recombination	GO:0035825	4	4/1719	0.0325998
BP	reciprocal meiotic recombination	GO:0007131	4	4/1719	0.0325998
BP	positive regulation of cytoskeleton organization	GO:0051495	4	4/1719	0.0325998
BP	polyketide metabolic process	GO:0030638	4	4/1719	0.0421685
BP	regulation of double-strand break repair via homologous recombination	GO:0010569	3	3/1719	0.00354808
BP	negative regulation of histone modification	GO:0031057	3	3/1719	0.00354808
BP	intrinsic apoptotic signaling pathway in response to endoplasmic reticulum stress	GO:0070059	3	3/1719	0.00354808
BP	negative regulation of protein acetylation	GO:1901984	3	3/1719	0.00354808
BP	negative regulation of peptidyl-lysine acetylation	GO:2000757	3	3/1719	0.00354808
BP	meiotic chromosome segregation	GO:0045132	3	3/1719	0.00354808
BP	apoptotic signaling pathway	GO:0097190	3	3/1719	0.00354808
BP	intrinsic apoptotic signaling pathway	GO:0097193	3	3/1719	0.00354808
BP	negative regulation of histone acetylation	GO:0035067	3	3/1719	0.00354808
BP	IRE1-mediated unfolded protein response	GO:0036498	3	3/1719	0.00354808
BP	response to potassium ion	GO:0035864	3	3/1719	0.00821857
BP	RNA fragment catabolic process	GO:0000292	3	3/1719	0.00821857
BP	regulation of production of siRNA involved in RNA interference	GO:0090065	3	3/1719	0.00821857
BP	regulation of wax biosynthetic process	GO:1904276	3	3/1719	0.00821857
BP	positive regulation of wax biosynthetic process	GO:1904278	3	3/1719	0.00821857
BP	nuclear-transcribed mRNA catabolic process, 3'-5' exonucleolytic nonsense-mediated decay	GO:0070478	3	3/1719	0.00821857
BP	Arp2/3 complex-mediated actin nucleation	GO:0034314	3	3/1719	0.0152361
BP	light-independent chlorophyll biosynthetic process	GO:0036068	3	3/1719	0.0152361
BP	regulation of double-strand break repair	GO:2000779	3	3/1719	0.0152361
BP	regulation of fatty acid biosynthetic process	GO:0042304	3	3/1719	0.0247258
BP	regulation of protein acetylation	GO:1901983	3	3/1719	0.0247258
BP	positive regulation of histone methylation	GO:0031062	3	3/1719	0.0247258
BP	regulation of peptidyl-lysine acetylation	GO:2000756	3	3/1719	0.0247258
BP	regulation of histone acetylation	GO:0035065	3	3/1719	0.0247258
BP	spermidine metabolic process	GO:0008216	3	3/1719	0.0367029
BP	spermidine biosynthetic process	GO:0008295	3	3/1719	0.0367029
BP	regulation of production of small RNA involved in gene silencing by RNA	GO:0070920	3	3/1719	0.0367029
BP	negative regulation of fatty acid biosynthetic process	GO:0045717	2	2/1719	0.00972141
BP	negative regulation of fatty acid metabolic process	GO:0045922	2	2/1719	0.00972141
BP	multidimensional cell growth	GO:0009825	2	2/1719	0.00972141
BP	positive regulation of cell cycle arrest	GO:0071158	2	2/1719	0.00972141
BP	regulation of cell cycle arrest	GO:0071156	2	2/1719	0.00972141
BP	positive regulation of protein acetylation	GO:1901985	2	2/1719	0.00972141
BP	positive regulation of peptidyl-lysine acetylation	GO:2000758	2	2/1719	0.00972141
BP	positive regulation of histone acetylation	GO:0035066	2	2/1719	0.00972141
BP	nuclear DNA replication	GO:0033260	2	2/1719	0.0272487
BP	histone monoubiquitination	GO:0010390	2	2/1719	0.0272487
BP	maintenance of mitotic sister chromatid cohesion	GO:0034088	2	2/1719	0.0272487
BP	histone ubiquitination	GO:0016574	2	2/1719	0.0272487
BP	meiotic DNA double-strand break formation	GO:0042138	2	2/1719	0.0272487
BP	maintenance of sister chromatid cohesion	GO:0034086	2	2/1719	0.0272487
BP	regulation of apoptotic process	GO:0042981	2	2/1719	0.0272487
BP	negative regulation of apoptotic process	GO:0043066	2	2/1719	0.0272487
BP	cellular response to misfolded protein	GO:0071218	2	2/1719	0.0272487
BP	DNA replication, synthesis of RNA primer	GO:0006269	2	2/1719	0.0272487
MF	ion binding	GO:0043167	796	796/1719	0.00120455
MF	transferase activity	GO:0016740	563	563/1719	0.00500443
MF	carbohydrate derivative binding	GO:0097367	484	484/1719	0.0145541
MF	nucleoside binding	GO:0001882	468	468/1719	0.0301231
MF	ribonucleoside binding	GO:0032549	467	467/1719	0.0322841
MF	adenyl nucleotide binding	GO:0030554	433	433/1719	0.0216774
MF	ATP binding	GO:0005524	430	430/1719	0.027185
MF	adenyl ribonucleotide binding	GO:0032559	430	430/1719	0.0272041
MF	cation binding	GO:0043169	405	405/1719	0.0200231
MF	metal ion binding	GO:0046872	402	402/1719	0.0180701
MF	DNA binding	GO:0003677	226	226/1719	6.92344e-06
MF	transferase activity, transferring glycosyl groups	GO:0016757	76	76/1719	0.031365
MF	nucleotidyltransferase activity	GO:0016779	70	70/1719	0.00219262
MF	serine-type peptidase activity	GO:0008236	60	60/1719	0.0330446
MF	serine hydrolase activity	GO:0017171	60	60/1719	0.0330446
MF	cytoskeletal protein binding	GO:0008092	47	47/1719	0.0123779
MF	tetrapyrrole binding	GO:0046906	44	44/1719	0.0161044
MF	tubulin binding	GO:0015631	39	39/1719	0.0085559
MF	microtubule binding	GO:0008017	29	29/1719	0.0315844
MF	RNA polymerase activity	GO:0034062	28	28/1719	0.000217217
MF	double-stranded DNA binding	GO:0003690	27	27/1719	0.0141162
MF	DNA-directed RNA polymerase activity	GO:0003899	26	26/1719	0.000508172
MF	protein methyltransferase activity	GO:0008276	26	26/1719	0.0106706
MF	oxidoreductase activity, acting on a sulfur group of donors	GO:0016667	26	26/1719	0.0439402
MF	N-methyltransferase activity	GO:0008170	25	25/1719	0.0222806
MF	UDP-glycosyltransferase activity	GO:0008194	24	24/1719	0.00280989
MF	histone methyltransferase activity	GO:0042054	22	22/1719	4.66881e-05
MF	lysine N-methyltransferase activity	GO:0016278	22	22/1719	0.00273223
MF	protein-lysine N-methyltransferase activity	GO:0016279	22	22/1719	0.00273223
MF	histone-lysine N-methyltransferase activity	GO:0018024	21	21/1719	2.68779e-05
MF	DNA helicase activity	GO:0003678	20	20/1719	0.00936104
MF	RNA-directed DNA polymerase activity	GO:0003964	14	14/1719	0.0148228
MF	acetylglucosaminyltransferase activity	GO:0008375	13	13/1719	0.00752607
MF	mismatched DNA binding	GO:0030983	11	11/1719	0.043943
MF	oxidoreductase activity, acting on the CH-NH2 group of donors	GO:0016638	10	10/1719	0.0222821
MF	chlorophyll binding	GO:0016168	10	10/1719	0.0332617
MF	proton-transporting ATP synthase activity, rotational mechanism	GO:0046933	10	10/1719	0.0332617
MF	oxidoreductase activity, acting on a sulfur group of donors, disulfide as acceptor	GO:0016671	8	8/1719	0.0253533
MF	protein self-association	GO:0043621	7	7/1719	0.00107089
MF	3'-5' DNA helicase activity	GO:0043138	7	7/1719	0.00687456
MF	thiolester hydrolase activity	GO:0016790	7	7/1719	0.0284652
MF	alditol:NADP+ 1-oxidoreductase activity	GO:0004032	6	6/1719	0.00208242
MF	alcohol dehydrogenase (NADP+) activity	GO:0008106	6	6/1719	0.00208242
MF	aldo-keto reductase (NADP) activity	GO:0004033	6	6/1719	0.00596433
MF	ATP-dependent 3'-5' DNA helicase activity	GO:0043140	6	6/1719	0.0134877
MF	DNA replication origin binding	GO:0003688	6	6/1719	0.0442991
MF	efflux transmembrane transporter activity	GO:0015562	5	5/1719	0.000831763
MF	electron transporter, transferring electrons within the cyclic electron transport pathway of photosynthesis activity	GO:0045156	5	5/1719	0.000831763
MF	S-methyltransferase activity	GO:0008172	5	5/1719	0.0209045
MF	glycine hydroxymethyltransferase activity	GO:0004372	5	5/1719	0.0409178
MF	heme-copper terminal oxidase activity	GO:0015002	5	5/1719	0.0494897
MF	cytochrome-c oxidase activity	GO:0004129	5	5/1719	0.0494897
MF	oxidoreductase activity, acting on a heme group of donors, oxygen as acceptor	GO:0016676	5	5/1719	0.0494897
MF	oxidoreductase activity, acting on a heme group of donors	GO:0016675	5	5/1719	0.0494897
MF	insulin-like growth factor binding	GO:0005520	4	4/1719	9.43076e-05
MF	Lys48-specific deubiquitinase activity	GO:1990380	4	4/1719	0.00120099
MF	arylformamidase activity	GO:0004061	4	4/1719	0.00476408
MF	growth factor binding	GO:0019838	4	4/1719	0.0176433
MF	DNA-methyltransferase activity	GO:0009008	4	4/1719	0.0421685
MF	chlorophyllase activity	GO:0047746	4	4/1719	0.0421685
MF	oxidoreductase activity, acting on the CH-CH group of donors, iron-sulfur protein as acceptor	GO:0016636	3	3/1719	0.0247258
MF	phosphatidate phosphatase activity	GO:0008195	3	3/1719	0.0247258
MF	geranyltranstransferase activity	GO:0004337	3	3/1719	0.0247258
MF	glutathione synthase activity	GO:0004363	3	3/1719	0.0247258
MF	argininosuccinate lyase activity	GO:0004056	3	3/1719	0.0367029
MF	peroxisome targeting sequence binding	GO:0000268	2	2/1719	0.0272487
MF	sarcosine oxidase activity	GO:0008115	2	2/1719	0.0272487
MF	sterol 14-demethylase activity	GO:0008398	2	2/1719	0.0272487
MF	oxoglutarate dehydrogenase (succinyl-transferring) activity	GO:0004591	2	2/1719	0.0272487
MF	molybdopterin molybdotransferase activity	GO:0061599	2	2/1719	0.0272487
MF	molybdopterin adenylyltransferase activity	GO:0061598	2	2/1719	0.0272487
MF	peroxisome matrix targeting signal-1 binding	GO:0005052	2	2/1719	0.0272487
