# Supplementary material for: Transcriptomic sequencing reveals the response of Dunaliella salina to copper stress via the increased photosynthesis and carbon mechanism
Source: Royal Society of Chemistry journal article supplement (doi:10.1039/d1mo00125f), 2021-06-24
Supplement: d1mo00125f4.xlsx [file d1mo00125f4.xlsx]

## Sheet: Sheet1
KEGG enrichment analysis of the DEGs in the transcriptome of D. salina in response to copper stress
First Category	Second Category	pathway ID	Description	DEGs	Ratio	P-value
Metabolism	Nucleotide metabolism	map00240	Pyrimidine metabolism	39	39/984	0.0275492
Metabolism	Nucleotide metabolism	map00230	Purine metabolism	39	39/984	6.74314e-05
Genetic Information Processing	Translation	map03010	Ribosome	32	32/984	0.0213528
Genetic Information Processing	Replication and repair	map03440	Homologous recombination	26	26/984	5.68091e-05
Genetic Information Processing	Replication and repair	map03030	DNA replication	26	26/984	0.0358104
Genetic Information Processing	Folding, sorting and degradation	map04141	Protein processing in endoplasmic reticulum	26	26/984	1.52441e-05
Metabolism	Energy metabolism	map00195	Photosynthesis	26	26/984	0.00411457
Cellular Processes	Transport and catabolism	map04144	Endocytosis	25	25/984	1.05854e-05
Organismal Systems	Environmental adaptation	map04714	Thermogenesis	22	22/984	2.33887e-05
Metabolism	Carbohydrate metabolism	map00010	Glycolysis / Gluconeogenesis	22	22/984	0.0085737
Metabolism	Energy metabolism	map00190	Oxidative phosphorylation	22	22/984	0.0424923
Genetic Information Processing	Transcription	map03020	RNA polymerase	21	21/984	0.0355642
Metabolism	Amino acid metabolism	map00270	Cysteine and methionine metabolism	20	20/984	0.01363
Human Diseases	Infectious diseases: Viral	map05165	Human papillomavirus infection	20	20/984	0.0412574
Genetic Information Processing	Folding, sorting and degradation	map03018	RNA degradation	20	20/984	0.00662866
Metabolism	Carbohydrate metabolism	map00500	Starch and sucrose metabolism	19	19/984	0.039588
Genetic Information Processing	Replication and repair	map03430	Mismatch repair	18	18/984	0.0118934
Environmental Information Processing	Membrane transport	map02010	ABC transporters	18	18/984	0.0510091
Cellular Processes	Cell growth and death	map04218	Cellular senescence	17	17/984	0.0196871
Metabolism	Energy metabolism	map00710	Carbon fixation in photosynthetic organisms	14	14/984	0.048488
Metabolism	Carbohydrate metabolism	map00520	Amino sugar and nucleotide sugar metabolism	13	13/984	0.0213147
Metabolism	Metabolism of other amino acids	map00480	Glutathione metabolism	13	13/984	0.0173884
Metabolism	Metabolism of cofactors and vitamins	map00860	Porphyrin and chlorophyll metabolism	13	13/984	0.0490214
Cellular Processes	Transport and catabolism	map04146	Peroxisome	13	13/984	0.0369362
Genetic Information Processing	Replication and repair	map03420	Nucleotide excision repair	12	12/984	0.0385361
Genetic Information Processing	Translation	map03013	RNA transport	12	12/984	0.0342061
Genetic Information Processing	Folding, sorting and degradation	map04120	Ubiquitin mediated proteolysis	12	12/984	0.0261602
Genetic Information Processing	Replication and repair	map03410	Base excision repair	12	12/984	0.0112254
Metabolism	Energy metabolism	map00910	Nitrogen metabolism	12	12/984	0.0466666
Metabolism	Lipid metabolism	map00561	Glycerolipid metabolism	12	12/984	0.0398443
Metabolism	Amino acid metabolism	map00310	Lysine degradation	12	12/984	0.049791
Environmental Information Processing	Signal transduction	map04016	MAPK signaling pathway - plant	12	12/984	0.0341583
Genetic Information Processing	Transcription	map03040	Spliceosome	11	11/984	0.0458862
Metabolism	Lipid metabolism	map00564	Glycerophospholipid metabolism	10	10/984	0.0416419
Cellular Processes	Cell growth and death	map04217	Necroptosis	9	9/984	0.0191156
Genetic Information Processing	Translation	map03008	Ribosome biogenesis in eukaryotes	8	8/984	0.0455765
Metabolism	Carbohydrate metabolism	map00620	Pyruvate metabolism	8	8/984	0.0240119
Metabolism	Carbohydrate metabolism	map00051	Fructose and mannose metabolism	8	8/984	0.0411998
Organismal Systems	Digestive system	map04979	Cholesterol metabolism	7	7/984	0.0435377
Genetic Information Processing	Translation	map03015	mRNA surveillance pathway	7	7/984	0.0498368
Metabolism	Lipid metabolism	map01040	Biosynthesis of unsaturated fatty acids	7	7/984	0.0390448
Metabolism	Metabolism of cofactors and vitamins	map00130	Ubiquinone and other terpenoid-quinone biosynthesis	7	7/984	0.0227869
Metabolism	Glycan biosynthesis and metabolism	map00515	Mannose type O-glycan biosynthesis	7	7/984	0.0201007
Metabolism	Carbohydrate metabolism	map00562	Inositol phosphate metabolism	7	7/984	0.0108517
Metabolism	Metabolism of cofactors and vitamins	map00770	Pantothenate and CoA biosynthesis	7	7/984	0.0349017
Metabolism	Amino acid metabolism	map00260	Glycine, serine and threonine metabolism	7	7/984	9.54173e-05
Organismal Systems	Environmental adaptation	map04626	Plant-pathogen interaction	6	6/984	0.0464046
Environmental Information Processing	Signal transduction	map04070	Phosphatidylinositol signaling system	6	6/984	0.0120871
Metabolism	Carbohydrate metabolism	map00630	Glyoxylate and dicarboxylate metabolism	6	6/984	0.0327146
Metabolism	Amino acid metabolism	map00330	Arginine and proline metabolism	6	6/984	0.03929
Metabolism	Metabolism of terpenoids and polyketides	map00906	Carotenoid biosynthesis	6	6/984	0.0322236
Metabolism	Metabolism of other amino acids	map00450	Selenocompound metabolism	6	6/984	0.0474512
Genetic Information Processing	Folding, sorting and degradation	map03060	Protein export	6	6/984	0.0381061
Metabolism	Carbohydrate metabolism	map00020	Citrate cycle (TCA cycle)	6	6/984	0.0249438
Metabolism	Amino acid metabolism	map00280	Valine, leucine and isoleucine degradation	6	6/984	0.0420272
Metabolism	Lipid metabolism	map00071	Fatty acid degradation	6	6/984	0.0438519
Metabolism	Lipid metabolism	map00061	Fatty acid biosynthesis	6	6/984	0.0259729
Human Diseases	Infectious diseases: Viral	map05163	Human cytomegalovirus infection	5	5/984	0.0386902
Human Diseases	Infectious diseases: Viral	map05167	Kaposi sarcoma-associated herpesvirus infection	5	5/984	0.0488437
Human Diseases	Cancers: Specific types	map05226	Gastric cancer	5	5/984	0.0442229
Metabolism	Energy metabolism	map00920	Sulfur metabolism	5	5/984	0.0138319
Metabolism	Lipid metabolism	map00100	Steroid biosynthesis	5	5/984	0.031684
Metabolism	Glycan biosynthesis and metabolism	map00510	N-Glycan biosynthesis	5	5/984	0.0460784
Metabolism	Carbohydrate metabolism	map00052	Galactose metabolism	5	5/984	0.0206908
Metabolism	Amino acid metabolism	map00250	Alanine, aspartate and glutamate metabolism	5	5/984	0.0174576
Organismal Systems	Endocrine system	map04926	Relaxin signaling pathway	4	4/984	0.0170221
Human Diseases	Endocrine and metabolic diseases	map04934	Cushing syndrome	4	4/984	0.0467868
Organismal Systems	Immune system	map04625	C-type lectin receptor signaling pathway	4	4/984	0.00265258
Environmental Information Processing	Signal transduction	map04075	Plant hormone signal transduction	4	4/984	0.0468045
Metabolism	Carbohydrate metabolism	map00640	Propanoate metabolism	4	4/984	0.043743
Metabolism	Metabolism of cofactors and vitamins	map00730	Thiamine metabolism	4	4/984	0.0397148
Metabolism	Carbohydrate metabolism	map00030	Pentose phosphate pathway	4	4/984	0.0375869
Metabolism	Metabolism of terpenoids and polyketides	map00900	Terpenoid backbone biosynthesis	4	4/984	0.0450972
Metabolism	Lipid metabolism	map00592	alpha-Linolenic acid metabolism	4	4/984	0.0360076
Metabolism	Amino acid metabolism	map00350	Tyrosine metabolism	4	4/984	0.0496649
Metabolism	Lipid metabolism	map00600	Sphingolipid metabolism	4	4/984	0.0393013
Metabolism	Metabolism of cofactors and vitamins	map00790	Folate biosynthesis	4	4/984	0.0329106
Metabolism	Carbohydrate metabolism	map00040	Pentose and glucuronate interconversions	4	4/984	0.0265901
Metabolism	Amino acid metabolism	map00380	Tryptophan metabolism	4	4/984	0.0245325
Metabolism	Energy metabolism	map00196	Photosynthesis - antenna proteins	4	4/984	0.0245325
Metabolism	Glycan biosynthesis and metabolism	map00563	Glycosylphosphatidylinositol (GPI)-anchor biosynthesis	4	4/984	0.0392364
Metabolism	Metabolism of cofactors and vitamins	map00740	Riboflavin metabolism	4	4/984	0.0429239
Human Diseases	Endocrine and metabolic diseases	map04933	AGE-RAGE signaling pathway in diabetic complications	3	3/984	0.0419922
Human Diseases	Cancers: Specific types	map05225	Hepatocellular carcinoma	3	3/984	0.0476007
Genetic Information Processing	Folding, sorting and degradation	map04122	Sulfur relay system	3	3/984	0.0336929
Metabolism	Amino acid metabolism	map00400	Phenylalanine, tyrosine and tryptophan biosynthesis	3	3/984	0.0314272
Genetic Information Processing	Translation	map00970	Aminoacyl-tRNA biosynthesis	3	3/984	0.0456974
Metabolism	Amino acid metabolism	map00220	Arginine biosynthesis	3	3/984	0.0264034
Metabolism	Lipid metabolism	map00590	Arachidonic acid metabolism	3	3/984	0.0264034
Metabolism	Carbohydrate metabolism	map00053	Ascorbate and aldarate metabolism	3	3/984	0.0339855
Metabolism	Amino acid metabolism	map00300	Lysine biosynthesis	3	3/984	0.0456937
Metabolism	Amino acid metabolism	map00290	Valine, leucine and isoleucine biosynthesis	3	3/984	0.0195727
Metabolism	Amino acid metabolism	map00360	Phenylalanine metabolism	3	3/984	0.0280311
Metabolism	Metabolism of other amino acids	map00410	beta-Alanine metabolism	3	3/984	0.0285572
Metabolism	Glycan biosynthesis and metabolism	map00511	Other glycan degradation	3	3/984	0.045233
Metabolism	Lipid metabolism	map00062	Fatty acid elongation	3	3/984	0.0258995
Cellular Processes	Transport and catabolism	map04145	Phagosome	2	2/984	0.0354975
Genetic Information Processing	Transcription	map03022	Basal transcription factors	2	2/984	0.0434325
Genetic Information Processing	Folding, sorting and degradation	map04130	SNARE interactions in vesicular transport	2	2/984	0.0352846
Metabolism	Biosynthesis of other secondary metabolites	map00950	Isoquinoline alkaloid biosynthesis	2	2/984	0.0479602
Metabolism	Metabolism of other amino acids	map00430	Taurine and hypotaurine metabolism	2	2/984	0.0452557
Metabolism	Glycan biosynthesis and metabolism	map00514	Other types of O-glycan biosynthesis	2	2/984	0.0243047
Metabolism	Metabolism of cofactors and vitamins	map00760	Nicotinate and nicotinamide metabolism	2	2/984	0.0494872
Metabolism	Biosynthesis of other secondary metabolites	map00960	Tropane, piperidine and pyridine alkaloid biosynthesis	2	2/984	0.0297733
Genetic Information Processing	Folding, sorting and degradation	map03050	Proteasome	2	2/984	0.0227827
Metabolism	Lipid metabolism	map00072	Synthesis and degradation of ketone bodies	2	2/984	0.0392875
Metabolism	Carbohydrate metabolism	map00650	Butanoate metabolism	2	2/984	0.0455729
Metabolism	Biosynthesis of other secondary metabolites	map00999	Biosynthesis of secondary metabolites - unclassified	2	2/984	0.0156813
Organismal Systems	Endocrine system	map04928	Parathyroid hormone synthesis, secretion and action	2	2/984	0.0365923
Organismal Systems	Endocrine system	map04927	Cortisol synthesis and secretion	2	2/984	0.0137893
Metabolism	Metabolism of cofactors and vitamins	map00750	Vitamin B6 metabolism	2	2/984	0.0215511
Metabolism	Chemical structure transformation maps	map01062	Biosynthesis of terpenoids and steroids	1	1/984	0.0485101
Metabolism	Biosynthesis of other secondary metabolites	map00333	Prodigiosin biosynthesis	1	1/984	0.0134431
Metabolism	Glycan biosynthesis and metabolism	map00531	Glycosaminoglycan degradation	1	1/984	0.0485848
Genetic Information Processing	Replication and repair	map03450	Non-homologous end-joining	1	1/984	0.0378192
Metabolism	Biosynthesis of other secondary metabolites	map00965	Betalain biosynthesis	1	1/984	0.0316193
Metabolism	Carbohydrate metabolism	map00660	C5-Branched dibasic acid metabolism	1	1/984	0.0316193
Metabolism	Glycan biosynthesis and metabolism	map00604	Glycosphingolipid biosynthesis - ganglio series	1	1/984	0.0413195
Metabolism	Biosynthesis of other secondary metabolites	map00940	Phenylpropanoid biosynthesis	1	1/984	0.0312174
